# Supplementary material for: tert-Butyl nitrite mediated azo coupling between anilines and imidazoheterocycles
Source: Royal Society of Chemistry journal article supplement (doi:10.1039/c6ra03070j), 2016-01-01
Supplement: c6ra03070j1.pdf [file c6ra03070j1.pdf]

## Supporting Information

### ***tert*-Butyl nitrite mediated azo coupling between anilines and imidazoheterocycles**

Amrita Chakraborty, Sourav Jana, Golam Kibriya, Amrita Dey and Alakananda  
Hajra\*

*Department of Chemistry, Visva-Bharati (A Central University), Santiniketan 731235, India*

Tel. /fax: +913463 261526; E-mail: [alakananda.hajra@visva-bharati.ac.in](mailto:alakananda.hajra@visva-bharati.ac.in)

### **Contents**

|                                                                              |        |
|------------------------------------------------------------------------------|--------|
| <i>Crystallography data table of 3aa</i> .....                               | S2     |
| <i><sup>1</sup>H &amp; <sup>13</sup>C NMR spectra of all compounds</i> ..... | S3-S57 |

**C. Crystallographic data table of compound 3aa:**

| <b>Crystal data</b>                                                               | <b>Compound 3aa</b>                            |
|-----------------------------------------------------------------------------------|------------------------------------------------|
| CCDC Number                                                                       | 1420103                                        |
| Empirical formula                                                                 | C <sub>21</sub> H <sub>18</sub> N <sub>4</sub> |
| Formula weight                                                                    | 326.39                                         |
| Crystal size/mm                                                                   | 0.60×0.30<br>×0.20                             |
| Crystal system                                                                    | Monoclinic                                     |
| Space group                                                                       | <i>P</i> 2 <sub>1</sub> / <i>n</i>             |
| <i>a</i> /Å                                                                       | 9.532(3)                                       |
| <i>b</i> /Å                                                                       | 9.630(3)                                       |
| <i>c</i> /Å                                                                       | 17.838(5)                                      |
| $\alpha$ /°                                                                       | 90.00                                          |
| $\beta$ /°                                                                        | 98.075(7)                                      |
| $\gamma$ /°                                                                       | 90.00                                          |
| Volume/Å <sup>3</sup>                                                             | 1621.0(8)                                      |
| Density                                                                           | 1.337                                          |
| <i>Z</i>                                                                          | 4                                              |
| F(000)                                                                            | 688                                            |
| $\mu$ MoK $\alpha$ /mm <sup>-1</sup>                                              | 0.202                                          |
| Mo K $\alpha$ radiation                                                           | $\lambda$ =0.71073 Å                           |
| Temperature/K                                                                     | 150(2)                                         |
| R <sub>int</sub>                                                                  | 0.1667                                         |
| Range of <i>h,k,l</i>                                                             | -10/10,-10/10,<br>-19/19                       |
| $\theta_{\min/\max}$ /°                                                           | 2.30/ 23.17                                    |
| Reflections<br>collected/unique/<br>observed [ <i>I</i> >2 $\sigma$ ( <i>I</i> )] | 12805/2293<br>/1363                            |
| Data/restraints/<br>parameters                                                    | 2293/0/228                                     |
| Goodness of fit on F <sup>2</sup>                                                 | 0.777                                          |
| Final<br>R <sub>indices</sub> [ <i>I</i> >2 $\sigma$ ( <i>I</i> )]                | R1= 0.0543<br>wR2= 0.1278                      |
| R <sub>indices</sub> (all data)                                                   | R1=0.0992<br>wR2= 0.1558                       |

**$^1\text{H}$  and  $^{13}\text{C}$  NMR Spectra(s) for the synthesized compounds:**

1H of VBAN-126

9.823  
9.806  
8.472  
8.468  
8.450  
8.448  
7.769  
7.749  
7.555  
7.536  
7.517  
7.479  
7.476  
7.463  
7.457  
7.452  
7.439  
7.295  
7.275  
7.260  
7.242  
7.224  
6.927  
6.910  
6.893

2.719  
2.427

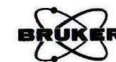

Current Data Parameters  
NAME Dr. A HAJRA 2015  
EXPNO 18  
PROCNO 1

F2 - Acquisition Parameters  
Date\_ 20150202  
Time\_ 18.12  
INSTRUM spect  
PROBHD 5 mm PABBO BB/  
PULPROG zg30  
TD 32768  
SOLVENT CDC13  
NS 32  
DS 2  
SWH 8223.685 Hz  
FIDRES 0.250967 Hz  
AQ 1.9923444 sec  
RG 40.87  
DW 60.800 usec  
DE 6.50 usec  
TE 296.3 K  
D1 1.00000000 sec  
TD0 1

===== CHANNEL f1 =====  
NUC1 1H  
P1 14.75 usec  
PLW1 11.99499989 W  
SF01 400.1524711 MHz

F2 - Processing parameters  
SI 16384  
SF 400.1500090 MHz  
WDW EM  
SSB 0  
LB 0.30 Hz  
GB 0  
PC 1.00

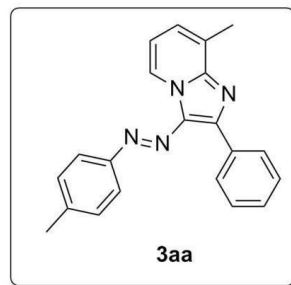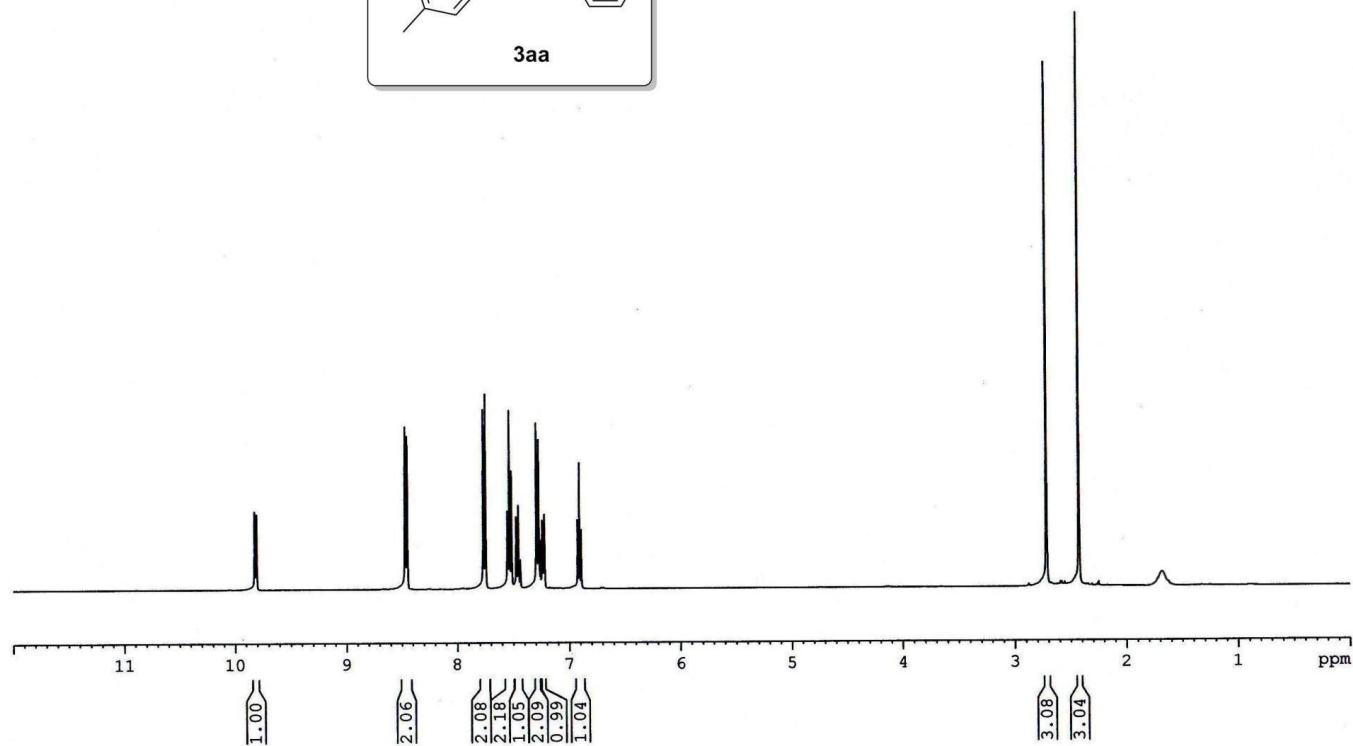



13C of VBAN-126

151.95  
149.68  
145.97  
139.67  
133.52  
132.53  
130.12  
129.89  
129.07  
128.47  
128.40  
127.35  
127.15  
122.01  
115.09

77.48  
77.16  
76.84

21.53  
16.95

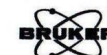

Current Data Parameters  
NAME Dr. A HAJRA 2015  
EXPNO 19  
PROCNO 1

F2 - Acquisition Parameters  
Date\_ 20150202  
Time 18.42  
INSTRUM spect  
PROBHD 5 mm PABBO BB/  
PULPROG zgpg30  
TD 32768  
SOLVENT CDCl3  
NS 512  
DS 2  
SWH 24038.461 Hz  
FIDRES 0.733596 Hz  
AQ 0.6816244 sec  
RG 40.87  
DW 20.800 usec  
DE 6.50 usec  
TE 297.5 K  
D1 2.0000000 sec  
D11 0.0300000 sec  
TD0 1

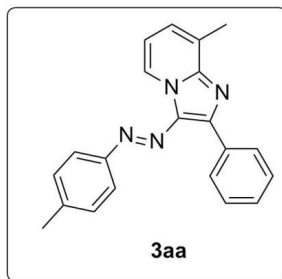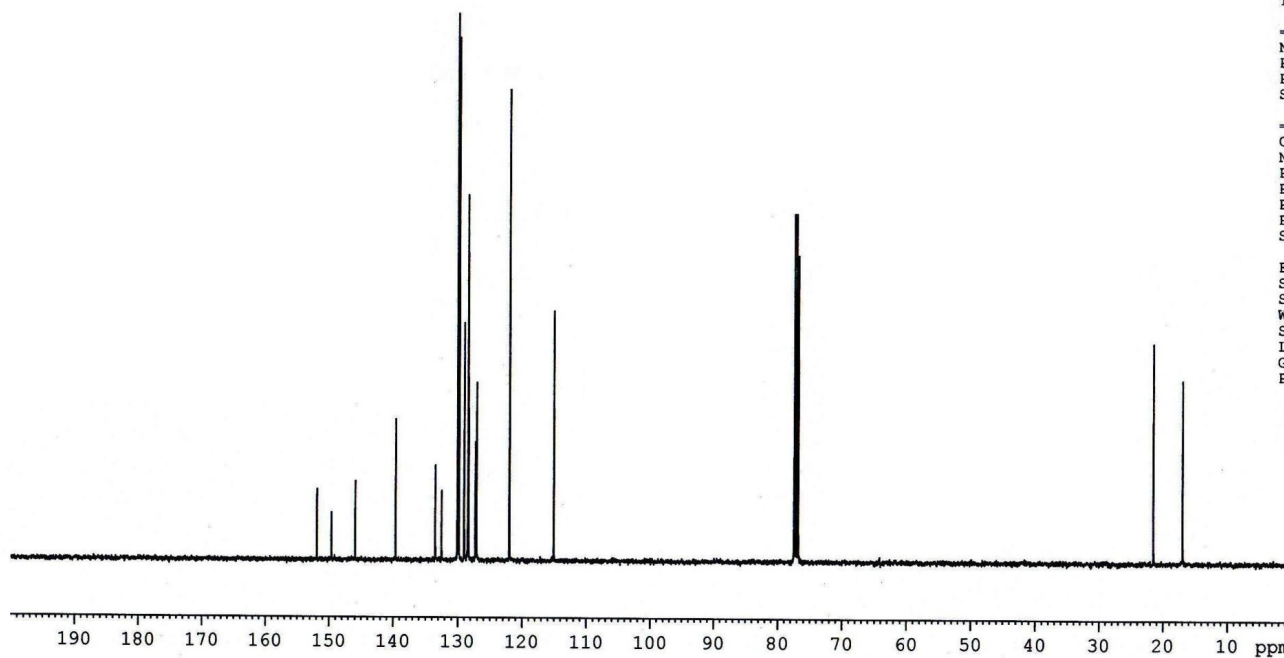

===== CHANNEL f1 =====  
NUC1 13C  
P1 8.90 usec  
PLW1 54.0000000 W  
SFO1 100.6278588 MHz

===== CHANNEL f2 =====  
CPDPRG2 waltz16  
NUC2 1H  
PCPD2 80.00 usec  
PLW2 12.0000000 W  
PLW12 0.40792999 W  
PLW13 0.26107001 W  
SFO2 400.1516006 MHz

F2 - Processing parameters  
SI 16384  
SF 100.6177895 MHz  
WDW EM  
SSB 0  
LB 1.00 Hz  
GB 0  
PC 1.40

1H of VBAN-125

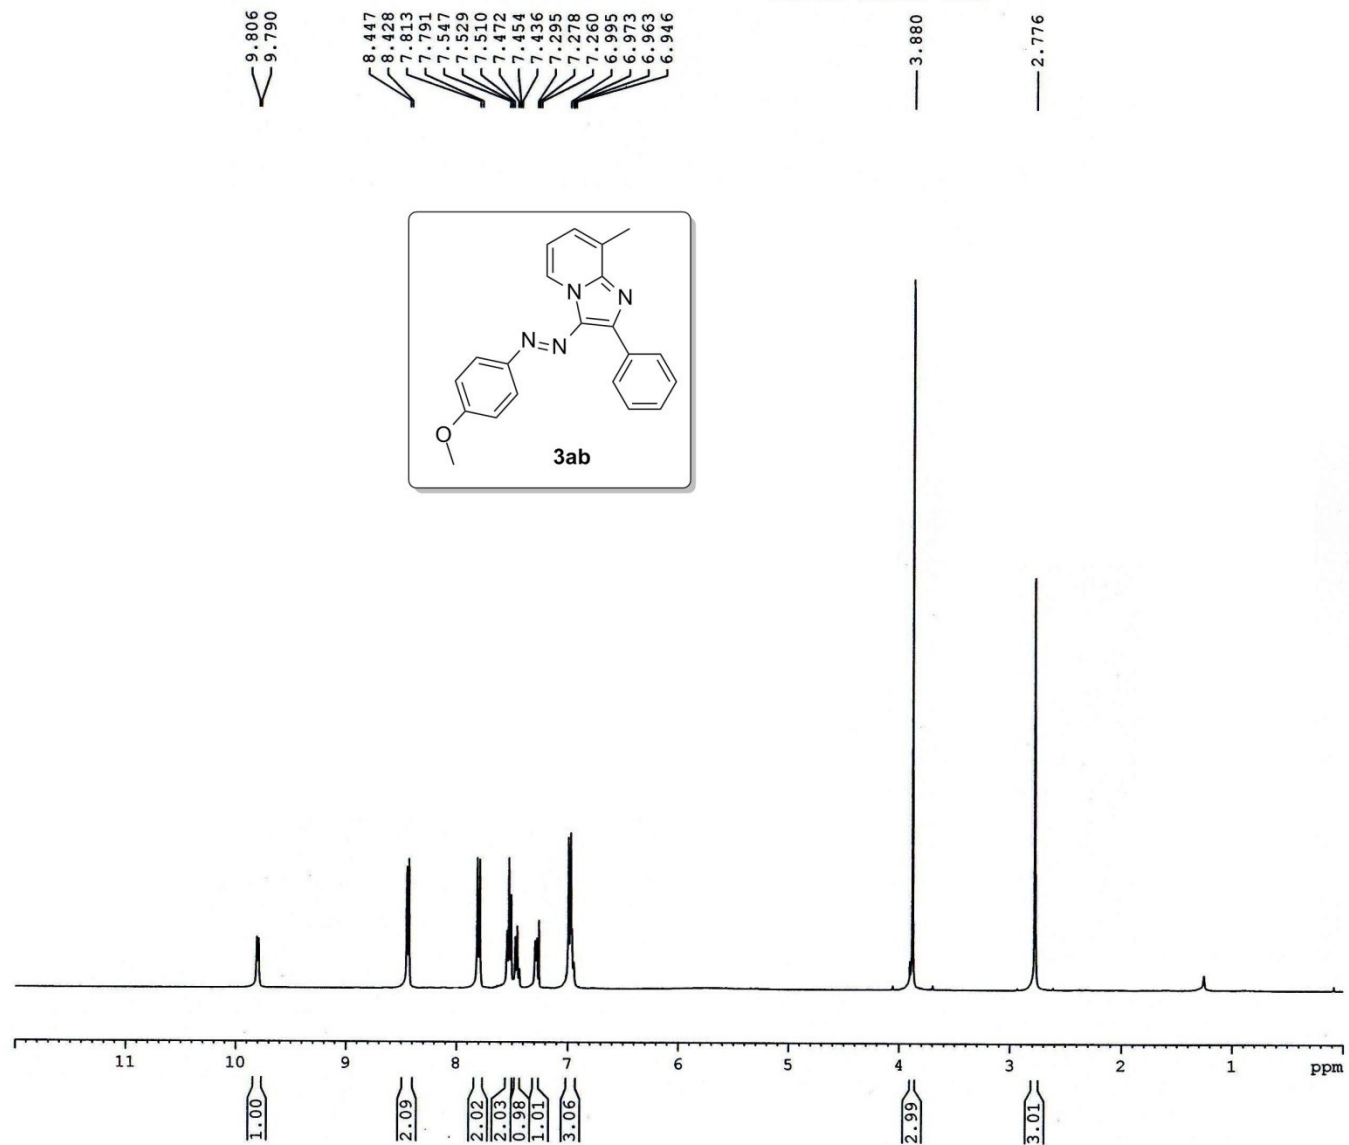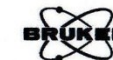

Current Data Parameters  
 NAME Dr. A HAJRA 2015  
 EXPNO 15  
 PROCNO 1

F2 - Acquisition Parameters  
 Date\_ 20150131  
 Time 18.23  
 INSTRUM spect  
 PROBHD 5 mm PABBO BB/  
 PULPROG zg30  
 TD 32768  
 SOLVENT CDC13  
 NS 32  
 DS 2  
 SWH 8223.685 Hz  
 FIDRES 0.250967 Hz  
 AQ 1.9923444 sec  
 RG 77.59  
 DW 60.800 usec  
 DE 6.50 usec  
 TE 296.4 K  
 D1 1.00000000 sec  
 TD0 1

===== CHANNEL f1 =====  
 NUC1 1H  
 P1 14.75 usec  
 PLW1 11.99499989 W  
 SFO1 400.1524711 MHz

F2 - Processing parameters  
 SI 16384  
 SF 400.1500090 MHz  
 WDW EM  
 SSB 0  
 LB 0.30 Hz  
 GB 0  
 PC 1.00

13C of VBAN-125

161.19  
 148.01  
 144.69  
 132.31  
 132.08  
 130.31  
 129.38  
 129.15  
 128.53  
 127.10  
 127.06  
 123.82  
 115.57  
 114.50  
 77.48  
 77.16  
 76.84  
 55.72  
 17.30

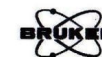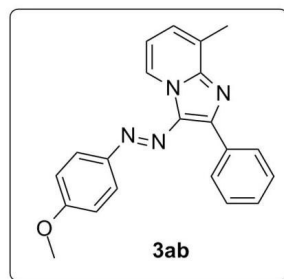

Current Data Parameters  
 NAME Dr. A HAJRA 2015  
 EXPNO 16  
 PROCNO 1

F2 - Acquisition Parameters  
 Date\_ 20150131  
 Time\_ 18.54  
 INSTRUM spect  
 PROBHD 5 mm PABBO BB/  
 PULPROG zgpg30  
 TD 32768  
 SOLVENT CDCl3  
 NS 512  
 DS 2  
 SWH 24038.461 Hz  
 FIDRES 0.733596 Hz  
 AQ 0.6816244 sec  
 RG 77.59  
 DW 20.800 usec  
 DE 6.50 usec  
 TE 297.5 K  
 D1 2.0000000 sec  
 D11 0.0300000 sec  
 TDO 1

===== CHANNEL f1 =====  
 NUC1 13C  
 P1 8.90 usec  
 PLW1 54.0000000 W  
 SFO1 100.6278588 MHz

===== CHANNEL f2 =====  
 CPDPRG2 waltz16  
 NUC2 1H  
 PCPD2 80.00 usec  
 PLW2 12.0000000 W  
 PLW12 0.40792999 W  
 PLW13 0.26107001 W  
 SFO2 400.1516006 MHz

F2 - Processing parameters  
 SI 16384  
 SF 100.6177880 MHz  
 WDW EM  
 SSB 0  
 LB 1.00 Hz  
 GB 0  
 PC 1.40

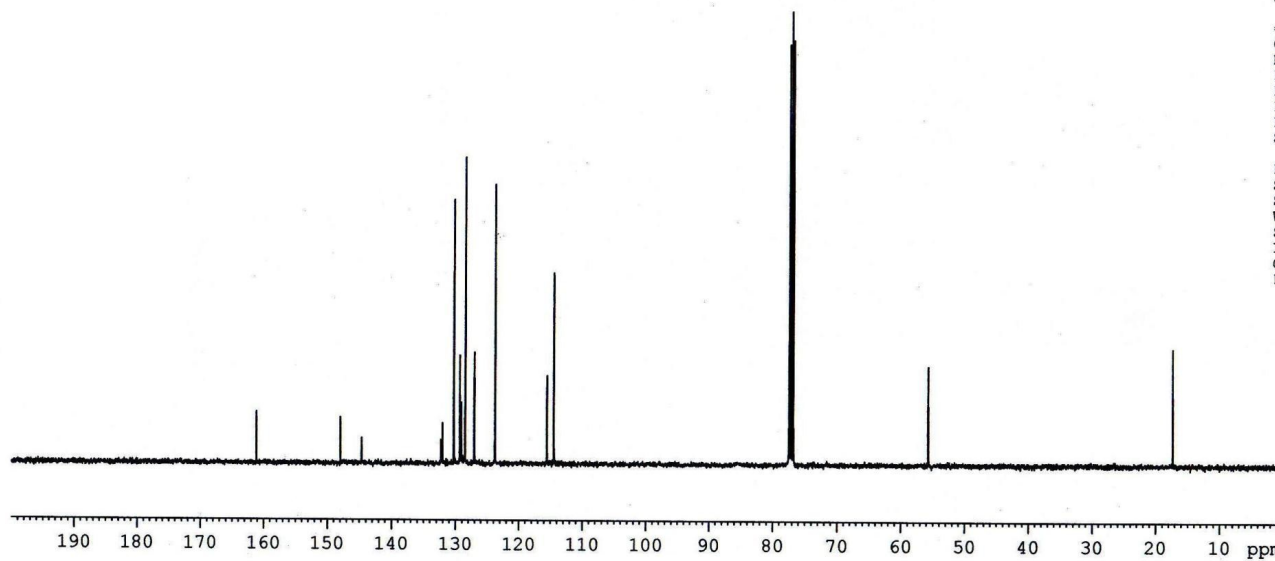

1H of VBAN-127

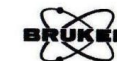

Current Data Parameters  
 NAME Dr. A HAJRA 2015  
 EXPNO 24  
 PROCNO 1

F2 - Acquisition Parameters  
 Date\_ 20150203  
 Time 12.11  
 INSTRUM spect  
 PROBHD 5 mm PABBO BB/  
 PULPROG zg30  
 TD 32768  
 SOLVENT CDCl3  
 NS 24  
 DS 2  
 SWH 8223.685 Hz  
 FIDRES 0.250967 Hz  
 AQ 1.9923444 sec  
 RG 62.69  
 DW 60.800 usec  
 DE 6.50 usec  
 TE 293.3 K  
 D1 1.00000000 sec  
 TD0 1

===== CHANNEL f1 =====  
 NUC1 1H  
 P1 14.75 usec  
 PLW1 11.99499989 W  
 SFO1 400.1524711 MHz

F2 - Processing parameters  
 SI 16384  
 SF 400.1500090 MHz  
 WDW EM  
 SSB 0  
 LB 0.30 Hz  
 GB 0  
 PC 1.00

9.868  
 9.851  
 8.448  
 8.430  
 7.875  
 7.856  
 7.554  
 7.536  
 7.521  
 7.517  
 7.503  
 7.483  
 7.464  
 7.404  
 7.386  
 7.367  
 7.296  
 7.279  
 7.260  
 6.986  
 6.969  
 6.951

— 2.737

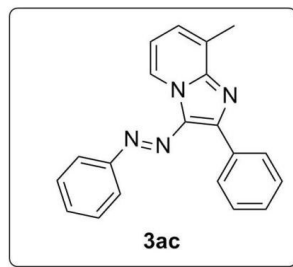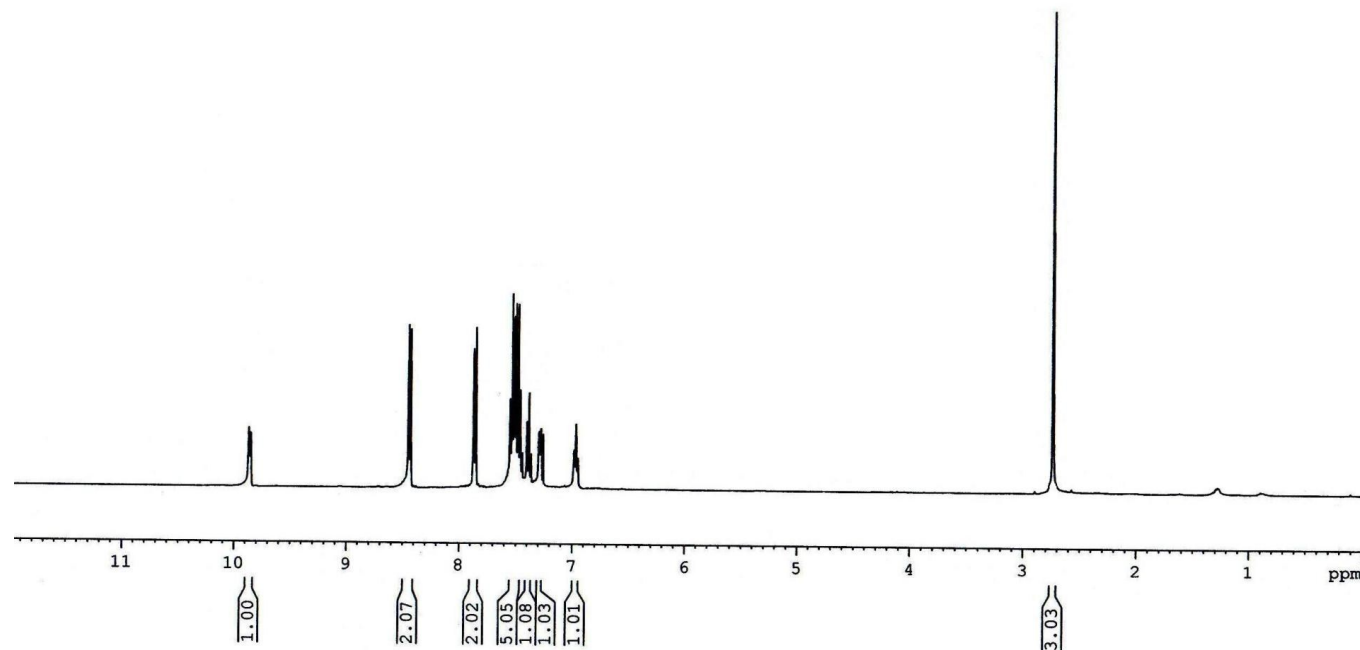

13C of VBAN-127

153.83  
150.18  
145.99  
133.11  
130.22  
129.58  
129.41  
129.32  
129.26  
129.00  
128.53  
127.99  
127.23  
122.13  
115.46

77.48  
77.16  
76.84

17.04

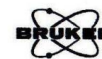

Current Data Parameters  
NAME Dr. A HAJRA 2015  
EXPNO 25  
PROCNO 1

F2 - Acquisition Parameters  
Date\_ 20150203  
Time\_ 12.40  
INSTRUM spect  
PROBHD 5 mm PABBO BB/  
PULPROG zgpg30  
TD 32768  
SOLVENT CDC13  
NS 512  
DS 2  
SWH 24038.461 Hz  
FIDRES 0.733596 Hz  
AQ 0.6816244 sec  
RG 62.69  
DW 20.800 usec  
DE 6.50 usec  
TE 294.5 K  
D1 2.00000000 sec  
D11 0.03000000 sec  
TD0 1

===== CHANNEL f1 =====  
NUC1 13C  
P1 8.90 usec  
PLW1 54.00000000 W  
SFO1 100.6278588 MHz

===== CHANNEL f2 =====  
CPDPRG2 waltz16  
NUC2 1H  
PCPD2 80.00 usec  
PLW2 12.00000000 W  
PLW12 0.40792999 W  
PLW13 0.26107001 W  
SFO2 400.1516006 MHz

F2 - Processing parameters  
SI 16384  
SF 100.6177895 MHz  
WDW EM  
SSB 0  
LB 1.00 Hz  
GB 0  
PC 1.40

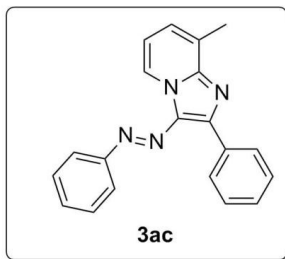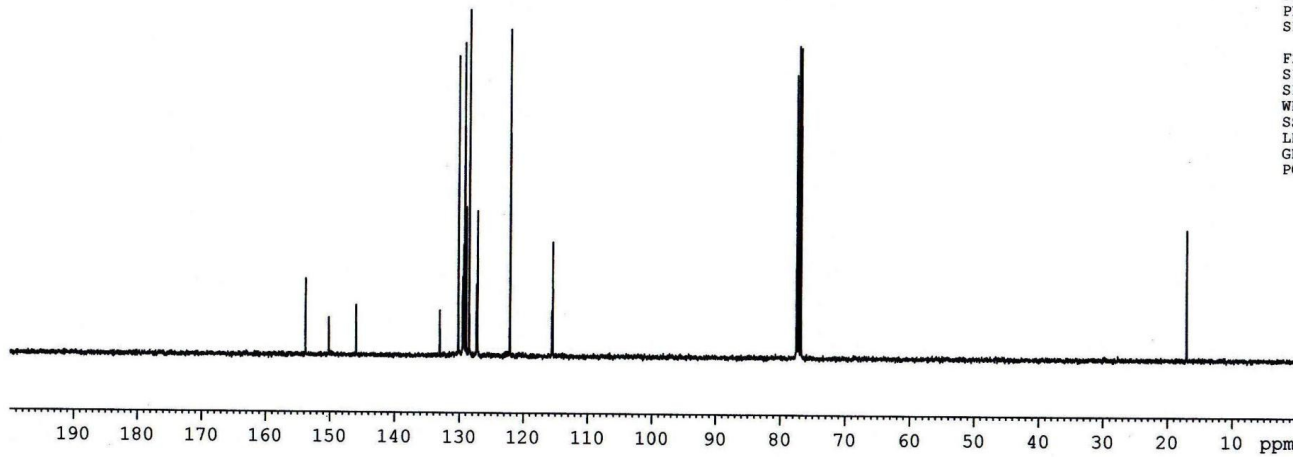

1H of VBAC-111

9.974  
9.957  
8.452  
8.448  
8.444  
8.430  
7.782  
7.761  
7.736  
7.550  
7.546  
7.532  
7.529  
7.513  
7.476  
7.474  
7.458  
7.440  
7.437  
7.305  
7.285  
7.260  
7.043  
7.026  
7.008

2.429

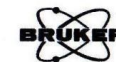

Current Data Parameters  
NAME Dr. A HAJRA 2015  
EXPNO 307  
PROCNO 1

F2 - Acquisition Parameters  
Date\_ 20150623  
Time 17.27  
INSTRUM spect  
PROBHD 5 mm PABBO BB/  
PULPROG zg30  
TD 32768  
SOLVENT CDC13  
NS 32  
DS 1  
SWH 8223.685 Hz  
FIDRES 0.250967 Hz  
AQ 1.9923444 sec  
RG 87.66  
DW 60.800 usec  
DE 6.50 usec  
TE 297.6 K  
D1 1.00000000 sec  
TD0 1

===== CHANNEL f1 =====  
NUC1 1H  
P1 14.75 usec  
PLW1 11.99499989 W  
SFO1 400.1524711 MHz

F2 - Processing parameters  
SI 16384  
SF 400.1500090 MHz  
WDW EM  
SSB 0  
LB 0.30 Hz  
GB 0  
PC 1.00

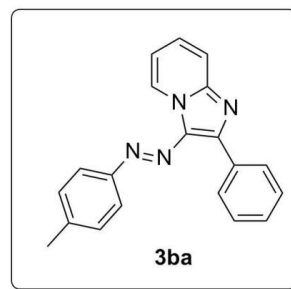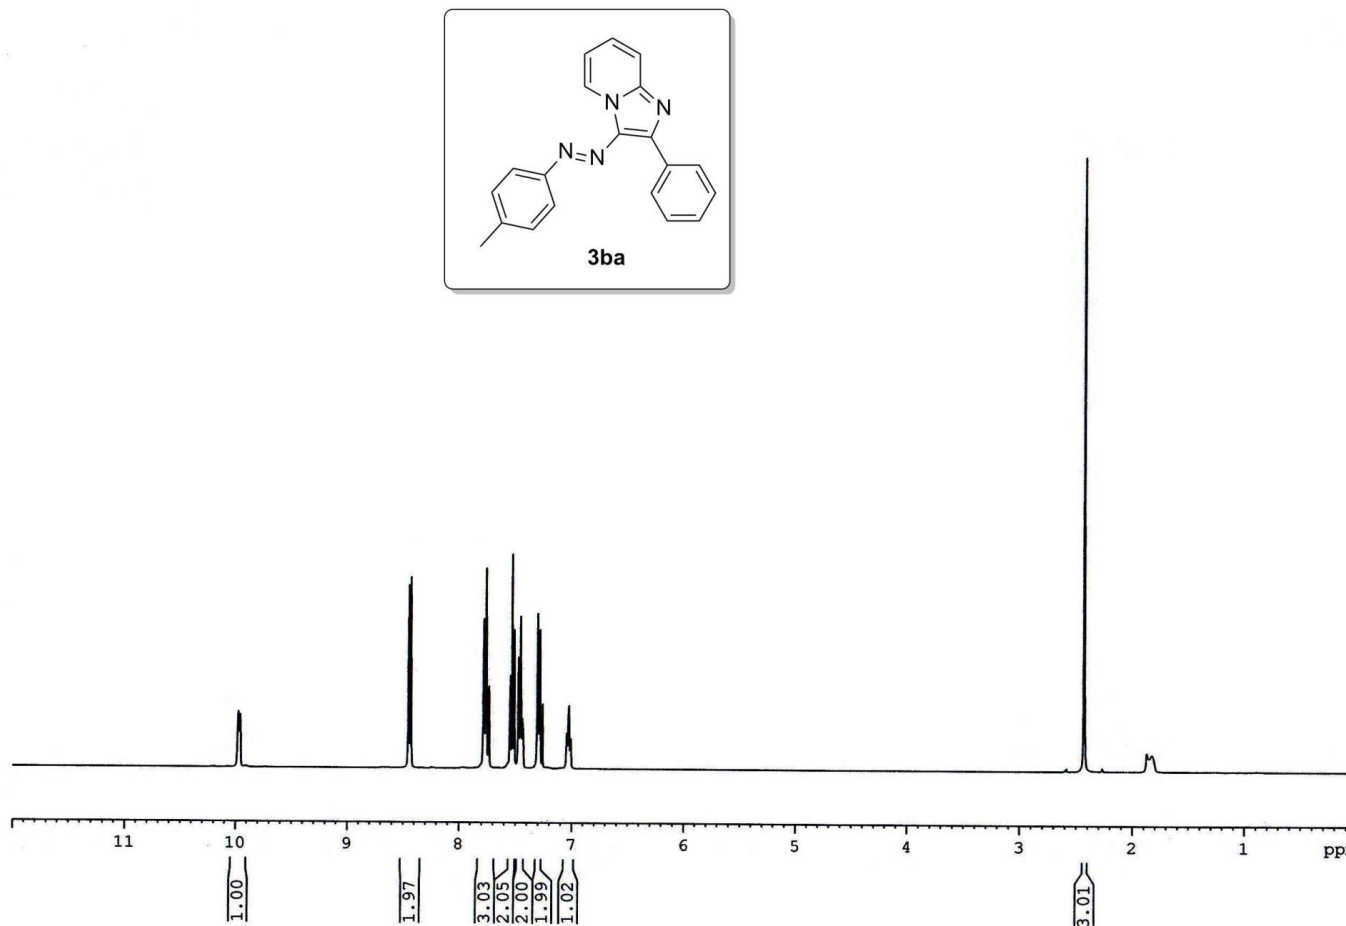

13C of VBAC-111

151.95  
150.30  
145.99  
139.92  
133.36  
132.25  
130.06  
129.96  
129.43  
129.27  
129.25  
128.55  
122.09  
117.55  
115.17

77.48  
77.16  
76.84

— 21.56

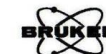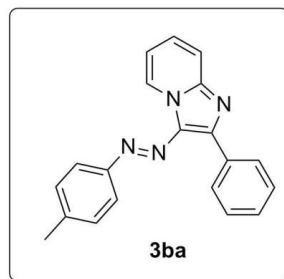

Current Data Parameters  
NAME Dr. A HAJRA 2015  
EXPNO 308  
PROCNO 1

F2 - Acquisition Parameters  
Date\_ 20150623  
Time 17.39  
INSTRUM spect  
PROBHD 5 mm PABBO BB/  
PULPROG zgpg30  
TD 32768  
SOLVENT CDC13  
NS 216  
DS 2  
SWH 24038.461 Hz  
FIDRES 0.733596 Hz  
AQ 0.6816244 sec  
RG 47.25  
DW 20.800 usec  
DE 6.50 usec  
TE 298.5 K  
D1 2.0000000 sec  
D11 0.0300000 sec  
TD0 1

===== CHANNEL f1 =====  
NUC1 13C  
P1 8.90 usec  
PLW1 54.0000000 W  
SFO1 100.6278588 MHz

===== CHANNEL f2 =====  
CPDPRG2 waltz16  
NUC2 1H  
PCPD2 80.00 usec  
PLW2 12.0000000 W  
PLW12 0.40792999 W  
PLW13 0.26107001 W  
SFO2 400.1516006 MHz

F2 - Processing parameters  
SI 16384  
SF 100.6177865 MHz  
WDW EM  
SSB 0  
LB 1.00 Hz  
GB 0  
PC 1.40

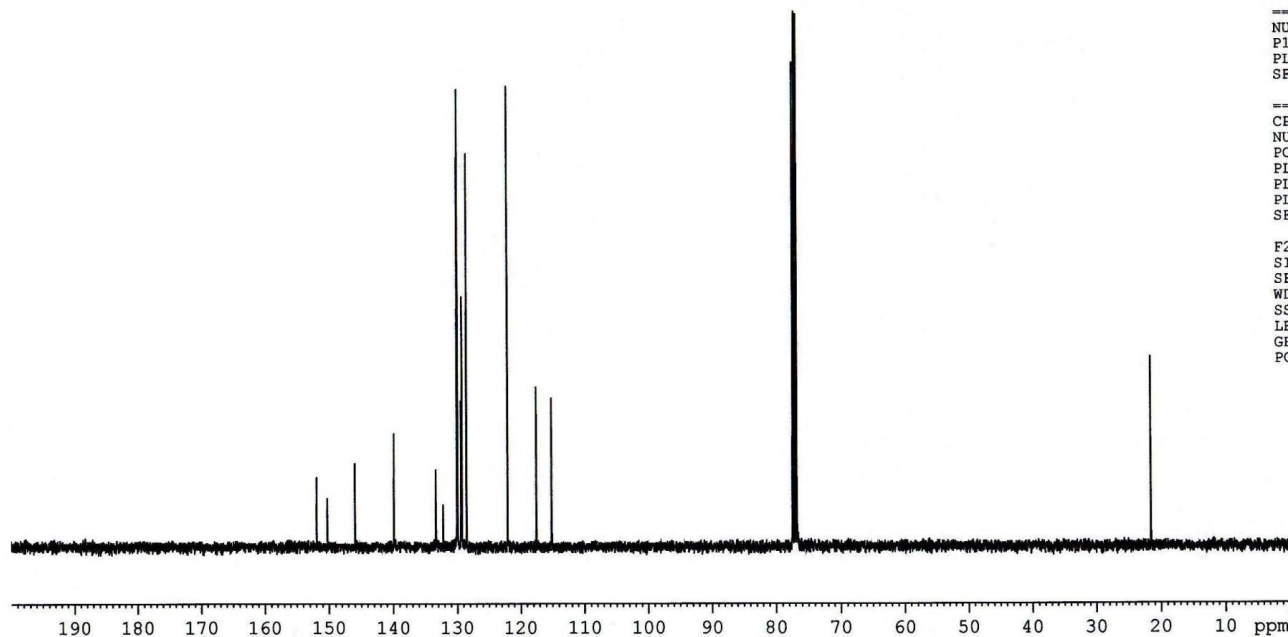



1H CI VDAC-130

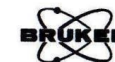

Current Data Parameters  
 NAME Dr. A HAJRA 2015  
 EXPNO 545  
 PROCNO 1

F2 - Acquisition Parameters  
 Date\_ 20150818  
 Time 17.00  
 INSTRUM spect  
 PROBHD 5 mm PABBO BB/  
 PULPROG zg30  
 TD 32768  
 SOLVENT CDC13  
 NS 32  
 DS 1  
 SWH 8223.685 Hz  
 FIDRES 0.250967 Hz  
 AQ 1.9923444 sec  
 RG 87.66  
 DW 60.800 usec  
 DE 6.50 usec  
 TE 295.5 K  
 D1 1.0000000 sec  
 TD0 1

===== CHANNEL f1 =====  
 NUC1 1H  
 P1 14.75 usec  
 PLW1 11.99499989 W  
 SFO1 400.1524711 MHz

F2 - Processing parameters  
 SI 16384  
 SF 400.1500089 MHz  
 WDW EM  
 SSB 0  
 LB 0.30 Hz  
 GB 0  
 PC 1.00

10.015

8.424  
8.411  
8.407  
7.887  
7.876  
7.774  
7.762  
7.649  
7.631  
7.536  
7.516  
7.503  
7.491  
7.486  
7.473  
7.433  
7.420  
7.402  
7.394  
7.377  
7.260  
7.168  
7.152

2.760

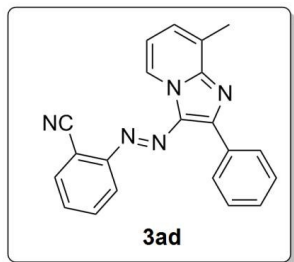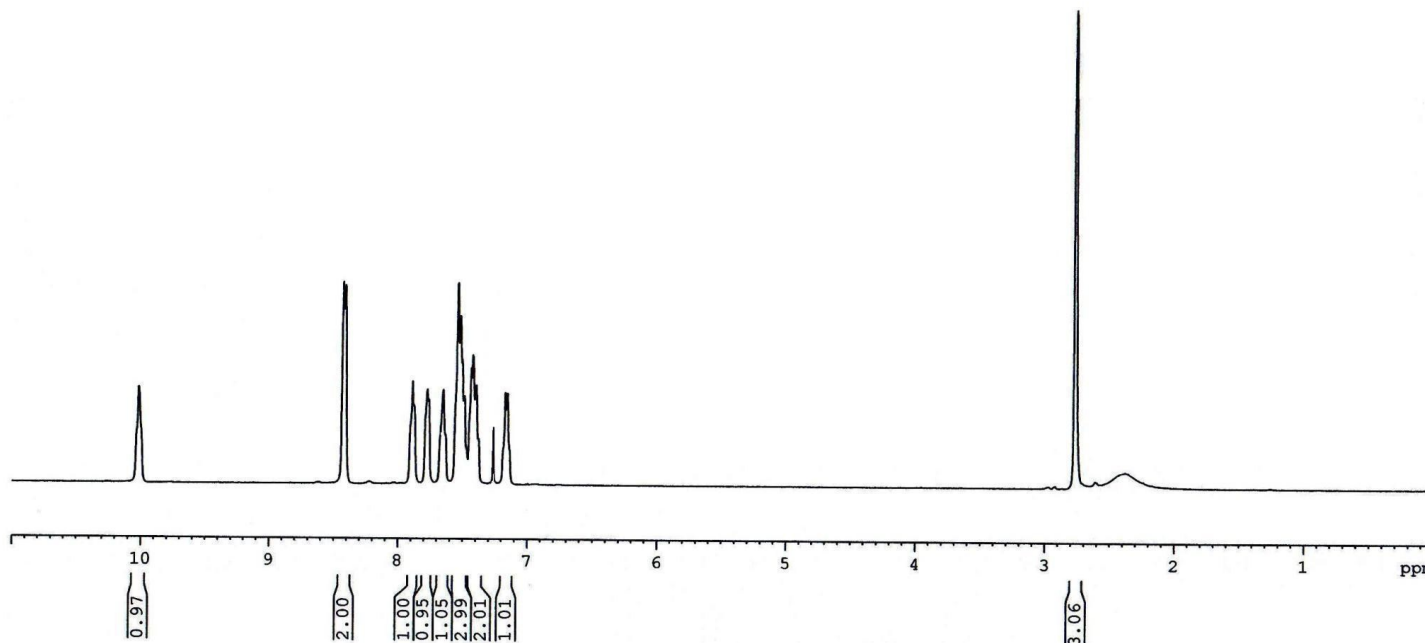



13C of VBAC-130

156.00  
152.87  
147.09  
133.55  
133.15  
132.64  
131.14  
130.39  
129.97  
128.73  
128.66  
128.41  
127.57  
118.25  
117.02  
115.57  
111.99

77.48  
77.16  
76.85

16.98

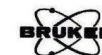

Current Data Parameters  
NAME Dr. A HAJRA 2015  
EXPNO 546  
PROCNO 1

F2 - Acquisition Parameters  
Date\_ 20150818  
Time 16.52  
INSTRUM spect  
PROBHD 5 mm PABBO BB/  
PULPROG zgpg30  
TD 32768  
SOLVENT CDCl3  
NS 320  
DS 2  
SWH 24038.461 Hz  
FIDRES 0.733596 Hz  
AQ 0.6816244 sec  
RG 87.66  
DW 20.800 usec  
DE 6.50 usec  
TE 296.2 K  
D1 2.00000000 sec  
D11 0.03000000 sec  
TD0 1

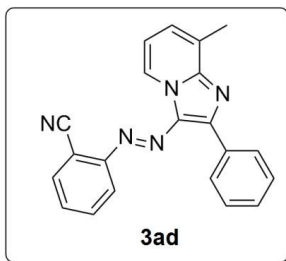

===== CHANNEL f1 =====  
NUC1 13C  
P1 8.90 usec  
PLW1 54.00000000 W  
SFO1 100.6278588 MHz

===== CHANNEL f2 =====  
CPDPRG2 waltz16  
NUC2 1H  
PCPD2 80.00 usec  
PLW2 12.00000000 W  
PLW12 0.40792999 W  
PLW13 0.26107001 W  
SFO2 400.1516006 MHz

F2 - Processing parameters  
SI 16384  
SF 100.6177852 MHz  
WDW EM  
SSB 0  
LB 1.00 Hz  
GB 0  
PC 1.40

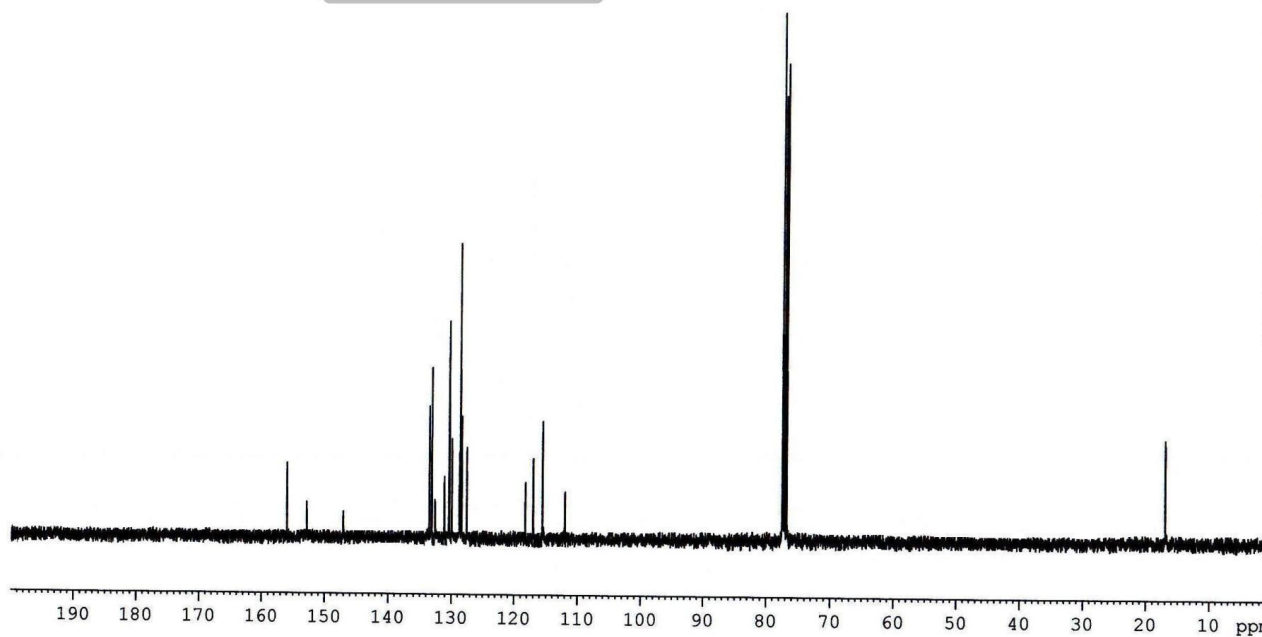

1H of VBAC-104-A

9.806  
9.789  
8.608  
8.604  
8.599  
8.412  
8.409  
8.391  
8.168  
8.166  
8.163  
8.148  
8.146  
8.142  
8.096  
8.094  
8.076  
8.074  
7.622  
7.601  
7.581  
7.557  
7.540  
7.521  
7.499  
7.496  
7.487  
7.482  
7.463  
7.362  
7.344  
7.260  
7.041  
7.023  
7.006

— 2.724

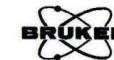

Current Data Parameters  
NAME Dr. A HAJRA 2015  
EXPNO 275  
PROCNO 1

F2 - Acquisition Parameters  
Date\_ 20150616  
Time\_ 18.01  
INSTRUM spect  
PROBHD 5 mm PABBO BB/  
PULPROG zg30  
TD 32768  
SOLVENT CDC13  
NS 24  
DS 2  
SWH 8223.685 Hz  
FIDRES 0.250967 Hz  
AQ 1.9923444 sec  
RG 87.66  
DW 60.800 usec  
DE 6.50 usec  
TE 297.8 K  
D1 1.0000000 sec  
TD0 1

===== CHANNEL f1 =====  
NUC1 1H  
P1 14.75 usec  
PLW1 11.99499989 W  
SFO1 400.1524711 MHz

F2 - Processing parameters  
SI 16384  
SF 400.1500090 MHz  
WDW EM  
SSB 0  
LB 0.30 Hz  
GB 0  
PC 1.00

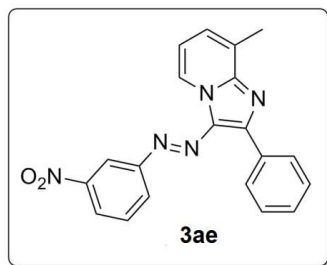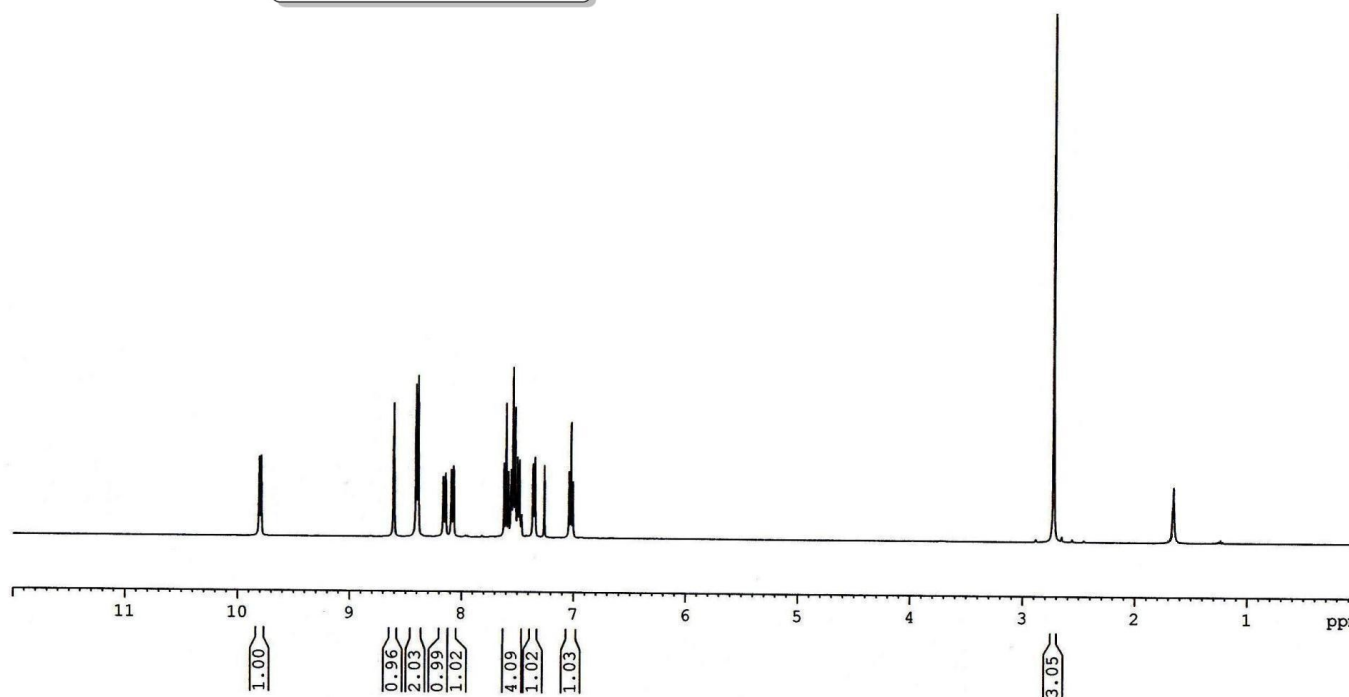

13C of VBAC-104-A

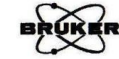

154.66  
152.75  
149.27  
147.14  
133.05  
132.52  
130.24  
129.98  
129.95  
129.80  
128.67  
127.89  
127.55  
126.77  
122.80  
117.44  
116.02

77.48  
77.16  
76.85

16.86

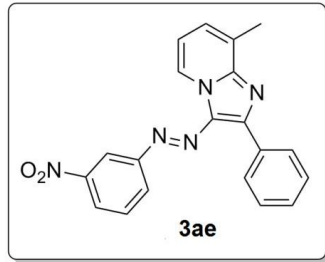

Current Data Parameters  
NAME Dr. A HAJRA 2015  
EXPNO 276  
PROCNO 1

F2 - Acquisition Parameters  
Date\_ 20150616  
Time 18.12  
INSTRUM spect  
PROBHD 5 mm PABBO BB/  
PULPROG zgpg30  
TD 32768  
SOLVENT CDCl3  
NS 400  
DS 2  
SWH 24038.461 Hz  
FIDRES 0.733596 Hz  
AQ 0.6816244 sec  
RG 87.66  
DW 20.800 usec  
DE 6.50 usec  
TE 298.9 K  
D1 2.00000000 sec  
D11 0.03000000 sec  
TD0 1

----- CHANNEL f1 -----  
NUC1 13C  
P1 8.90 usec  
PLW1 54.00000000 W  
SFO1 100.6278588 MHz

----- CHANNEL f2 -----  
CPDPRG2 waltz16  
NUC2 1H  
PCPD2 80.00 usec  
PLW2 12.00000000 W  
PLW12 0.40792999 W  
PLW13 0.26107001 W  
SFO2 400.1516006 MHz

F2 - Processing parameters  
SI 16384  
SF 100.6177838 MHz  
WDW EM  
SSB 0  
LB 1.00 Hz  
GB 0  
PC 1.40

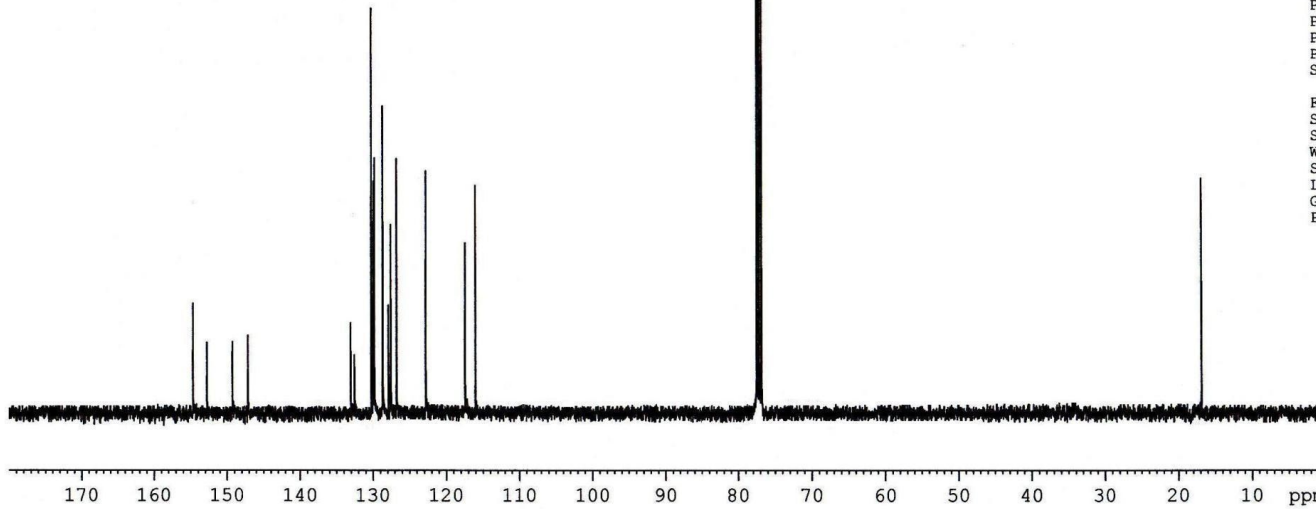

1H of VBAC-105-A

9.858  
9.841  
8.442  
8.439  
8.421  
8.164  
8.143  
7.864  
7.843  
7.551  
7.547  
7.544  
7.530  
7.511  
7.490  
7.487  
7.470  
7.451  
7.328  
7.310  
7.260  
7.005  
6.987  
6.970  
4.439  
4.422  
4.404  
4.386  
2.721  
1.449  
1.431  
1.413

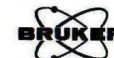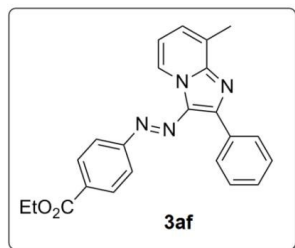

Current Data Parameters  
NAME Dr. A HAJRA 2015  
EXPNO 273  
PROCNO 1

F2 - Acquisition Parameters  
Date\_ 20150616  
Time 16.37  
INSTRUM spect  
PROBHD 5 mm PABBO BB/  
PULPROG zg30  
TD 32768  
SOLVENT CDCl3  
NS 24  
DS 2  
SWH 8223.685 Hz  
FIDRES 0.250967 Hz  
AQ 1.9923444 sec  
RG 93.46  
DW 60.800 usec  
DE 6.50 usec  
TE 297.6 K  
D1 1.00000000 sec  
TD0 1

===== CHANNEL f1 =====  
NUC1 1H  
P1 14.75 usec  
PLW1 11.99499989 W  
SFO1 400.1524711 MHz

F2 - Processing parameters  
SI 16384  
SF 400.1500090 MHz  
WDW EM  
SSB 0  
LB 0.30 Hz  
GB 0  
PC 1.00

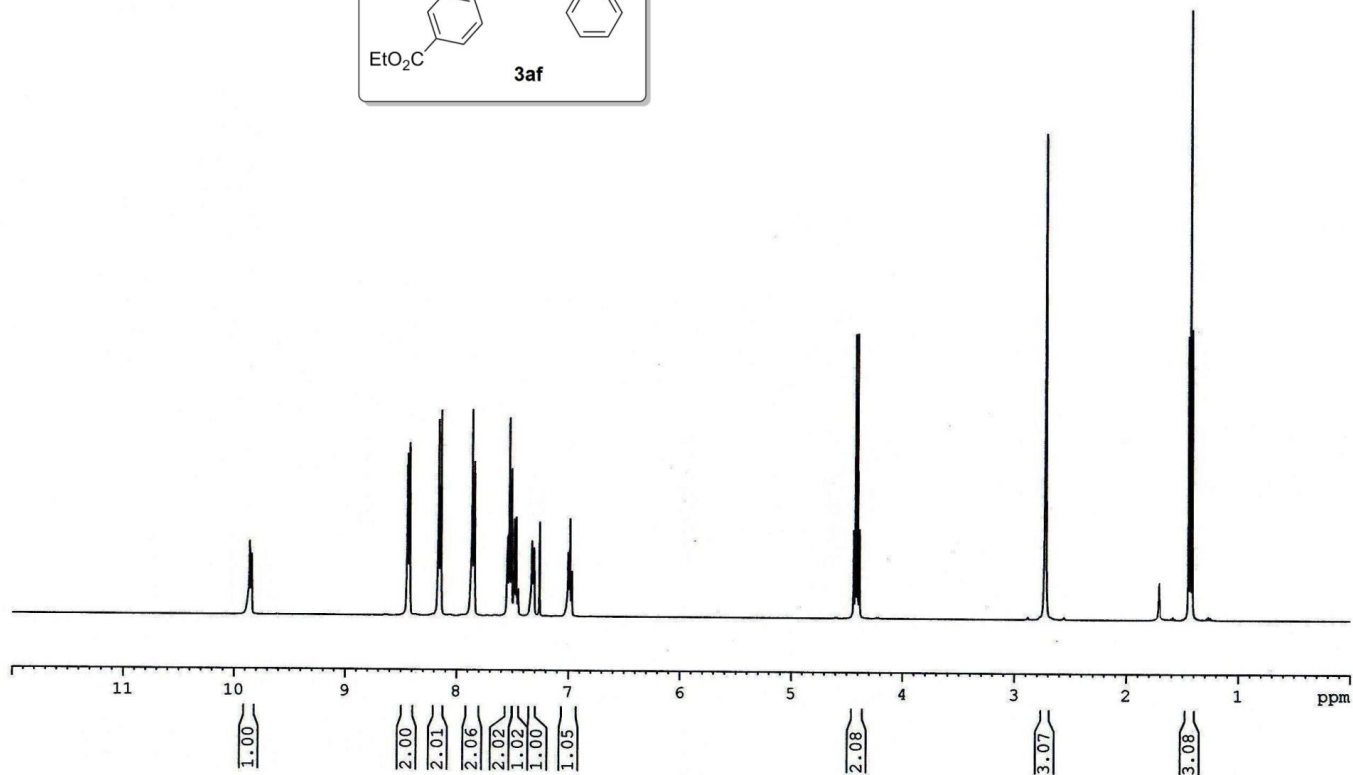

13C of VBAC-105-A

—166.40  
 —156.81  
 —152.09  
 —146.87  
 —133.28  
 —132.91  
 —130.79  
 —130.24  
 —129.57  
 —128.59  
 —127.72  
 —127.54  
 —121.76  
 —115.75

77.48  
 77.16  
 76.84  
 —61.20

16.88  
 14.51

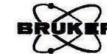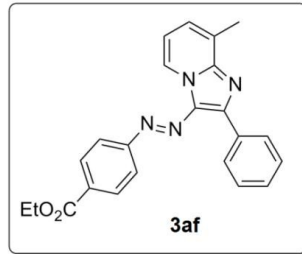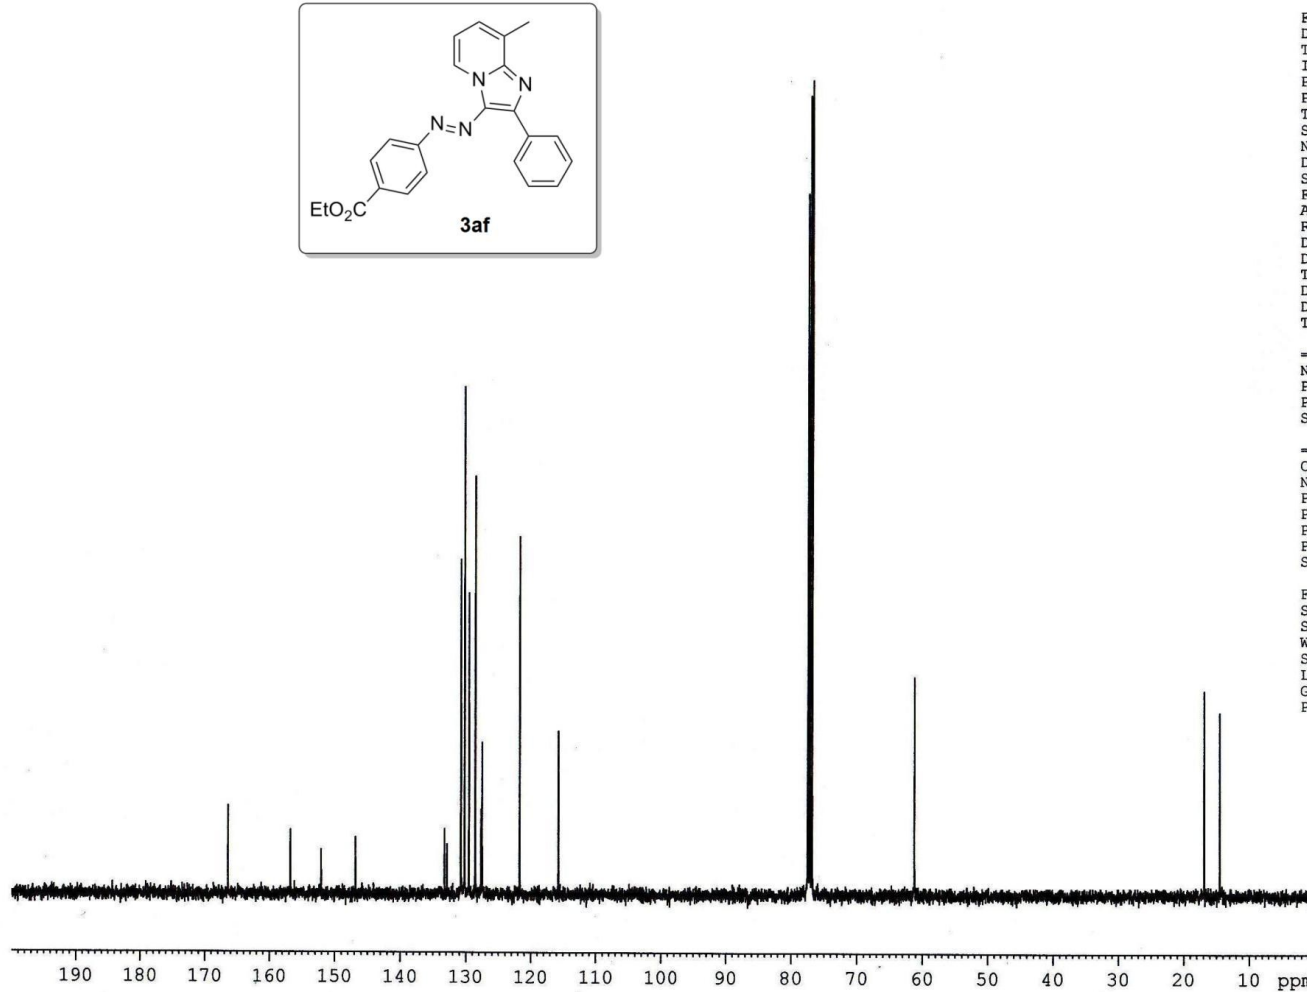

Current Data Parameters  
 NAME Dr. A HAJRA 2015  
 EXPNO 274  
 PROCNO 1

F2 - Acquisition Parameters  
 Date\_ 20150616  
 Time\_ 16.57  
 INSTRUM spect  
 PROBHD 5 mm PABBO BB/  
 PULPROG zgpg30  
 TD 32768  
 SOLVENT CDCl3  
 NS 400  
 DS 2  
 SWH 24038.461 Hz  
 FIDRES 0.733596 Hz  
 AQ 0.6816244 sec  
 RG 87.66  
 DW 20.800 usec  
 DE 6.50 usec  
 TE 298.6 K  
 D1 2.0000000 sec  
 D11 0.0300000 sec  
 TD0 1

===== CHANNEL f1 =====  
 NUC1 13C  
 P1 8.90 usec  
 PLW1 54.0000000 W  
 SFO1 100.6278588 MHz

===== CHANNEL f2 =====  
 CPDPRG2 waltz16  
 NUC2 1H  
 P1 80.00 usec  
 PLW2 12.0000000 W  
 PLW12 0.40792999 W  
 PLW13 0.26107001 W  
 SFO2 400.1516006 MHz

F2 - Processing parameters  
 SI 16384  
 SF 100.6177848 MHz  
 WDW EM  
 SSB 0  
 LB 1.00 Hz  
 GB 0  
 PC 1.40

1H of VBAC-129A

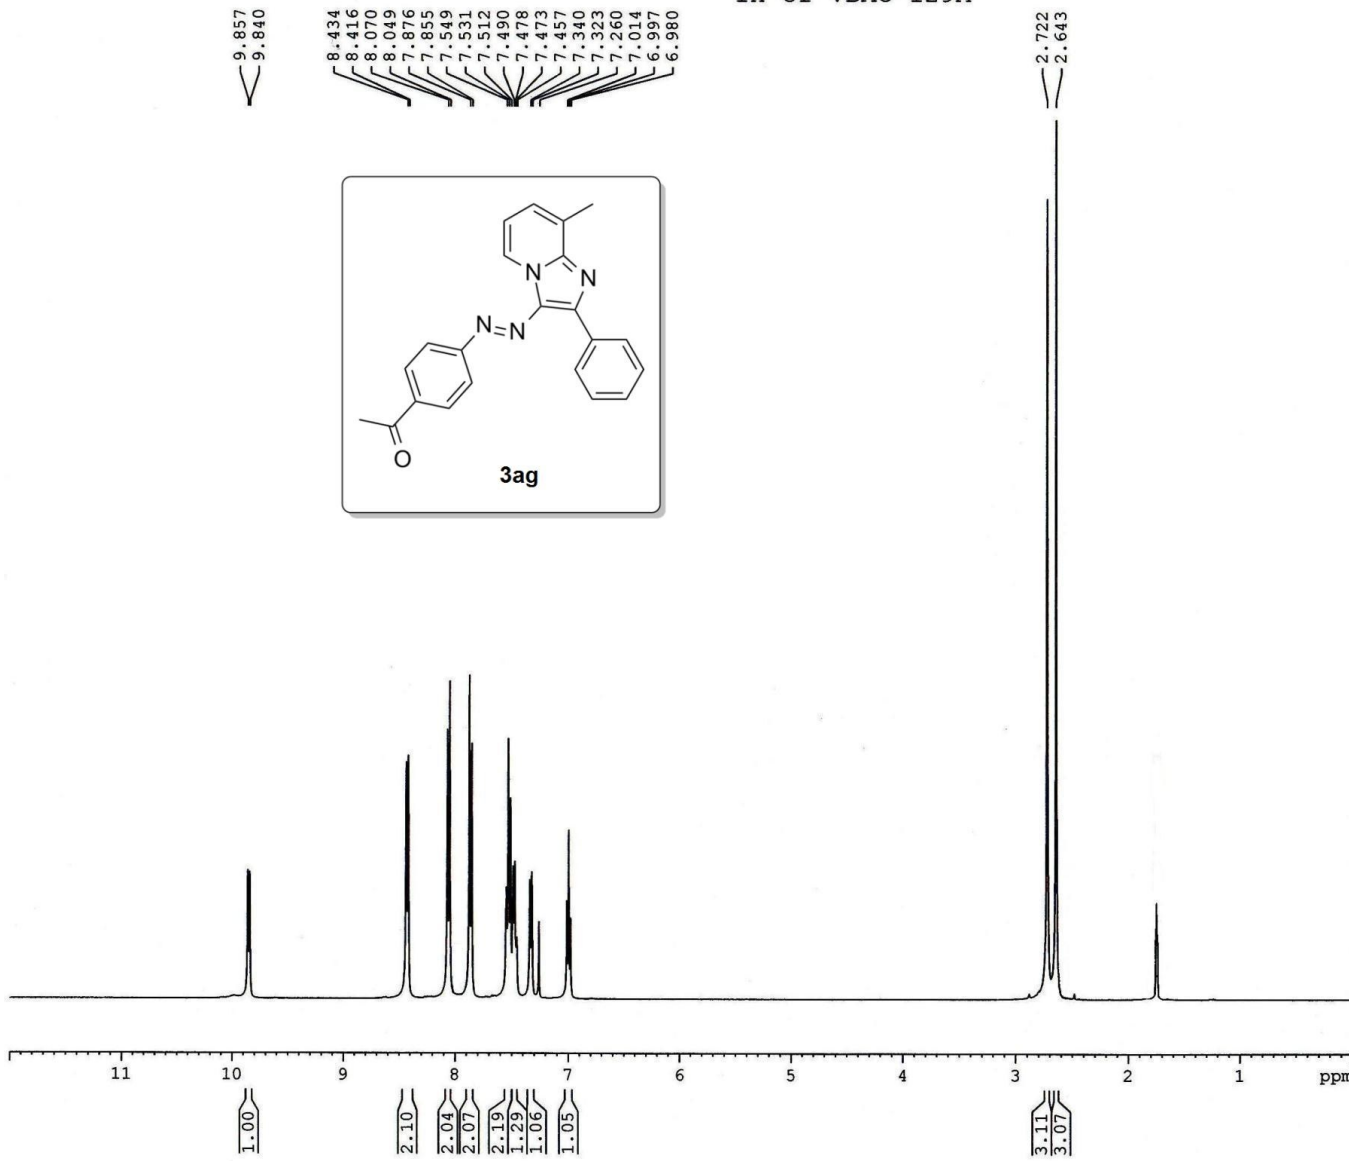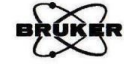

Current Data Parameters  
 NAME Dr. A HAJRA 2015  
 EXPNO 430  
 PROCNO 1

F2 - Acquisition Parameters  
 Date\_ 20150723  
 Time\_ 16.00  
 INSTRUM spect  
 PROBHD 5 mm PABBO BB/  
 PULPROG zg30  
 TD 32768  
 SOLVENT CDC13  
 NS 32  
 DS 1  
 SWH 8223.685 Hz  
 FIDRES 0.250967 Hz  
 AQ 1.9923444 sec  
 RG 87.66  
 DW 60.800 usec  
 DE 6.50 usec  
 TE 297.2 K  
 D1 1.00000000 sec  
 TD0 1

===== CHANNEL f1 =====  
 NUC1 1H  
 P1 14.75 usec  
 PLW1 11.99499989 W  
 SFO1 400.1524711 MHz

F2 - Processing parameters  
 SI 16384  
 SF 400.1500090 MHz  
 WDW EM  
 SSB 0  
 LB 0.30 Hz  
 GB 0  
 PC 1.00

— 197.37

13C of VBAC-129

156.58  
151.96  
146.70  
136.43  
133.11  
132.77  
130.11  
129.96  
129.56  
129.48  
128.47  
127.52  
127.40  
121.79  
115.65

77.48  
77.16  
76.84

— 26.77

— 16.76

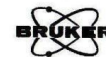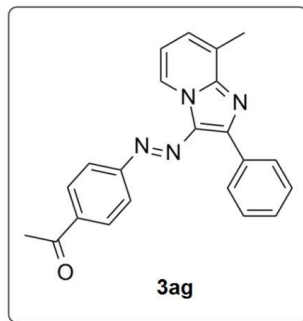

Current Data Parameters  
NAME Dr. A HAJRA 2015  
EXPNO 429  
PROCNO 1

F2 - Acquisition Parameters  
Date\_ 20150723  
Time 13.12  
INSTRUM spect  
PROBHD 5 mm FAPBO BB/  
PULPROG zgpg30  
TD 32768  
SOLVENT CDCl3  
NS 64  
DS 2  
SWH 24038.461 Hz  
FIDRES 0.733596 Hz  
AQ 0.6816244 sec  
RG 40.87  
DW 20.800 usec  
DE 6.50 usec  
TE 297.6 K  
D1 2.00000000 sec  
D11 0.03000000 sec  
TDO 1

===== CHANNEL f1 =====  
NUC1 13C  
P1 8.90 usec  
PLW1 54.00000000 W  
SFO1 100.6278588 MHz

===== CHANNEL f2 =====  
CPDPRG2 waltz16  
NUC2 1H  
PCPD2 80.00 usec  
PLW2 12.00000000 W  
PLW12 0.40792999 W  
PLW13 0.26107001 W  
SFO2 400.1516006 MHz

F2 - Processing parameters  
SI 16384  
SF 100.6177928 MHz  
WDW EM  
SSB 0  
LB 1.00 Hz  
GB 0  
PC 1.40

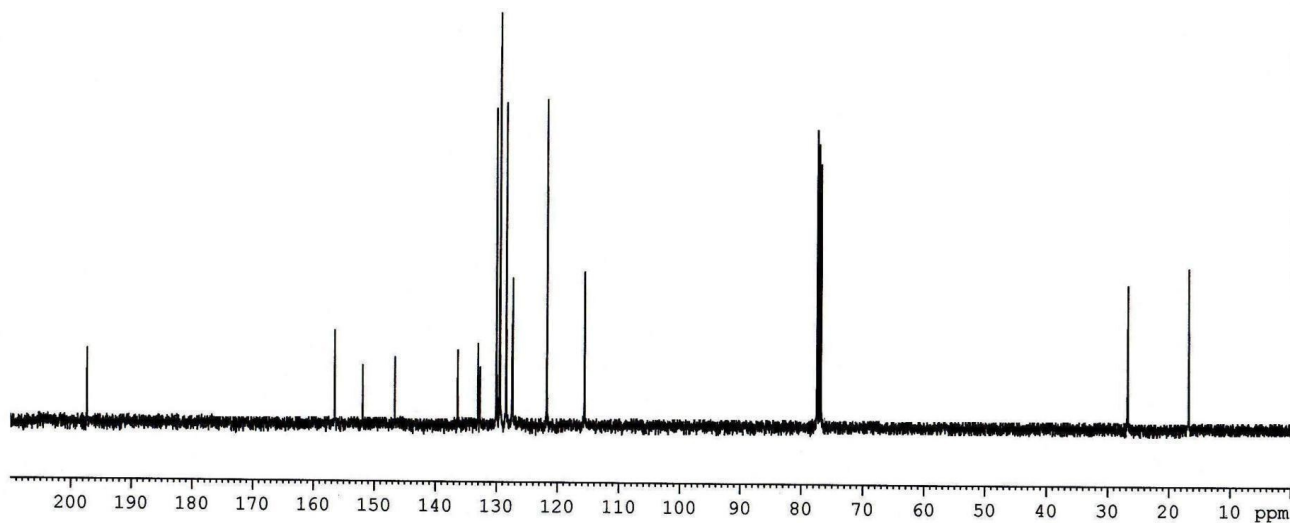



1H of VBAC-133

8.620  
8.603  
8.377  
8.373  
8.356  
7.923  
7.905  
7.888  
7.885  
7.657  
7.654  
7.638  
7.636  
7.633  
7.619  
7.615  
7.609  
7.606  
7.590  
7.587  
7.553  
7.550  
7.546  
7.532  
7.528  
7.523  
7.521  
7.513  
7.505  
7.491  
7.486  
7.484  
7.474  
7.466  
7.432  
7.412  
7.398  
7.394  
7.260  
7.221  
7.204  
6.589  
6.571  
6.554

— 2.686

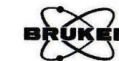

Current Data Parameters  
NAME Dr. A HAJRA 2015  
EXPNO 532  
PROCNO 1

F2 - Acquisition Parameters  
Date\_ 20150813  
Time 17.07  
INSTRUM spect  
PROBHD 5 mm PABBO BB/  
PULPROG zg30  
TD 32768  
SOLVENT CDC13  
NS 32  
DS 1  
SWH 8223.685 Hz  
FIDRES 0.250967 Hz  
AQ 1.9923444 sec  
RG 120.16  
DW 60.800 usec  
DE 6.50 usec  
TE 297.7 K  
D1 1.0000000 sec  
TDO 1

===== CHANNEL f1 =====  
NUC1 1H  
P1 14.75 usec  
PLW1 11.99499989 W  
SF01 400.1524711 MHz

F2 - Processing parameters  
SI 16384  
SF 400.1500090 MHz  
WDW EM  
SSB 0  
LB 0.30 Hz  
GB 0  
PC 1.00

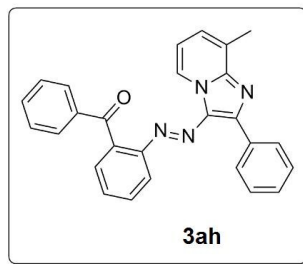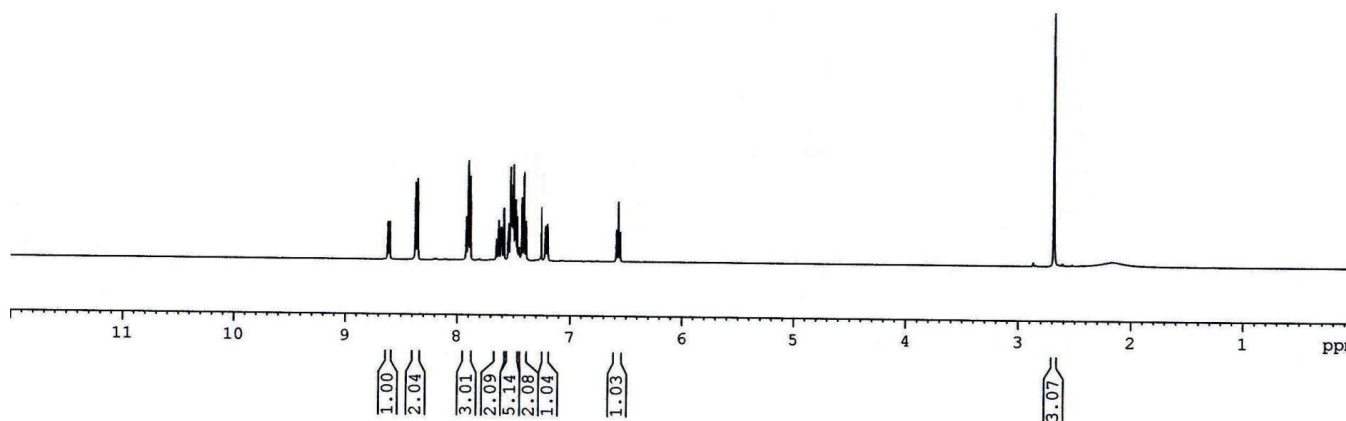



13C of VBAC-133

— 198.19

151.76  
146.00  
138.36  
137.79  
133.37  
132.66  
132.62  
131.22  
130.33  
130.12  
129.82  
129.73  
129.41  
128.94  
128.66  
128.62  
127.19  
127.00  
116.27  
115.60

77.48  
77.16  
76.84

— 16.98

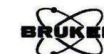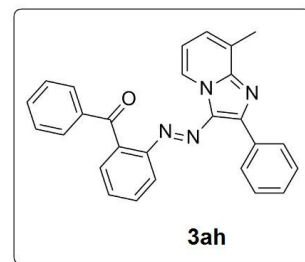

Current Data Parameters  
 NAME Dr. A HAJRA 2015  
 EXPNO 534  
 PROCNO 1

F2 - Acquisition Parameters  
 Date\_ 20150813  
 Time\_ 17.53  
 INSTRUM spect  
 PROBHD 5 mm PABBO BB/  
 PULPROG zgpg30  
 TD 32768  
 SOLVENT CDC13  
 NS 320  
 DS 2  
 SWH 24038.461 Hz  
 FIDRES 0.733596 Hz  
 AQ 0.6816244 sec  
 RG 120.16  
 DW 20.800 usec  
 DE 6.50 usec  
 TE 298.7 K  
 D1 2.00000000 sec  
 D11 0.03000000 sec  
 TD0 1

===== CHANNEL f1 =====  
 NUC1 13C  
 P1 8.90 usec  
 PLW1 54.00000000 W  
 SFO1 100.6278588 MHz

===== CHANNEL f2 =====  
 CPDPRG2 waltz16  
 NUC2 1H  
 PCDP2 80.00 usec  
 PLW2 12.00000000 W  
 PLW12 0.40792999 W  
 PLW13 0.26107001 W  
 SFO2 400.1516006 MHz

F2 - Processing parameters  
 SI 16384  
 SF 100.6177836 MHz  
 WDW EM  
 SSB 0  
 LB 1.00 Hz  
 GB 0  
 PC 1.40

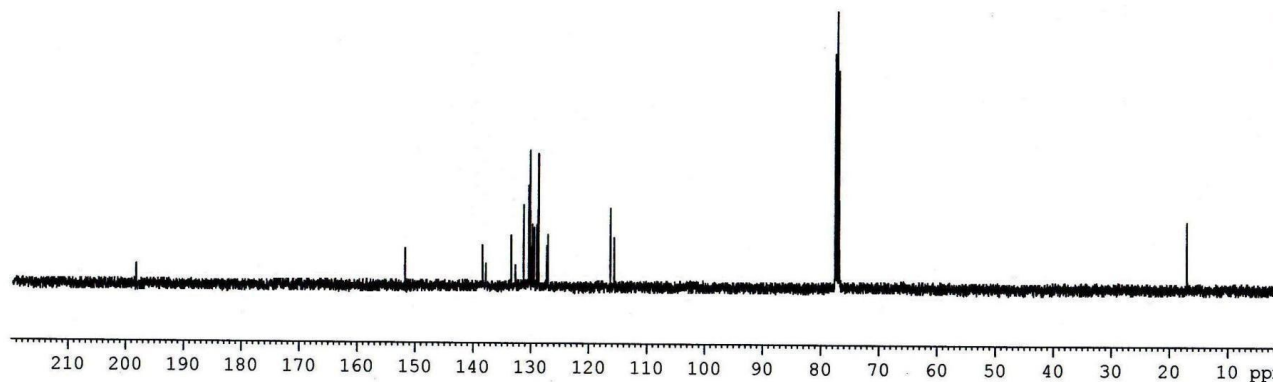

1H of VBAC-101

9.826  
9.809  
8.420  
8.417  
8.399  
8.397  
7.790  
7.786  
7.773  
7.769  
7.545  
7.541  
7.527  
7.524  
7.508  
7.482  
7.479  
7.476  
7.466  
7.460  
7.457  
7.446  
7.440  
7.435  
7.317  
7.300  
7.280  
6.995  
6.978  
6.960

— 2.733

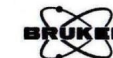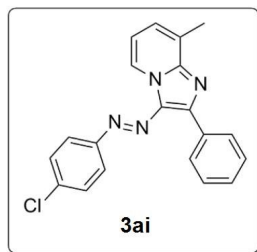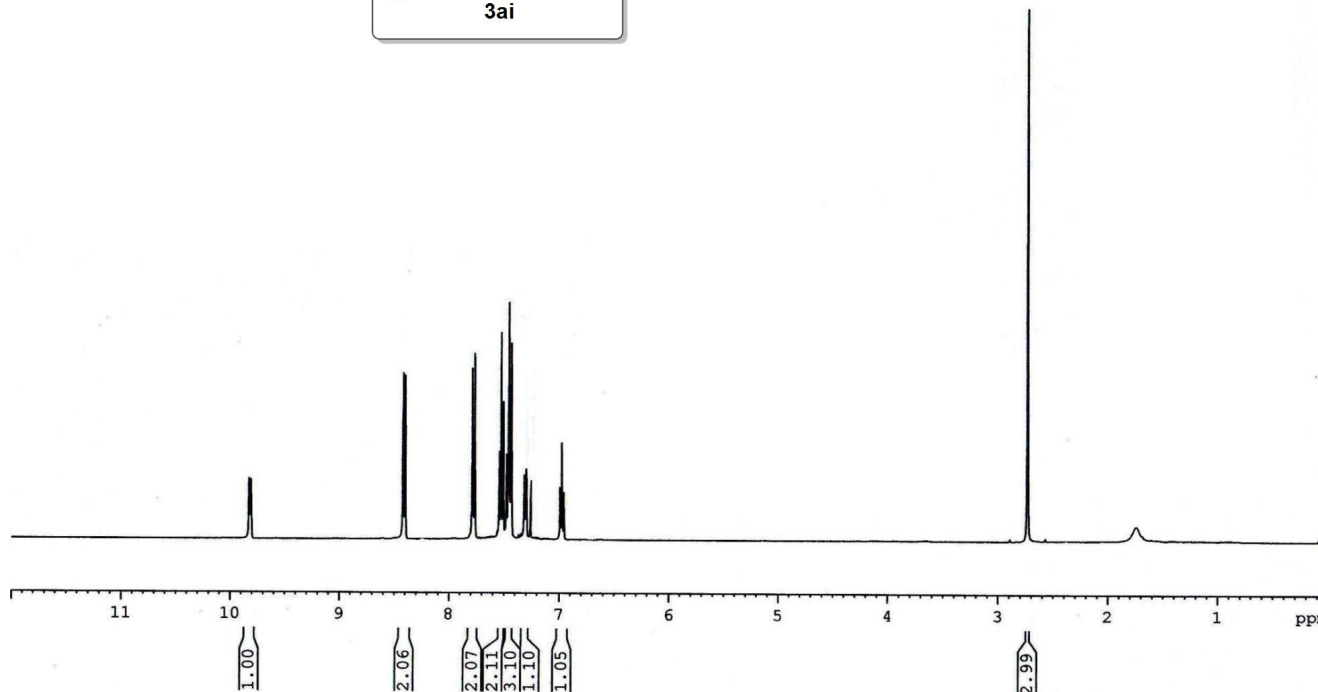

Current Data Parameters  
NAME Dr. A HAJRA 2015  
EXPNO 228  
PROCNO 1

F2 - Acquisition Parameters  
Date 20150525  
Time 16.09  
INSTRUM spect  
PROBHD 5 mm PABBO BB/  
PULPROG zg30  
TD 32768  
SOLVENT CDCl3  
NS 32  
DS 2  
SWH 8223.685 Hz  
FIDRES 0.250967 Hz  
AQ 1.9923444 sec  
RG 120.16  
DW 60.800 usec  
DE 6.50 usec  
TE 300.6 K  
D1 1.00000000 sec  
TD0 1

===== CHANNEL f1 =====  
NUC1 1H  
P1 14.75 usec  
PLW1 11.99499989 W  
SFO1 400.1524711 MHz

F2 - Processing parameters  
SI 16384  
SF 400.1500090 MHz  
WDW EM  
SSB 0  
LB 0.30 Hz  
GB 0  
PC 1.00

13C of VBAC-101

152.47  
151.05  
146.52  
134.82  
133.37  
130.20  
129.47  
129.40  
129.06  
128.58  
127.68  
127.30  
123.23  
115.50

77.47  
77.16  
76.84

16.93

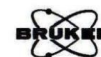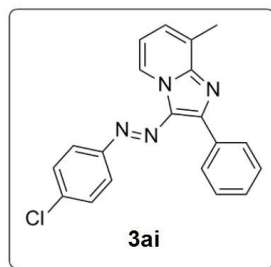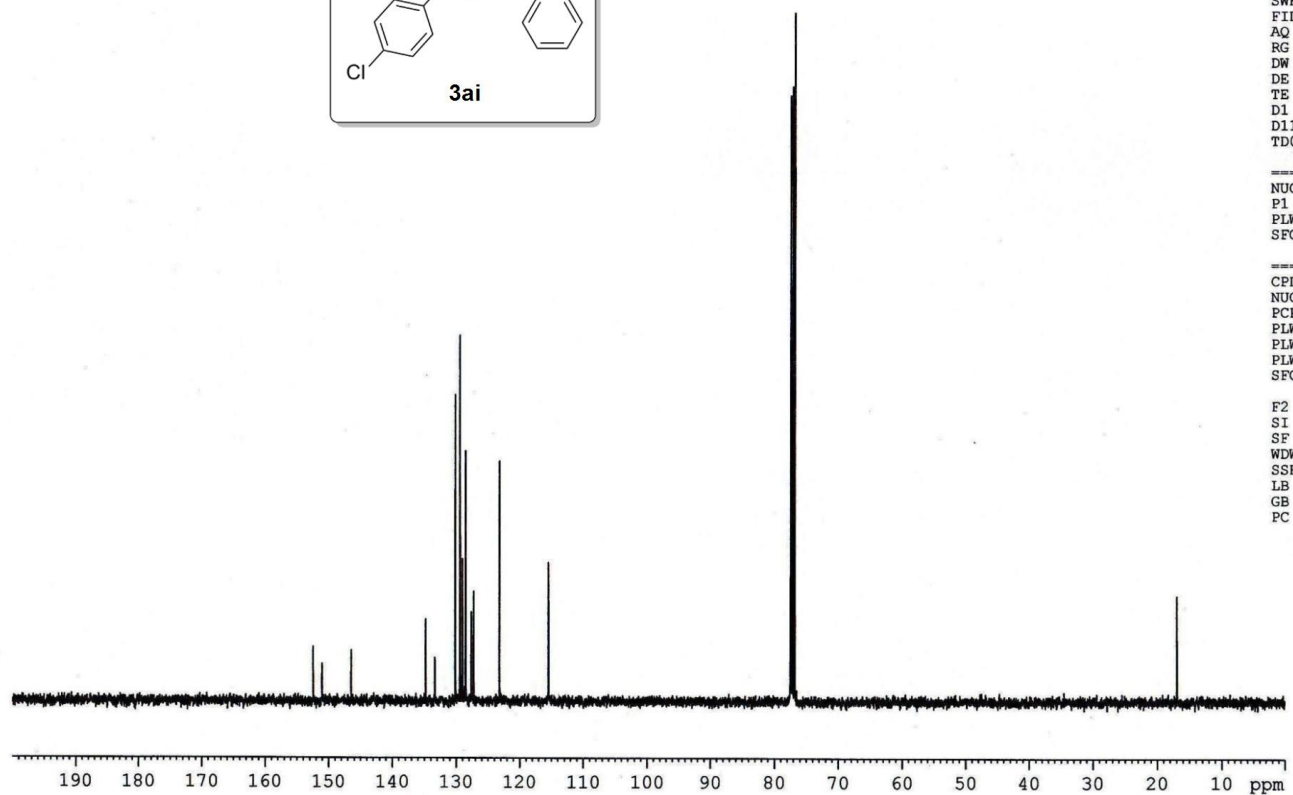

Current Data Parameters  
NAME Dr. A HAJRA 2015  
EXPNO 229  
PROCNO 1

F2 - Acquisition Parameters  
Date\_ 20150525  
Time 16.38  
INSTRUM spect  
PROBHD 5 mm PABBO BB/  
PULPROG zgpg30  
TD 32768  
SOLVENT CDCl3  
NS 512  
DS 2  
SWH 24038.461 Hz  
FIDRES 0.733596 Hz  
AQ 0.6816244 sec  
RG 120.16  
DW 20.800 usec  
DE 6.50 usec  
TE 301.8 K  
D1 2.00000000 sec  
D11 0.03000000 sec  
TD0 1

===== CHANNEL f1 =====  
NUC1 13C  
P1 8.90 usec  
PLW1 54.00000000 W  
SF01 100.6278588 MHz

===== CHANNEL f2 =====  
CPDPRG2 waltz16  
NUC2 1H  
PCPD2 80.00 usec  
PLW2 12.00000000 W  
PLW12 0.40792999 W  
PLW13 0.26107001 W  
SFO2 400.1516006 MHz

F2 - Processing parameters  
SI 16384  
SF 100.6177831 MHz  
WDW EM  
SSB 0  
LB 1.00 Hz  
GB 0  
PC 1.40

1H of AC 102B

9.760  
9.743  
8.418  
8.414  
8.409  
8.396  
8.393  
7.826  
7.821  
7.812  
7.808  
7.803  
7.795  
7.790  
7.545  
7.541  
7.537  
7.524  
7.520  
7.508  
7.505  
7.476  
7.472  
7.469  
7.454  
7.440  
7.436  
7.433  
7.260  
7.256  
7.254  
7.239  
7.237  
7.175  
7.170  
7.153  
7.137  
7.132  
6.933  
6.915  
6.898

2.707

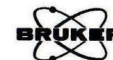

Current Data Parameters  
NAME Dr. A HAJRA 2015  
EXPNO 245  
PROCNO 1

F2 - Acquisition Parameters  
Date\_ 20150529  
Time 17.58  
INSTRUM spect  
PROBHD 5 mm PABBO BB/  
PULPROG zg30  
TD 32768  
SOLVENT CDCl3  
NS 16  
DS 2  
SWH 8223.685 Hz  
FIDRES 0.250967 Hz  
AQ 1.9923444 sec  
RG 62.69  
DW 60.800 usec  
DE 6.50 usec  
TE 297.1 K  
D1 1.0000000 sec  
TDO 1

===== CHANNEL f1 =====  
NUC1 1H  
P1 14.75 usec  
PLW1 11.99499989 W  
SFO1 400.1524711 MHz

F2 - Processing parameters  
SI 16384  
SF 400.1500090 MHz  
WDW EM  
SSB 0  
LB 0.30 Hz  
GB 0  
PC 1.00

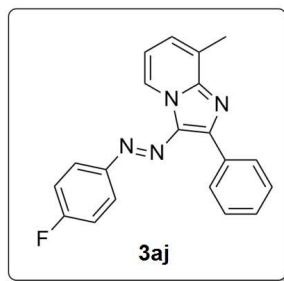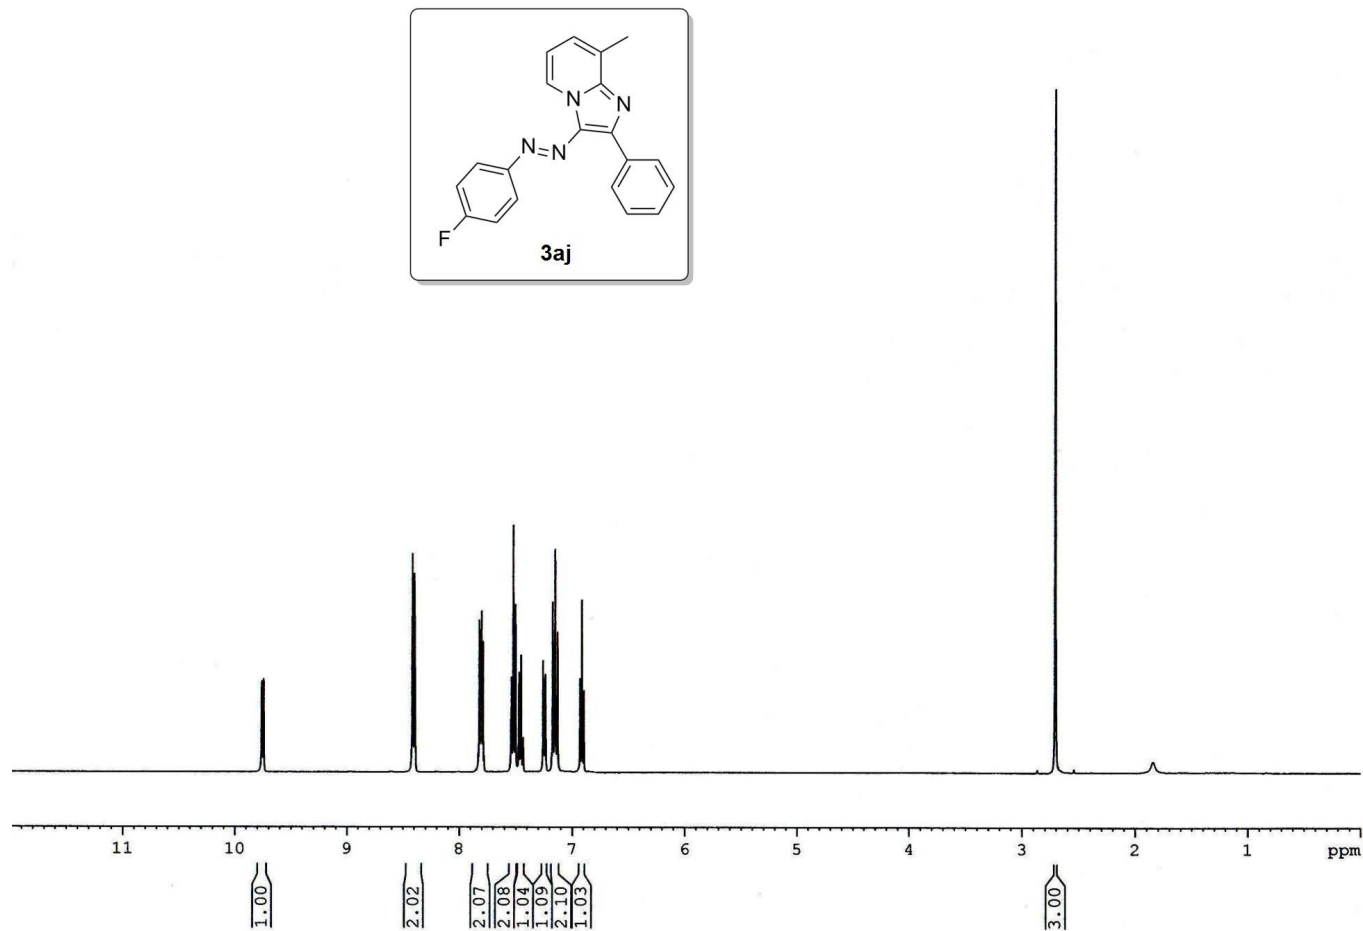

13C of VBAC-102-B

164.49  
162.00  
150.49  
150.43  
150.41  
146.26  
133.48  
132.42  
130.11  
129.20  
128.62  
128.50  
127.53  
127.11  
123.71  
123.62  
116.21  
115.98  
115.23

77.47  
77.16  
76.84

16.89

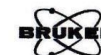

Current Data Parameters  
NAME Dr. A HAJRA 2015  
EXPNO 246  
PROCNO 1

F2 - Acquisition Parameters  
Date\_ 20150529  
Time 18.07  
INSTRUM spect  
PROBHD 5 mm PABBO BB/  
PULPROG zgpg30  
TD 32768  
SOLVENT CDC13  
NS 200  
DS 2  
SWH 24038.461 Hz  
FIDRES 0.733596 Hz  
AQ 0.6816244 sec  
RG 62.69  
DW 20.800 usec  
DE 6.50 usec  
TE 297.6 K  
D1 2.00000000 sec  
D11 0.03000000 sec  
TD0 1

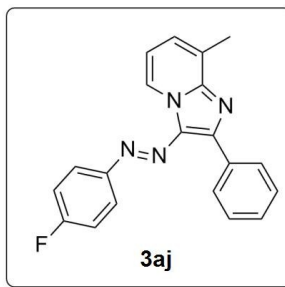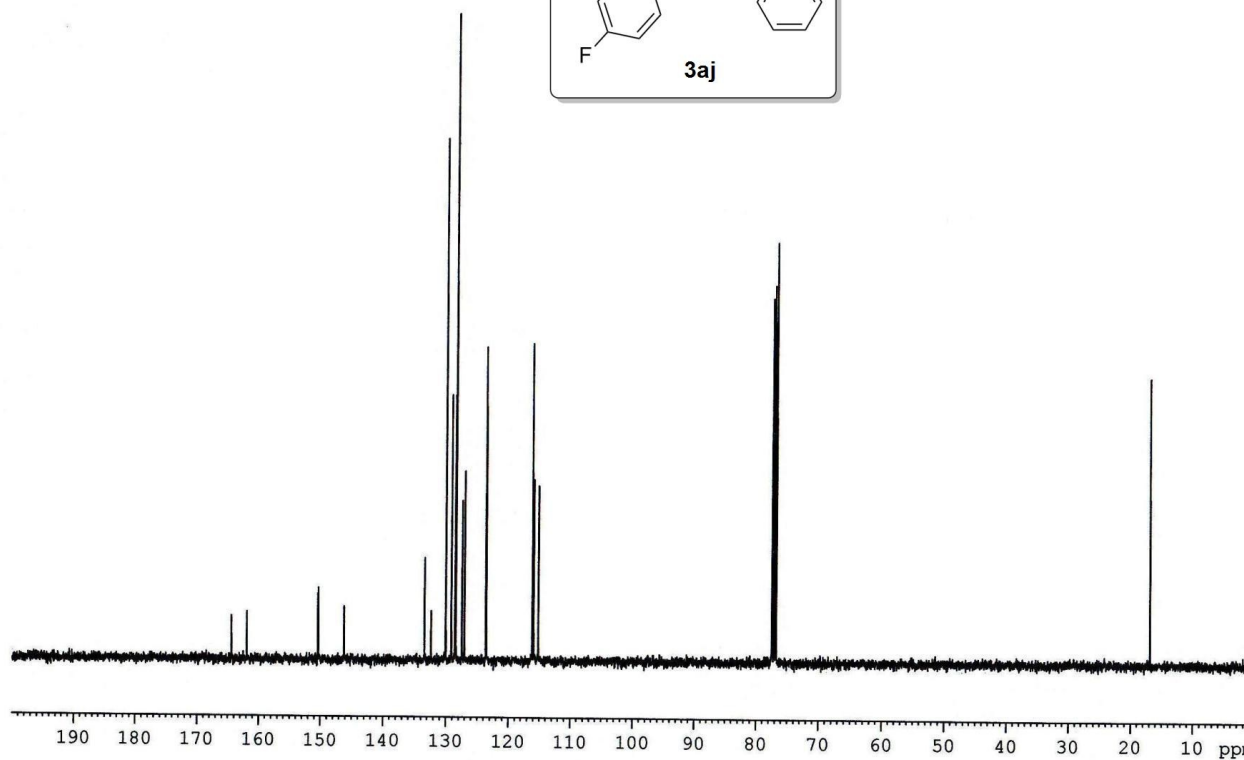

===== CHANNEL f1 =====  
NUC1 13C  
P1 8.90 usec  
PLW1 54.00000000 W  
SFO1 100.6278588 MHz

===== CHANNEL f2 =====  
CPDPRG2 waltz16  
NUC2 1H  
PCPD2 80.00 usec  
PLW2 12.00000000 W  
PLW12 0.40792999 W  
PLW13 0.26107001 W  
SFO2 400.1516006 MHz

F2 - Processing parameters  
SI 16384  
SF 100.6177880 MHz  
WDW EM  
SSB 0  
LB 1.00 Hz  
GB 0  
PC 1.40

1H of VBAC-103

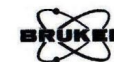

10.142  
10.126

8.451  
8.448  
8.431  
8.011  
7.991  
7.766  
7.746  
7.551  
7.534  
7.515  
7.486  
7.468  
7.462  
7.449  
7.431  
7.411  
7.366  
7.348  
7.260  
7.081  
7.062  
7.044

2.742

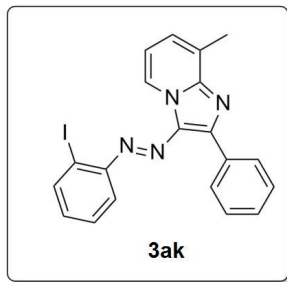

Current Data Parameters  
NAME Dr. A HAJRA 2015  
EXPNO 250  
PROCNO 1

F2 - Acquisition Parameters  
Date\_ 20150531  
Time 15.58  
INSTRUM spect  
PROBHD 5 mm PABBO BB/  
PULPROG zg30  
TD 32768  
SOLVENT CDCl3  
NS 32  
DS 2  
SWH 8223.685 Hz  
FIDRES 0.250967 Hz  
AQ 1.9923444 sec  
RG 87.66  
DW 60.800 usec  
DE 6.50 usec  
TE 296.9 K  
D1 1.00000000 sec  
TD0 1

===== CHANNEL f1 =====  
NUC1 1H  
P1 14.75 usec  
PLW1 11.99499989 W  
SFO1 400.1524711 MHz

F2 - Processing parameters  
SI 16384  
SF 400.1500090 MHz  
WDW EM  
SSB 0  
LB 0.30 Hz  
GB 0  
PC 1.00

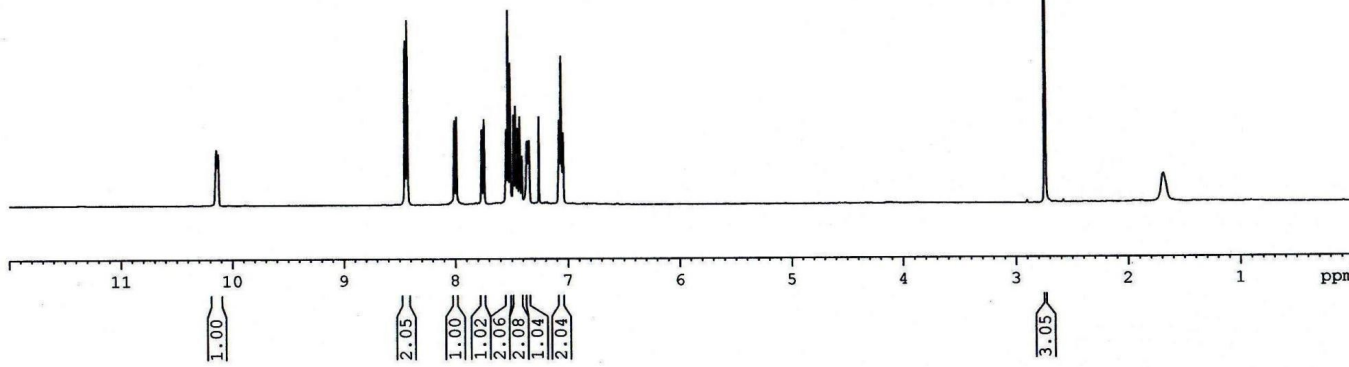

13C of VBAC-103

153.12  
152.05  
146.86  
139.75  
133.37  
133.02  
130.40  
130.27  
129.68  
129.49  
129.10  
128.66  
128.59  
127.54  
117.19  
116.02  
— 101.51

77.48  
77.16  
76.84

— 16.91

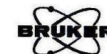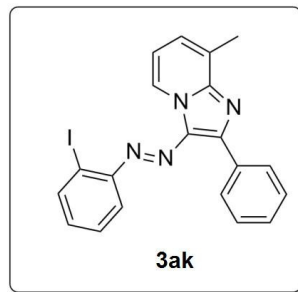

Current Data Parameters  
NAME Dr. A HAJRA 2015  
EXPNO 251  
PROCNO 1

F2 - Acquisition Parameters  
Date\_ 20150531  
Time 16.24  
INSTRUM spect  
PROBHD 5 mm PABBO BB/  
PULPROG zgpg30  
TD 32768  
SOLVENT CDCl3  
NS 512  
DS 2  
SWH 24038.461 Hz  
FIDRES 0.733596 Hz  
AQ 0.6816244 sec  
RG 87.66  
DW 20.800 usec  
DE 6.50 usec  
TE 298.2 K  
D1 2.00000000 sec  
D11 0.03000000 sec  
TD0 1

===== CHANNEL f1 =====  
NUC1 13C  
P1 8.90 usec  
PLW1 54.00000000 W  
SFO1 100.6278588 MHz

===== CHANNEL f2 =====  
CPDPRG2 waltz16  
NUC2 1H  
PCPD2 80.00 usec  
PLW2 12.00000000 W  
PLW12 0.40792999 W  
PLW13 0.26107001 W  
SFO2 400.1516006 MHz

F2 - Processing parameters  
SI 16384  
SF 100.6177851 MHz  
WDW EM  
SSB 0  
LB 1.00 Hz  
GB 0  
PC 1.40

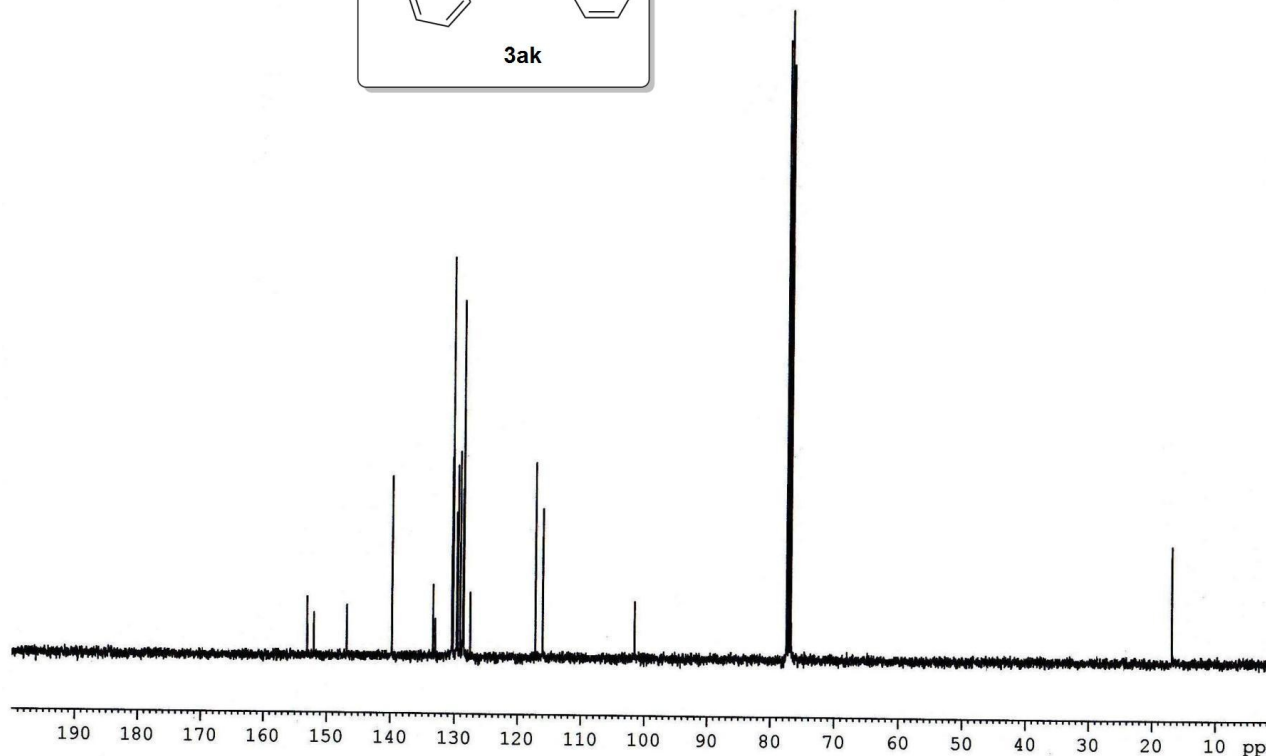



1H of VBAC-154

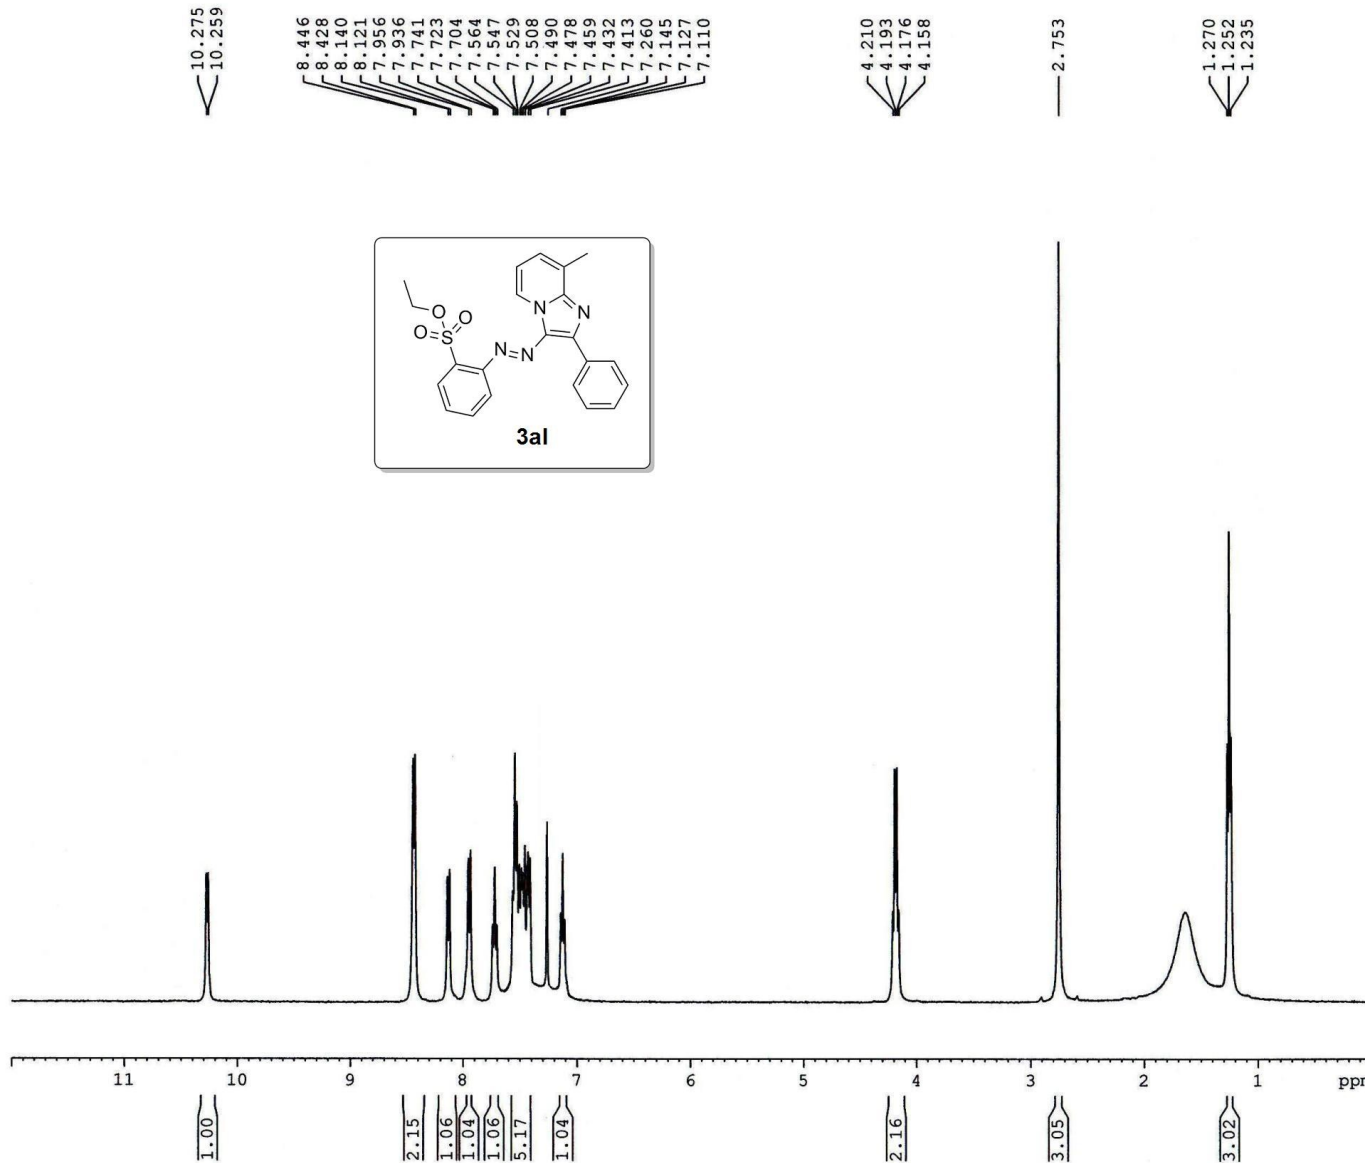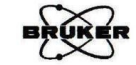

Current Data Parameters  
 NAME Dr. A HAJRA 2015  
 EXPNO 617  
 PROCNO 1

F2 - Acquisition Parameters  
 Date\_ 20150915  
 Time 12.15  
 INSTRUM spect  
 PROBHD 5 mm PABBO BB/  
 PULPROG zg30  
 TD 32768  
 SOLVENT CDC13  
 NS 32  
 DS 1  
 SWH 8223.685 Hz  
 FIDRES 0.250967 Hz  
 AQ 1.9923444 sec  
 RG 135.7  
 DW 60.800 usec  
 DE 6.50 usec  
 TE 297.2 K  
 D1 1.00000000 sec  
 TD0 1

==== CHANNEL f1 =====  
 NUC1 1H  
 P1 14.75 usec  
 PLW1 11.99499989 W  
 SFO1 400.1524711 MHz

F2 - Processing parameters  
 SI 16384  
 SF 400.1500100 MHz  
 WDW EM  
 SSB 0  
 LB 0.30 Hz  
 GB 0  
 PC 1.00



SG-154-13C-22sep15-30- (SR)

143.82  
132.93  
131.69  
131.11  
130.61  
130.07  
129.94  
129.79  
129.35  
128.82  
128.37  
127.68  
127.01  
125.06  
123.29  
117.09  
114.20

56.14

40.10  
39.90  
39.69  
39.49  
39.28  
39.07  
38.87

18.57  
16.30

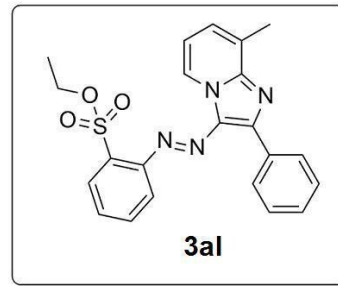

Current Data Parameters  
NAME Sep22-2015  
EXPNO 30  
PROCNO 1

F2 - Acquisition Parameters  
Date\_ 20150922  
Time 22.55  
INSTRUM spect  
PROBHD 5 mm PABBO BB/  
PULPROG zgpg30  
TD 32768  
SOLVENT DMSO  
NS 4000  
DS 4  
SWH 24038.461 Hz  
FIDRES 0.733596 Hz  
AQ 0.6815744 sec  
RG 203  
DW 20.800 usec  
DE 6.50 usec  
TE 0 K  
D1 2.0000000 sec  
D11 0.03000000 sec  
TD0 1

==== CHANNEL f1 =====  
SFO1 100.6404326 MHz  
NUC1 13C  
P1 9.00 usec  
PLW1 55.0000000 W

==== CHANNEL f2 =====  
SFO2 400.2016008 MHz  
NUC2 1H  
CPDPRG[2] waltz16  
PCPD2 90.00 usec  
PLW2 10.0000000 W  
PLW12 0.29660001 W  
PLW13 0.24025001 W

F2 - Processing parameters  
SI 32768  
SF 100.6304110 MHz  
WDW EM  
SSB 0  
LB 3.00 Hz  
GB 0  
PC 1.40

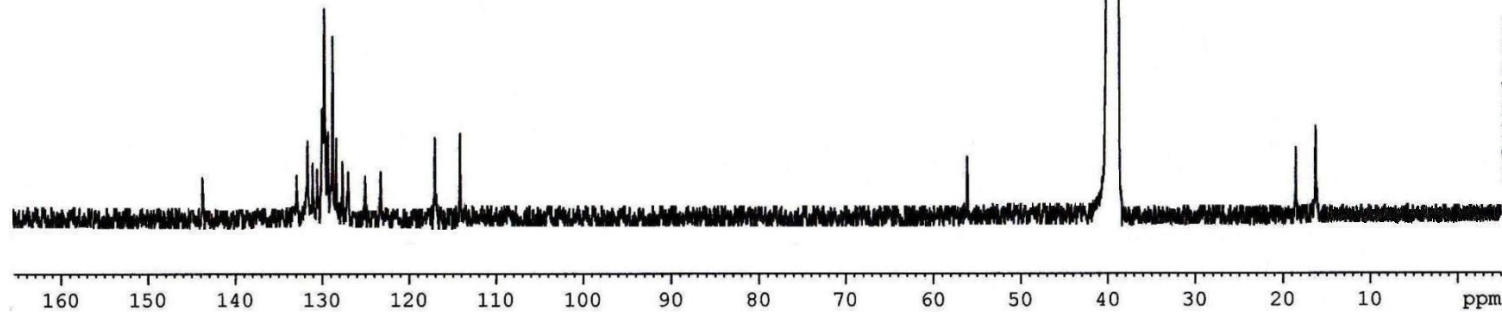

1H of VBAC-138

10.068

8.405  
8.402  
8.385  
8.196  
8.175  
7.910  
7.888  
7.752  
7.728  
7.555  
7.538  
7.519  
7.509  
7.498  
7.493  
7.476  
7.474  
7.260

4.449  
4.431  
4.414  
4.396

1.454  
1.436  
1.419

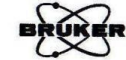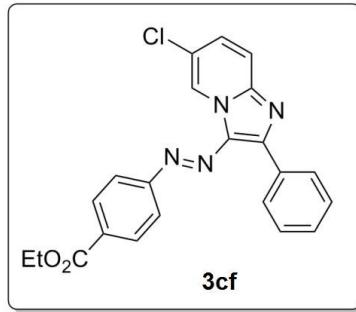

Current Data Parameters  
NAME Dr. A HAJRA 2015  
EXPNO 548  
PROCNO 1

F2 - Acquisition Parameters  
Date\_ 20150820  
Time 18.32  
INSTRUM spect  
PROBHD 5 mm PABBO BB/  
PULPROG zg30  
TD 32768  
SOLVENT CDCl3  
NS 24  
DS 1  
SWH 8223.685 Hz  
FIDRES 0.250967 Hz  
AQ 1.9923444 sec  
RG 135.7  
DW 60.800 usec  
DE 6.50 usec  
TE 298.2 K  
D1 1.00000000 sec  
TD0 1

===== CHANNEL f1 =====  
NUC1 1H  
P1 14.75 usec  
PLW1 11.99499989 W  
SFO1 400.1524711 MHz

F2 - Processing parameters  
SI 16384  
SF 400.1500090 MHz  
WDW EM  
SSB 0  
LB 0.30 Hz  
GB 0  
PC 1.00

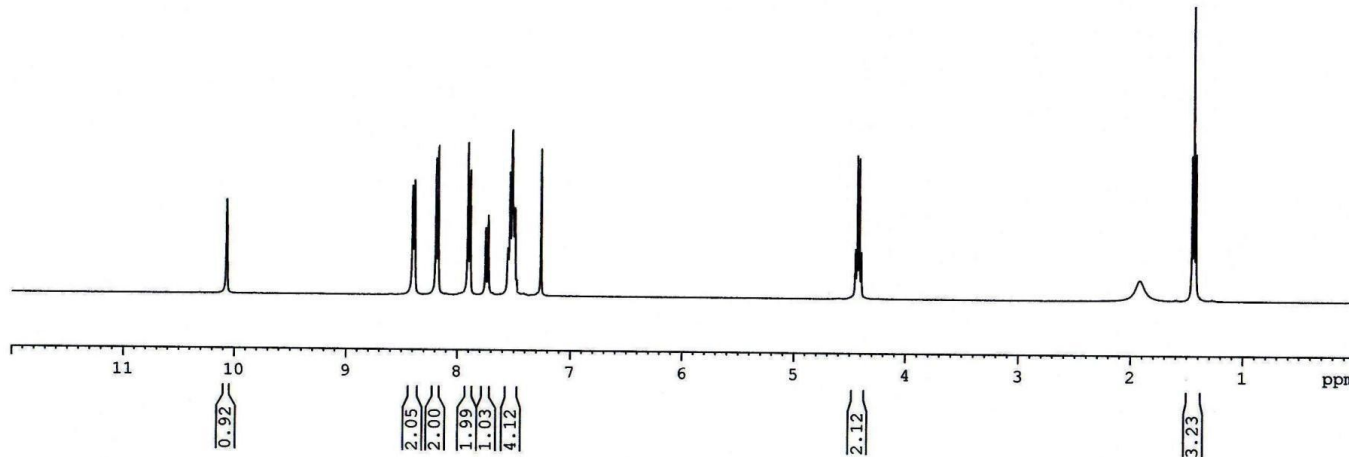

13C of VBAC-138

166.26  
 156.35  
 144.70  
 132.37  
 132.33  
 131.38  
 131.07  
 130.88  
 130.15  
 130.10  
 128.78  
 127.54  
 123.76  
 122.04  
 117.86

77.48  
 77.16  
 76.84  
 61.33

14.50

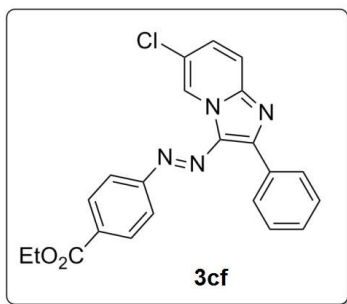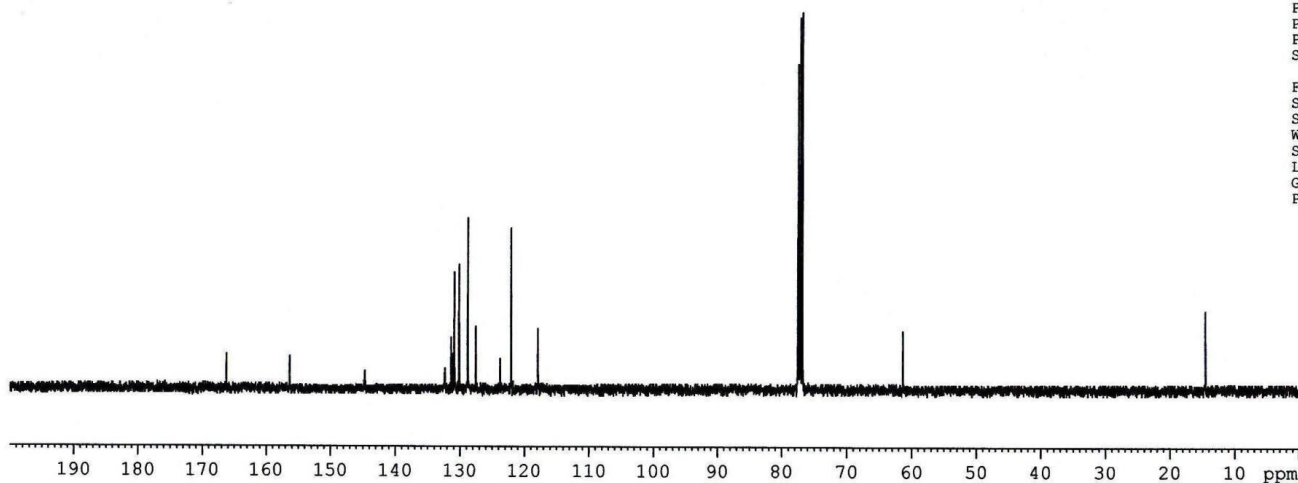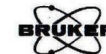

Current Data Parameters  
 NAME Dr. A HAJRA 2015  
 EXPNO 549  
 PROCNO 1

F2 - Acquisition Parameters  
 Date\_ 20150820  
 Time\_ 18.51  
 INSTRUM spect  
 PROBHD 5 mm PABBO BB/  
 PULPROG zgpg30  
 TD 32768  
 SOLVENT CDCl3  
 NS 320  
 DS 2  
 SWH 24038.461 Hz  
 FIDRES 0.733596 Hz  
 AQ 0.6816244 sec  
 RG 87.66  
 DW 20.800 usec  
 DE 6.50 usec  
 TE 299.1 K  
 D1 2.00000000 sec  
 D11 0.03000000 sec  
 TD0 1

----- CHANNEL f1 -----  
 NUC1 13C  
 P1 8.90 usec  
 PLW1 54.00000000 W  
 SFO1 100.6278588 MHz

----- CHANNEL f2 -----  
 CPDPRG2 waltz16  
 NUC2 1H  
 PCPD2 80.00 usec  
 PLW2 12.00000000 W  
 PLW12 0.40792999 W  
 PLW13 0.26107001 W  
 SFO2 400.1516006 MHz

F2 - Processing parameters  
 SI 16384  
 SF 100.6177836 MHz  
 WDW EM  
 SSB 0  
 LB 1.00 Hz  
 GB 0  
 PC 1.40

1H of VBAC-112-A

10.157  
10.154

8.419  
8.415  
8.398  
7.805  
7.784  
7.649  
7.626  
7.544  
7.537  
7.532  
7.527  
7.508  
7.481  
7.463  
7.326  
7.306  
7.260

2.443

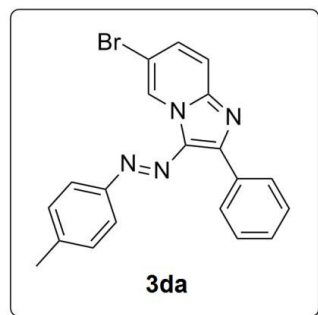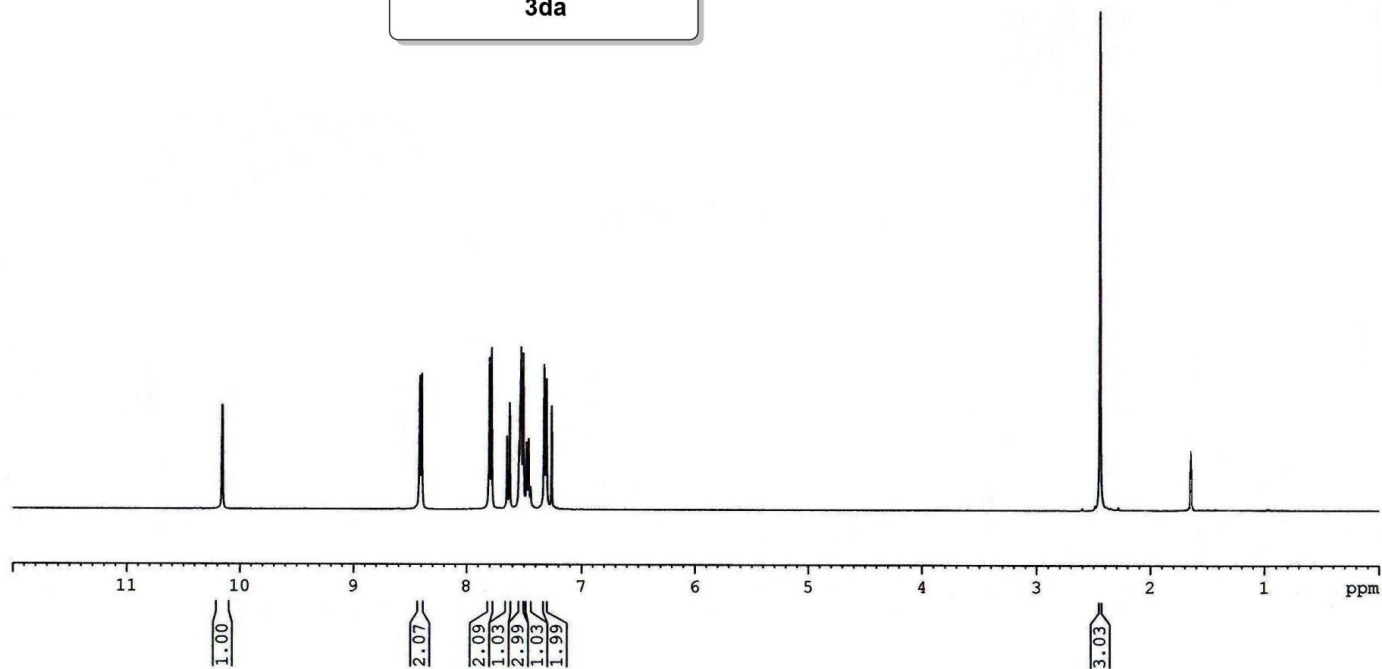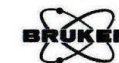

Current Data Parameters  
NAME Dr. A HAJRA 2015  
EXPNO 316  
PROCNO 1

F2 - Acquisition Parameters  
Date\_ 20150626  
Time 11.31  
INSTRUM spect  
PROBHD 5 mm PABBO BB/  
PULPROG zg30  
TD 32768  
SOLVENT CDC13  
NS 32  
DS 1  
SWH 8223.685 Hz  
FIDRES 0.250967 Hz  
AQ 1.9923444 sec  
RG 87.66  
DW 60.800 usec  
DE 6.50 usec  
TE 298.3 K  
D1 1.00000000 sec  
TD0 1

===== CHANNEL f1 =====  
NUC1 1H  
P1 14.75 usec  
PLW1 11.99499989 W  
SFO1 400.1524711 MHz

F2 - Processing parameters  
SI 16384  
SF 400.1500090 MHz  
WDW EM  
SSB 0  
LB 0.30 Hz  
GB 0  
PC 1.00

13C of VBAC-112-A

151.74  
150.36  
144.27  
140.58  
132.96  
132.32  
132.05  
130.06  
130.02  
129.54  
129.30  
128.65  
122.30  
118.13  
109.49

77.48  
77.16  
76.84

21.63

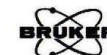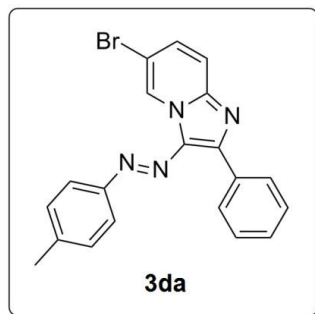

Current Data Parameters  
NAME Dr. A HAJRA 2015  
EXPNO 317  
PROCNO 1

F2 - Acquisition Parameters  
Date\_ 20150626  
Time 12.03  
INSTRUM spect  
PROBHD 5 mm PABBO BB/  
PULPROG zgpg30  
TD 32768  
SOLVENT CDCl3  
NS 640  
DS 2  
SWH 24038.461 Hz  
FIDRES 0.733596 Hz  
AQ 0.6816244 sec  
RG 87.66  
DW 20.800 usec  
DE 6.50 usec  
TE 299.1 K  
D1 2.0000000 sec  
D11 0.0300000 sec  
TD0 1

===== CHANNEL f1 =====  
NUC1 13C  
P1 8.90 usec  
PLW1 54.0000000 W  
SFO1 100.6278588 MHz

===== CHANNEL f2 =====  
CPDPRG2 waltz16  
NUC2 1H  
PCPD2 80.00 usec  
PLW2 12.0000000 W  
PLW12 0.40792999 W  
PLW13 0.26107001 W  
SFO2 400.1516006 MHz

F2 - Processing parameters  
SI 16384  
SF 100.6177837 MHz  
WDW EM  
SSB 0  
LB 1.00 Hz  
GB 0  
PC 1.40

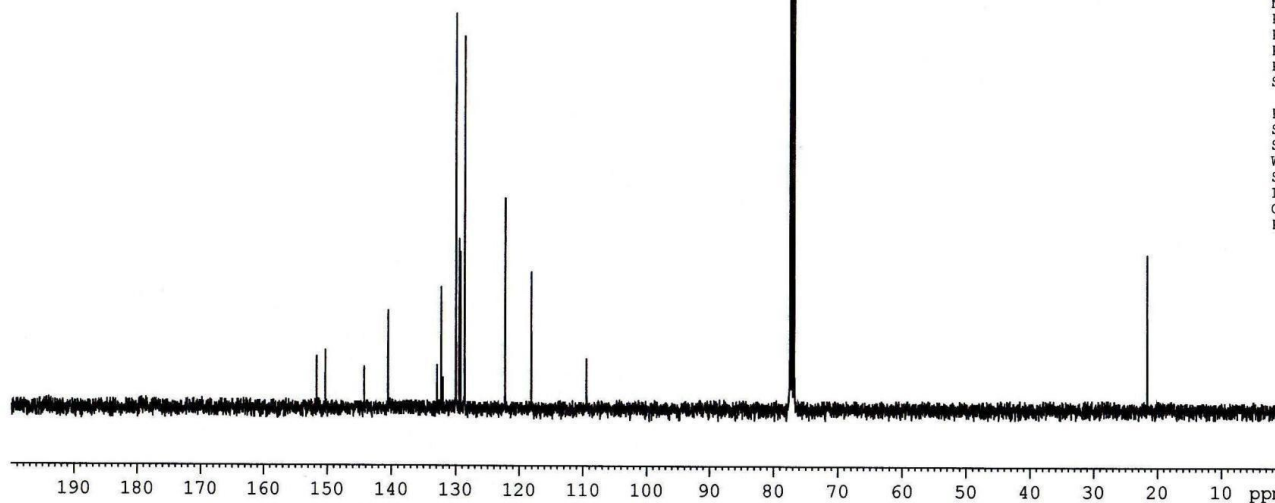

1H of VBAC-142

10.348

8.406  
8.390  
8.211  
8.190  
7.920  
7.899  
7.827  
7.805  
7.603  
7.581  
7.545  
7.528  
7.260

4.455  
4.437  
4.419  
4.401

1.459  
1.441  
1.423

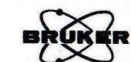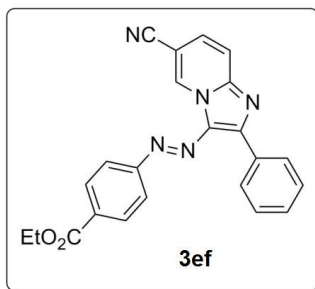

Current Data Parameters  
NAME Dr. A HAJRA 2015  
EXPNO 570  
PROCNO 1

F2 - Acquisition Parameters  
Date\_ 20150831  
Time 16.10  
INSTRUM spect  
PROBHD 5 mm PABBO BB/  
PULPROG zg30  
TD 32768  
SOLVENT CDCl3  
NS 24  
DS 1  
SWH 8223.685 Hz  
FIDRES 0.250967 Hz  
AQ 1.9923444 sec  
RG 106.66  
DW 60.800 usec  
DE 6.50 usec  
TE 297.7 K  
D1 1.00000000 sec  
TD0 1

===== CHANNEL f1 =====  
NUC1 1H  
P1 14.75 usec  
PLW1 11.99499989 W  
SFO1 400.1524711 MHz

F2 - Processing parameters  
SI 16384  
SF 400.1500090 MHz  
WDW EM  
SSB 0  
LB 0.30 Hz  
GB 0  
PC 1.00

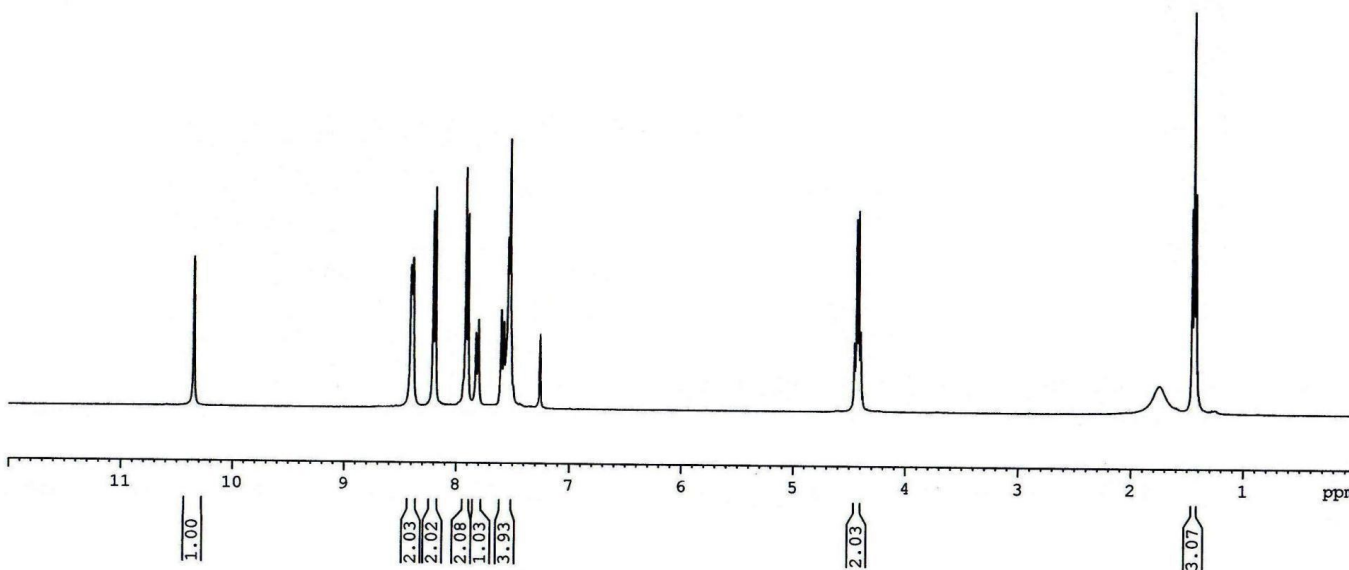



166.09  
 155.96  
 135.33  
 131.95  
 131.68  
 130.95  
 130.88  
 130.59  
 130.27  
 129.77  
 128.90  
 122.23  
 121.80  
 118.63  
 116.38  
 101.53  
 77.47  
 77.16  
 76.84  
 61.43

13C of VBAC-142

14.49

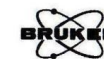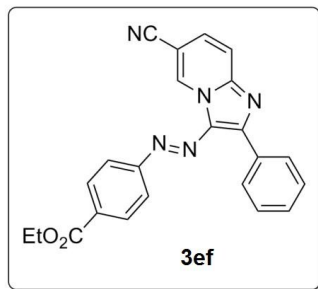

Current Data Parameters  
 NAME Dr. A HAJRA 2015  
 EXPNO 571  
 PROCNO 1

F2 - Acquisition Parameters  
 Date 20150831  
 Time 16.26  
 INSTRUM spect  
 PROBHD 5 mm PABBO BB/  
 PULPROG zgpg30  
 TD 32768  
 SOLVENT CDCl3  
 NS 320  
 DS 2  
 SWH 24038.461 Hz  
 FIDRES 0.733596 Hz  
 AQ 0.6816244 sec  
 RG 106.66  
 DW 20.800 usec  
 DE 6.50 usec  
 TE 298.7 K  
 D1 2.00000000 sec  
 D11 0.03000000 sec  
 TD0 1

===== CHANNEL f1 =====  
 NUC1 13C  
 P1 8.90 usec  
 PLW1 54.00000000 W  
 SFO1 100.6278588 MHz

===== CHANNEL f2 =====  
 CPDPRG2 waltz16  
 NUC2 1H  
 PCPD2 80.00 usec  
 PLW2 12.00000000 W  
 PLW12 0.40792999 W  
 PLW13 0.26107001 W  
 SFO2 400.1516006 MHz

F2 - Processing parameters  
 SI 16384  
 SF 100.6177851 MHz  
 WDW EM  
 SSB 0  
 LB 1.00 Hz  
 GB 0  
 PC 1.40

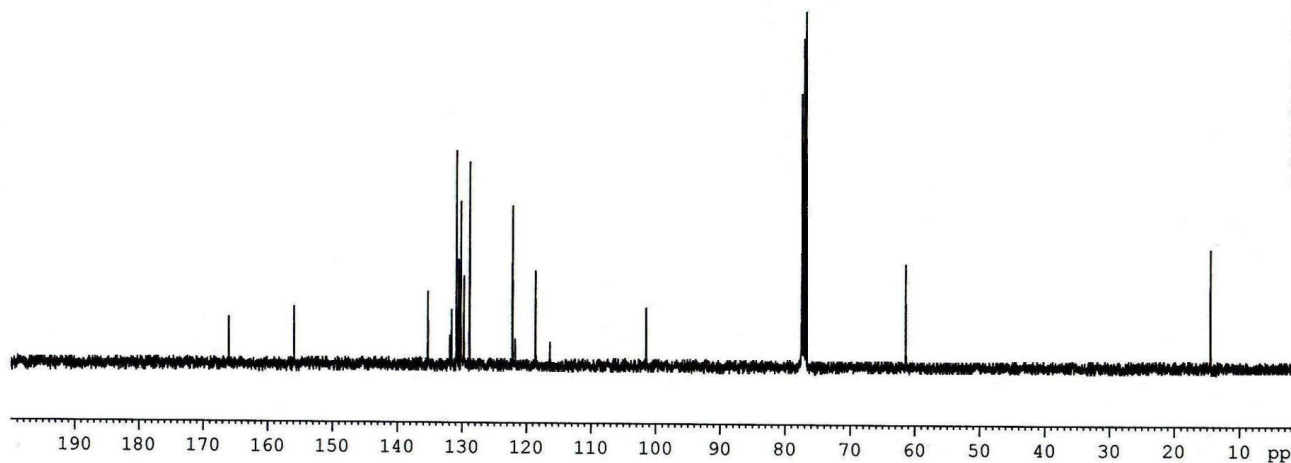

1H of VBAC-116

9.977  
9.968  
8.972  
8.614  
8.592  
8.000  
7.981  
7.960  
7.897  
7.889  
7.876  
7.822  
7.814  
7.808  
7.802  
7.772  
7.761  
7.548  
7.537  
7.526  
7.514  
7.504  
7.469  
7.453  
7.320  
7.301  
7.260  
7.029

2.437

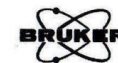

Current Data Parameters  
NAME Dr. A HAJRA 2015  
EXPNO 340  
PROCNO 1

F2 - Acquisition Parameters  
Date\_ 20150702  
Time 20.21  
INSTRUM spect  
PROBHD 5 mm PABBO BB/  
PULPROG zg30  
TD 32768  
SOLVENT CDC13  
NS 24  
DS 1  
SWH 8223.685 Hz  
FIDRES 0.250967 Hz  
AQ 1.9923444 sec  
RG 87.66  
DW 60.800 usec  
DE 6.50 usec  
TE 298.1 K  
D1 1.0000000 sec  
TDO 1

----- CHANNEL f1 -----  
NUC1 1H  
P1 14.75 usec  
PLW1 11.99499989 W  
SF01 400.1524711 MHz

F2 - Processing parameters  
SI 16384  
SF 400.1500090 MHz  
WDW EM  
SSB 0  
LB 0.30 Hz  
GB 0  
PC 1.00

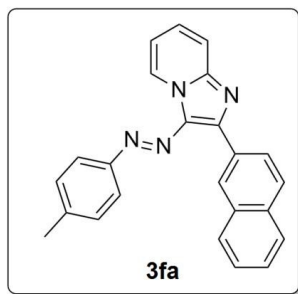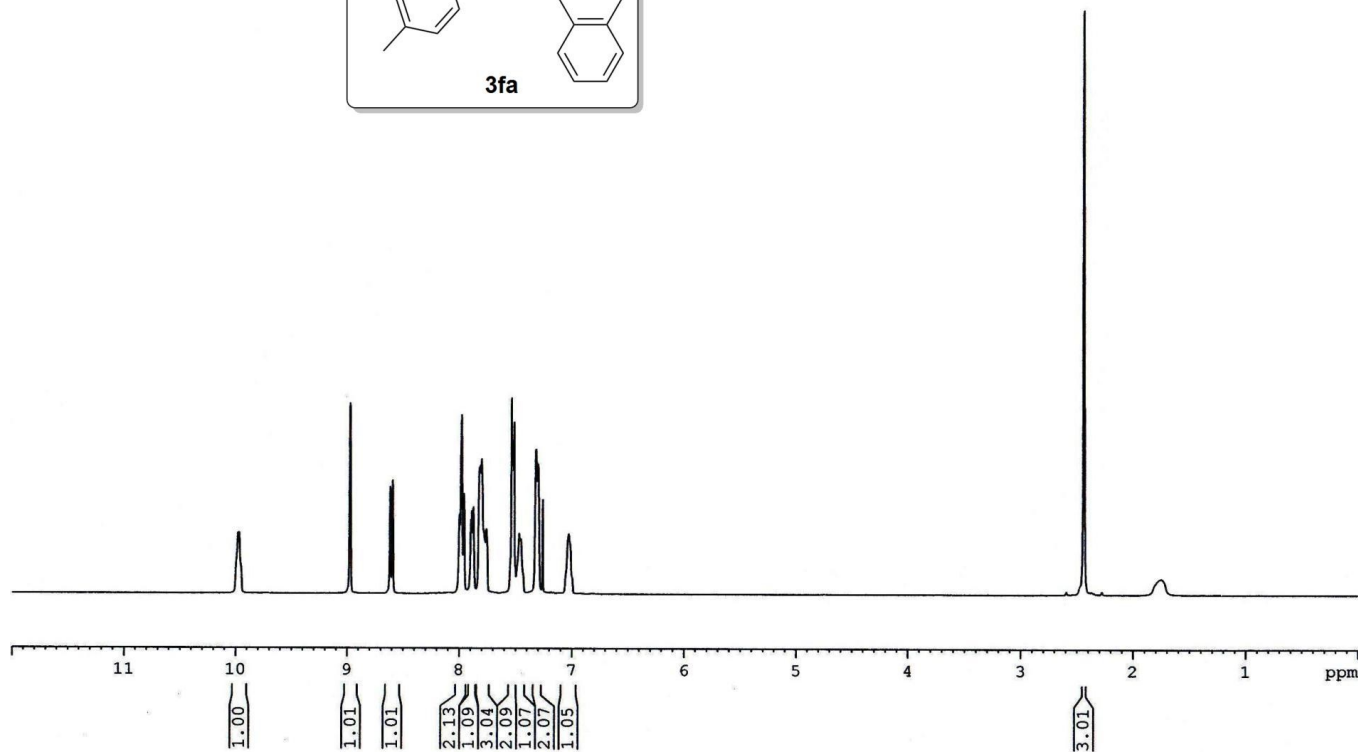



13C of VBAC-116

152.01  
150.07  
146.08  
139.96  
133.80  
133.52  
132.51  
130.78  
130.08  
130.01  
129.48  
129.36  
129.12  
127.99  
127.79  
127.10  
126.87  
126.28  
122.10  
117.51  
115.19

77.47  
77.16  
76.84

21.57

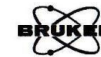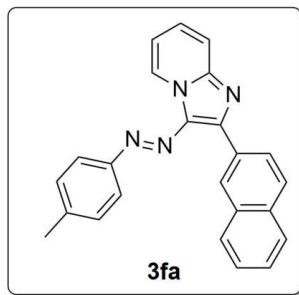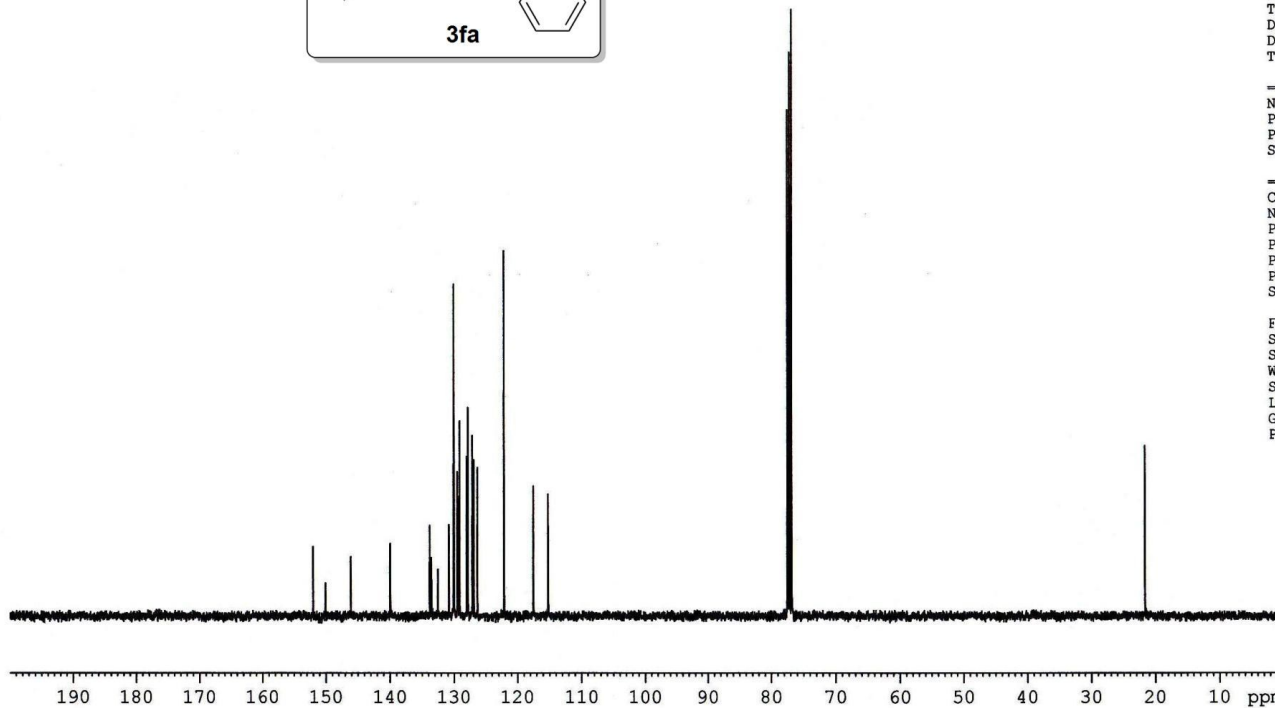

Current Data Parameters  
NAME Dr. A HAJRA 2015  
EXPNO 343  
PROCNO 1

F2 - Acquisition Parameters  
Date\_ 20150703  
Time 12.37  
INSTRUM spect  
PROBHD 5 mm PABBO BB/  
PULPROG zgpg30  
TD 32768  
SOLVENT CDCl3  
NS 400  
DS 2  
SWH 24038.461 Hz  
FIDRES 0.733596 Hz  
AQ 0.6816244 sec  
RG 87.66  
DW 20.800 usec  
DE 6.50 usec  
TE 298.1 K  
D1 2.00000000 sec  
D11 0.03000000 sec  
TD0 1

===== CHANNEL f1 =====  
NUC1 13C  
P1 8.90 usec  
PLW1 54.00000000 W  
SFO1 100.6278588 MHz

===== CHANNEL f2 =====  
CPDPRG2 waltz16  
NUC2 1H  
PCPD2 80.00 usec  
PLW2 12.00000000 W  
PLW12 0.40792999 W  
PLW13 0.26107001 W  
SFO2 400.1516006 MHz

F2 - Processing parameters  
SI 16384  
SF 100.6177865 MHz  
WDW EM  
SSB 0  
LB 1.00 Hz  
GB 0  
PC 1.40

— 13.085

1H of VBAC-117

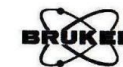

Current Data Parameters  
NAME Dr. A HAJRA 2015  
EXPNO 341  
PROCNO 1

F2 - Acquisition Parameters  
Date\_ 20150702  
Time 20.27  
INSTRUM spect  
PROBHD 5 mm PABBO BB/  
PULPROG zg30  
TD 32768  
SOLVENT CDCl3  
NS 24  
DS 1  
SWH 8223.685 Hz  
FIDRES 0.250967 Hz  
AQ 1.9923444 sec  
RG 40.87  
DW 60.800 usec  
DE 6.50 usec  
TE 298.1 K  
D1 1.00000000 sec  
TDO 1

===== CHANNEL f1 =====  
NUC1 1H  
P1 14.75 usec  
PLW1 11.99499989 W  
SFO1 400.1524711 MHz

F2 - Processing parameters  
SI 16384  
SF 400.1500000 MHz  
WDW EM  
SSB 0  
LB 0.30 Hz  
GB 0  
PC 1.00

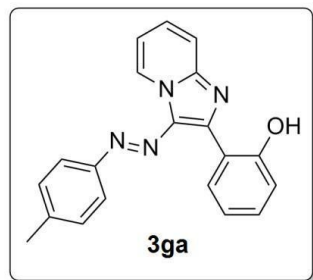

10.016  
10.000  
8.750  
8.731  
7.884  
7.868  
7.765  
7.745  
7.674  
7.652  
7.514  
7.496  
7.476  
7.378  
7.359  
7.340  
7.321  
7.301  
7.284  
7.100  
7.081  
7.068  
7.050  
7.030  
7.012  
6.994

— 2.453

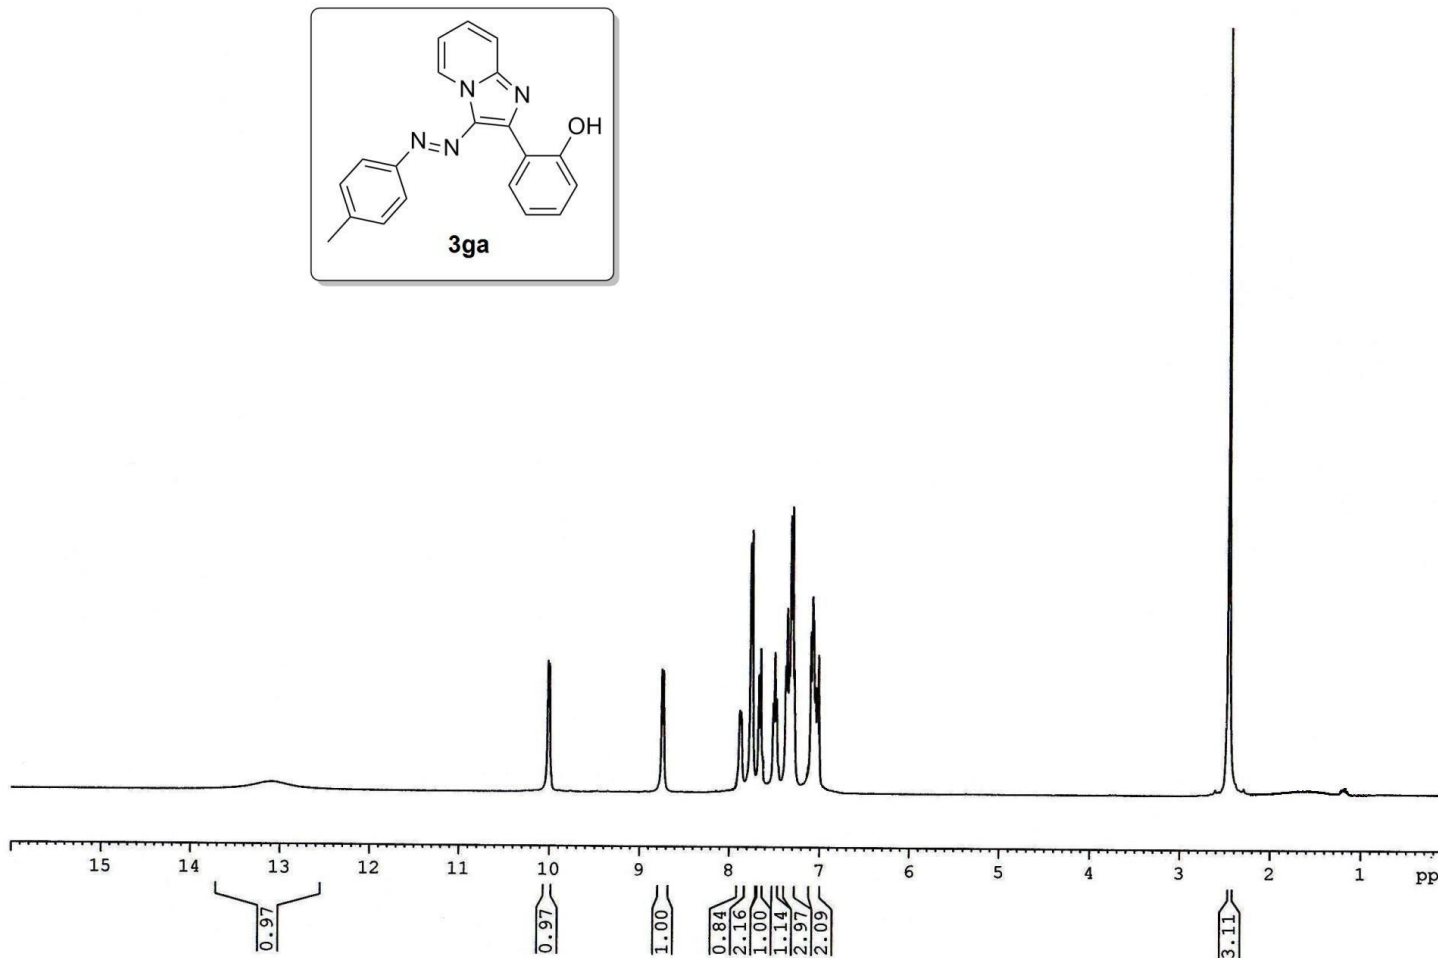

13C of VBAC-117

159.59  
151.76  
143.58  
140.17  
131.29  
131.22  
130.02  
129.92  
129.46  
122.77  
122.58  
122.12  
119.40  
117.83  
116.50  
116.35  
115.77

77.48  
77.16  
76.84

21.59

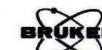

Current Data Parameters  
NAME Dr. A HAJRA 2015  
EXPNO 342  
PROCNO 1

F2 - Acquisition Parameters  
Date\_ 20150702  
Time 20.49  
INSTRUM spect  
PROBHD 5 mm PABBO BB/  
PULPROG zgpg30  
TD 32768  
SOLVENT CDC13  
NS 400  
DS 2  
SWH 24038.461 Hz  
FIDRES 0.733596 Hz  
AQ 0.6816244 sec  
RG 87.66  
DW 20.800 usec  
DE 6.50 usec  
TE 299.2 K  
D1 2.00000000 sec  
D11 0.03000000 sec  
TDO 1

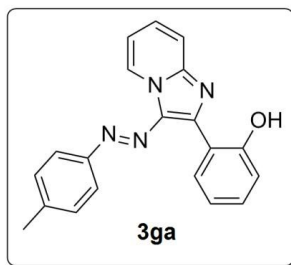

===== CHANNEL f1 =====  
NUC1 13C  
P1 8.90 usec  
PLW1 54.00000000 W  
SFO1 100.6278588 MHz

===== CHANNEL f2 =====  
CPDPRG2 waltz16  
NUC2 1H  
PCPD2 80.00 usec  
PLW2 12.00000000 W  
PLW12 0.40792999 W  
PLW13 0.26107001 W  
SFO2 400.1516006 MHz

F2 - Processing parameters  
SI 16384  
SF 100.6177852 MHz  
WDW EM  
SSB 0  
LB 1.00 Hz  
GB 0  
PC 1.40

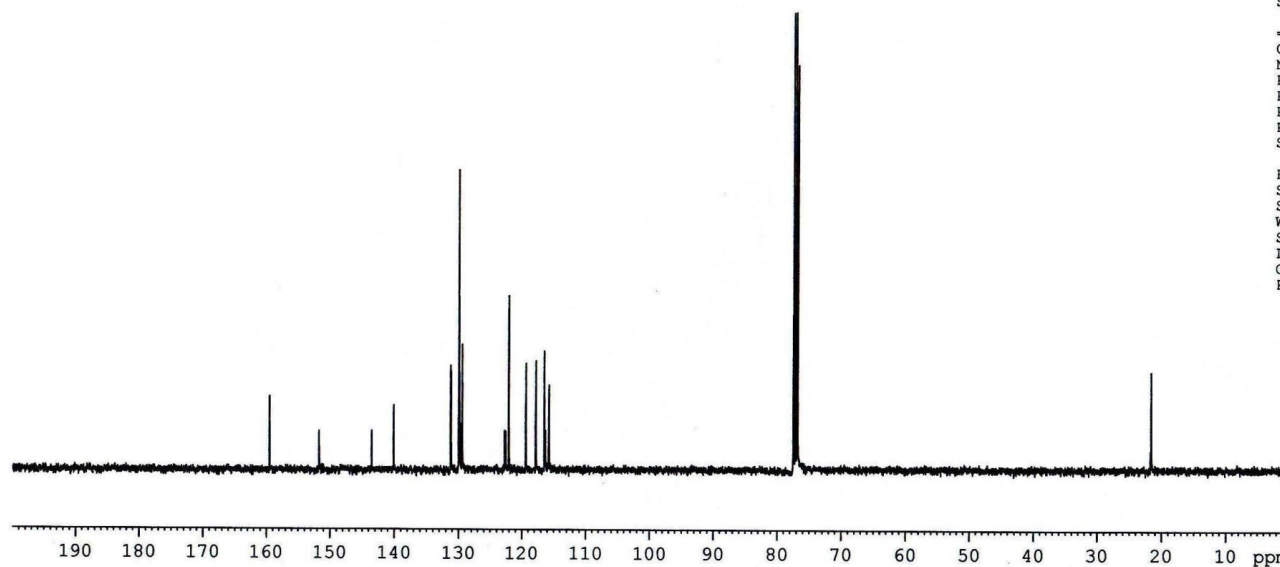

1H of VBAC119

9.873  
9.856  
8.129  
8.127  
8.120  
8.117  
7.837  
7.817  
7.704  
7.681  
7.549  
7.547  
7.535  
7.535  
7.463  
7.460  
7.445  
7.442  
7.437  
7.423  
7.420  
7.317  
7.296  
7.260  
7.218  
7.209  
7.206  
7.196  
7.1025  
7.1023  
7.008  
7.005  
6.990  
6.988

2.434

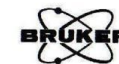

Current Data Parameters  
NAME Dr. A HAJRA 2015  
EXPNO 373  
PROCNO 1

F2 - Acquisition Parameters  
Date\_ 20150715  
Time\_ 18.00  
INSTRUM spect  
PROBHD 5 mm PABBO BB/  
PULPROG zg30  
TD 32768  
SOLVENT CDCl3  
NS 32  
DS 1  
SWH 8223.685 Hz  
FIDRES 0.250967 Hz  
AQ 1.9923444 sec  
RG 106.66  
DW 60.800 usec  
DE 6.50 usec  
TE 297.7 K  
D1 1.00000000 sec  
TD0 1

===== CHANNEL f1 =====  
NUC1 1H  
P1 14.75 usec  
PLW1 11.99499989 W  
SFO1 400.1524711 MHz

F2 - Processing parameters  
SI 16384  
SF 400.1500090 MHz  
WDW EM  
SSB 0  
LB 0.30 Hz  
GB 0  
PC 1.00

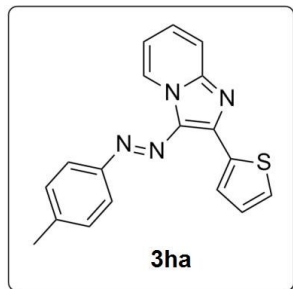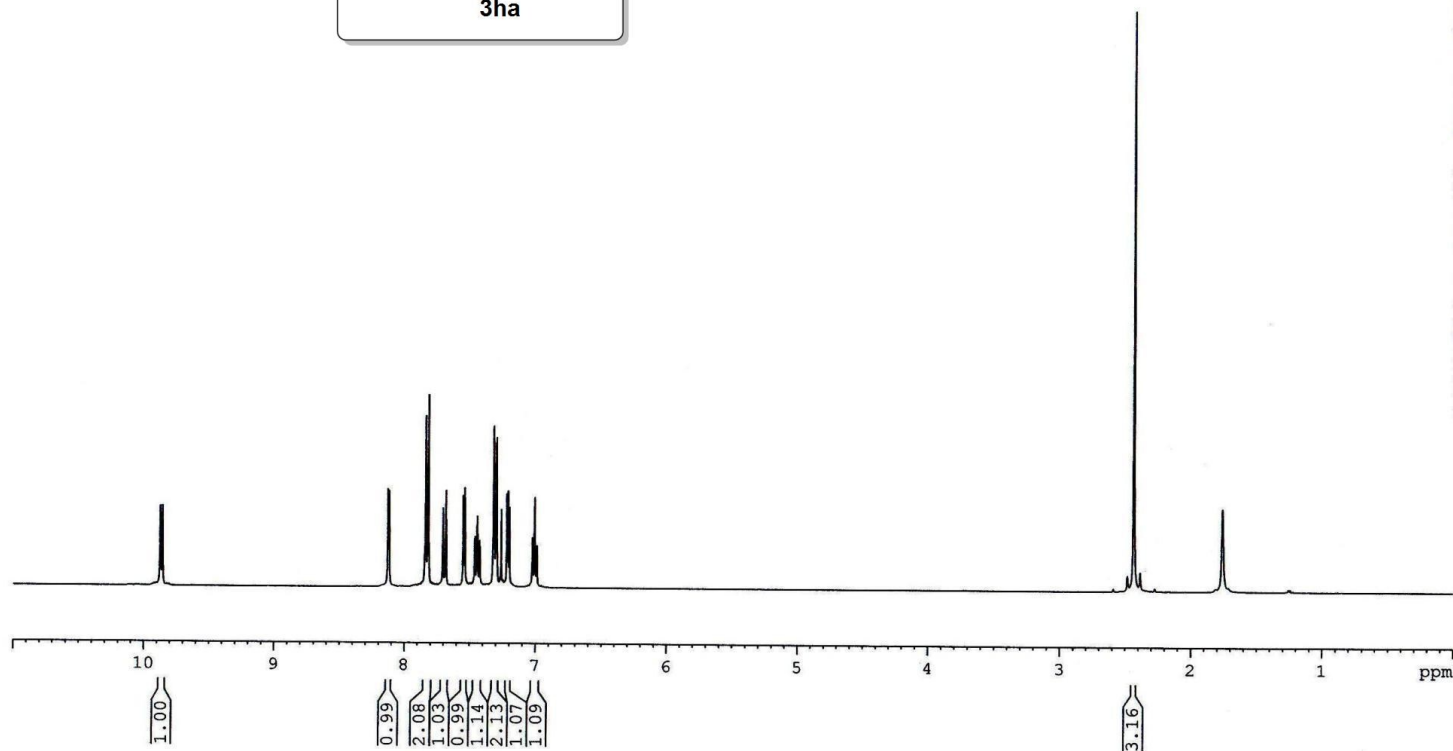

13C of VBAC-119

152.03  
146.37  
146.09  
139.96  
135.72  
130.88  
129.99  
129.77  
129.61  
129.21  
128.07  
122.32  
117.26  
115.04

77.48  
77.16  
76.84

21.59

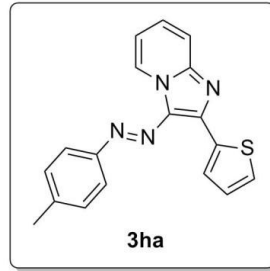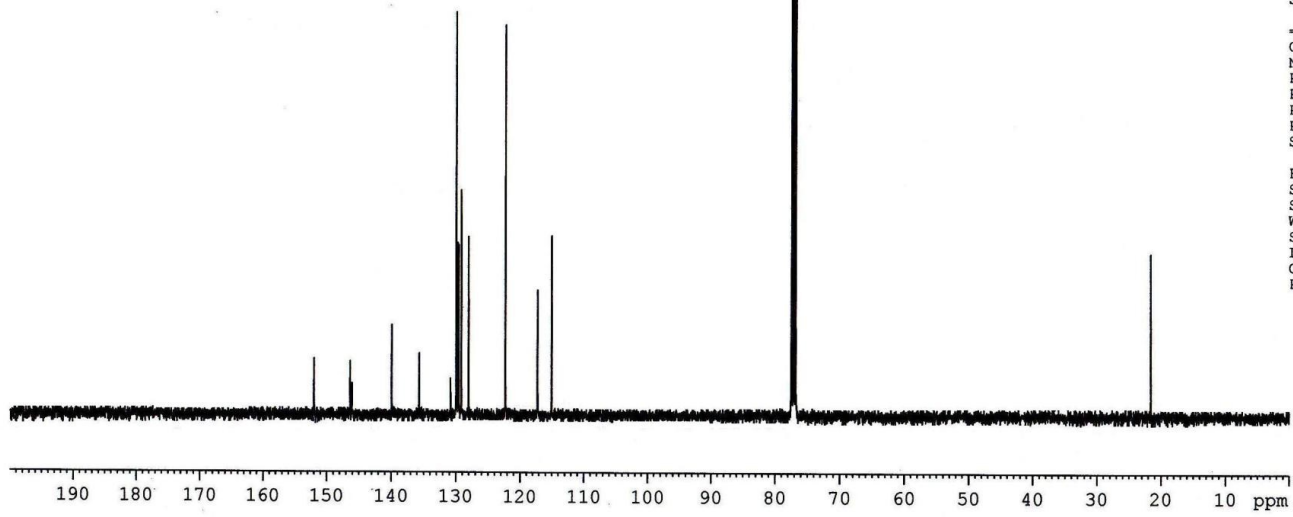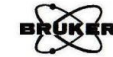

Current Data Parameters  
NAME Dr. A HAJRA 2015  
EXPNO 374  
PROCNO 1

F2 - Acquisition Parameters  
Date\_ 20150715  
Time\_ 18.22  
INSTRUM spect  
PROBHD 5 mm PABBO BB  
FULPROG zgpg30  
TD 32768  
SOLVENT CDC13  
NS 320  
DS 2  
SWH 24038.461 Hz  
FIDRES 0.733596 Hz  
AQ 0.6816244 sec  
RG 47.25  
DW 20.800 usec  
DE 6.50 usec  
TE 298.8 K  
D1 2.00000000 sec  
D11 0.03000000 sec  
TD0 1

----- CHANNEL f1 -----  
NUC1 13C  
P1 8.90 usec  
PLW1 54.00000000 W  
SFO1 100.6278588 MHz

----- CHANNEL f2 -----  
CPDPRG2 waltz16  
NUC2 1H  
PCPD2 80.00 usec  
PLW2 12.00000000 W  
PLW12 0.40792999 W  
PLW13 0.26107001 W  
SFO2 400.1516006 MHz

F2 - Processing parameters  
SI 16384  
SF 100.6177851 MHz  
WDW EM  
SSB 0  
LB 1.00 Hz  
GB 0  
PC 1.40



13C of VBAC-126

151.80  
149.58  
149.35  
146.73  
146.44  
133.16  
132.88  
130.14  
129.51  
128.56  
127.67  
127.35  
126.14  
124.12  
115.74

77.48  
77.16  
76.84

—16.84

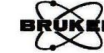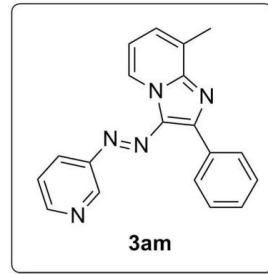

Current Data Parameters  
NAME Dr. A HAJRA 2015  
EXPNO 407  
PROCNO 1

F2 - Acquisition Parameters  
Date\_ 20150720  
Time 17.44  
INSTRUM spect  
PROBHD 5 mm PABBO BB/  
PULPROG zgpg30  
TD 32768  
SOLVENT CDCl3  
NS 256  
DS 2  
SWH 24038.461 Hz  
FIDRES 0.733596 Hz  
AQ 0.6816244 sec  
RG 67.81  
DW 20.800 usec  
DE 6.50 usec  
TE 298.3 K  
D1 2.00000000 sec  
D11 0.03000000 sec  
TD0 1

===== CHANNEL f1 =====  
NUC1 13C  
P1 8.90 usec  
PLW1 54.00000000 W  
SFO1 100.6278588 MHz

===== CHANNEL f2 =====  
CPDPRG2 waltz16  
NUC2 1H  
PCPD2 80.00 usec  
PLW2 12.00000000 W  
PLW12 0.40792999 W  
PLW13 0.26107001 W  
SFO2 400.1516006 MHz

F2 - Processing parameters  
SI 16384  
SF 100.6177880 MHz  
WDW EM  
SSB 0  
LB 1.00 Hz  
GB 0  
PC 1.40

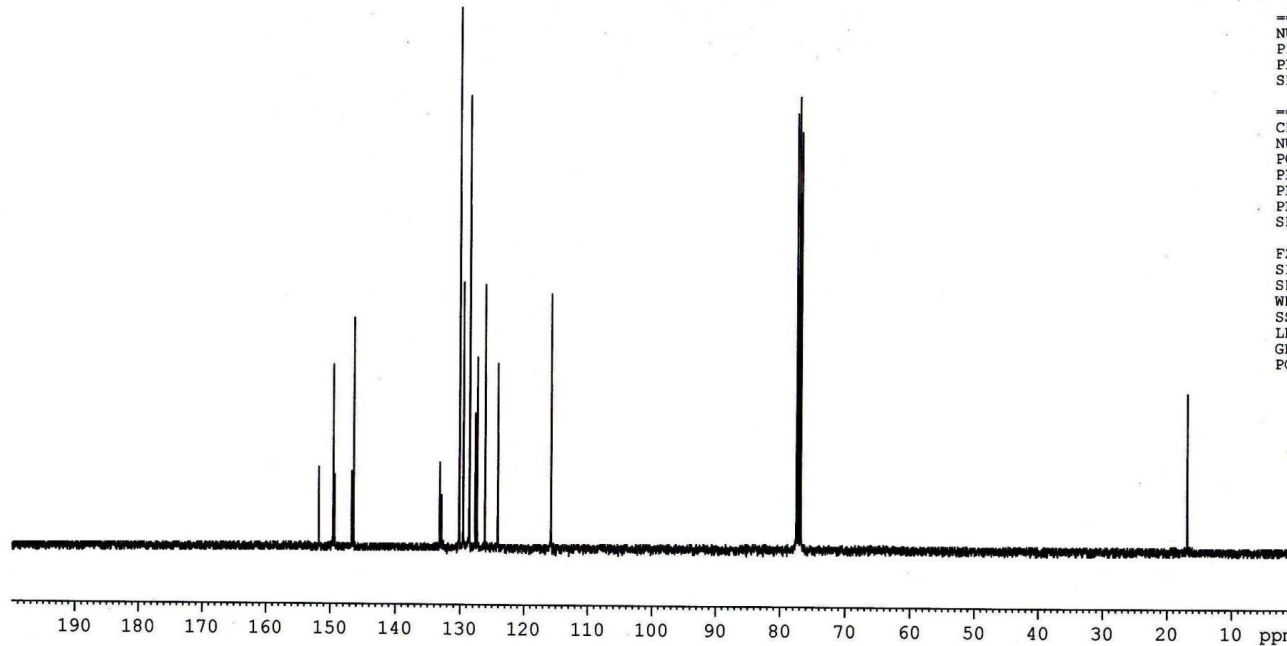



AC.P1.1-1H(SKD)

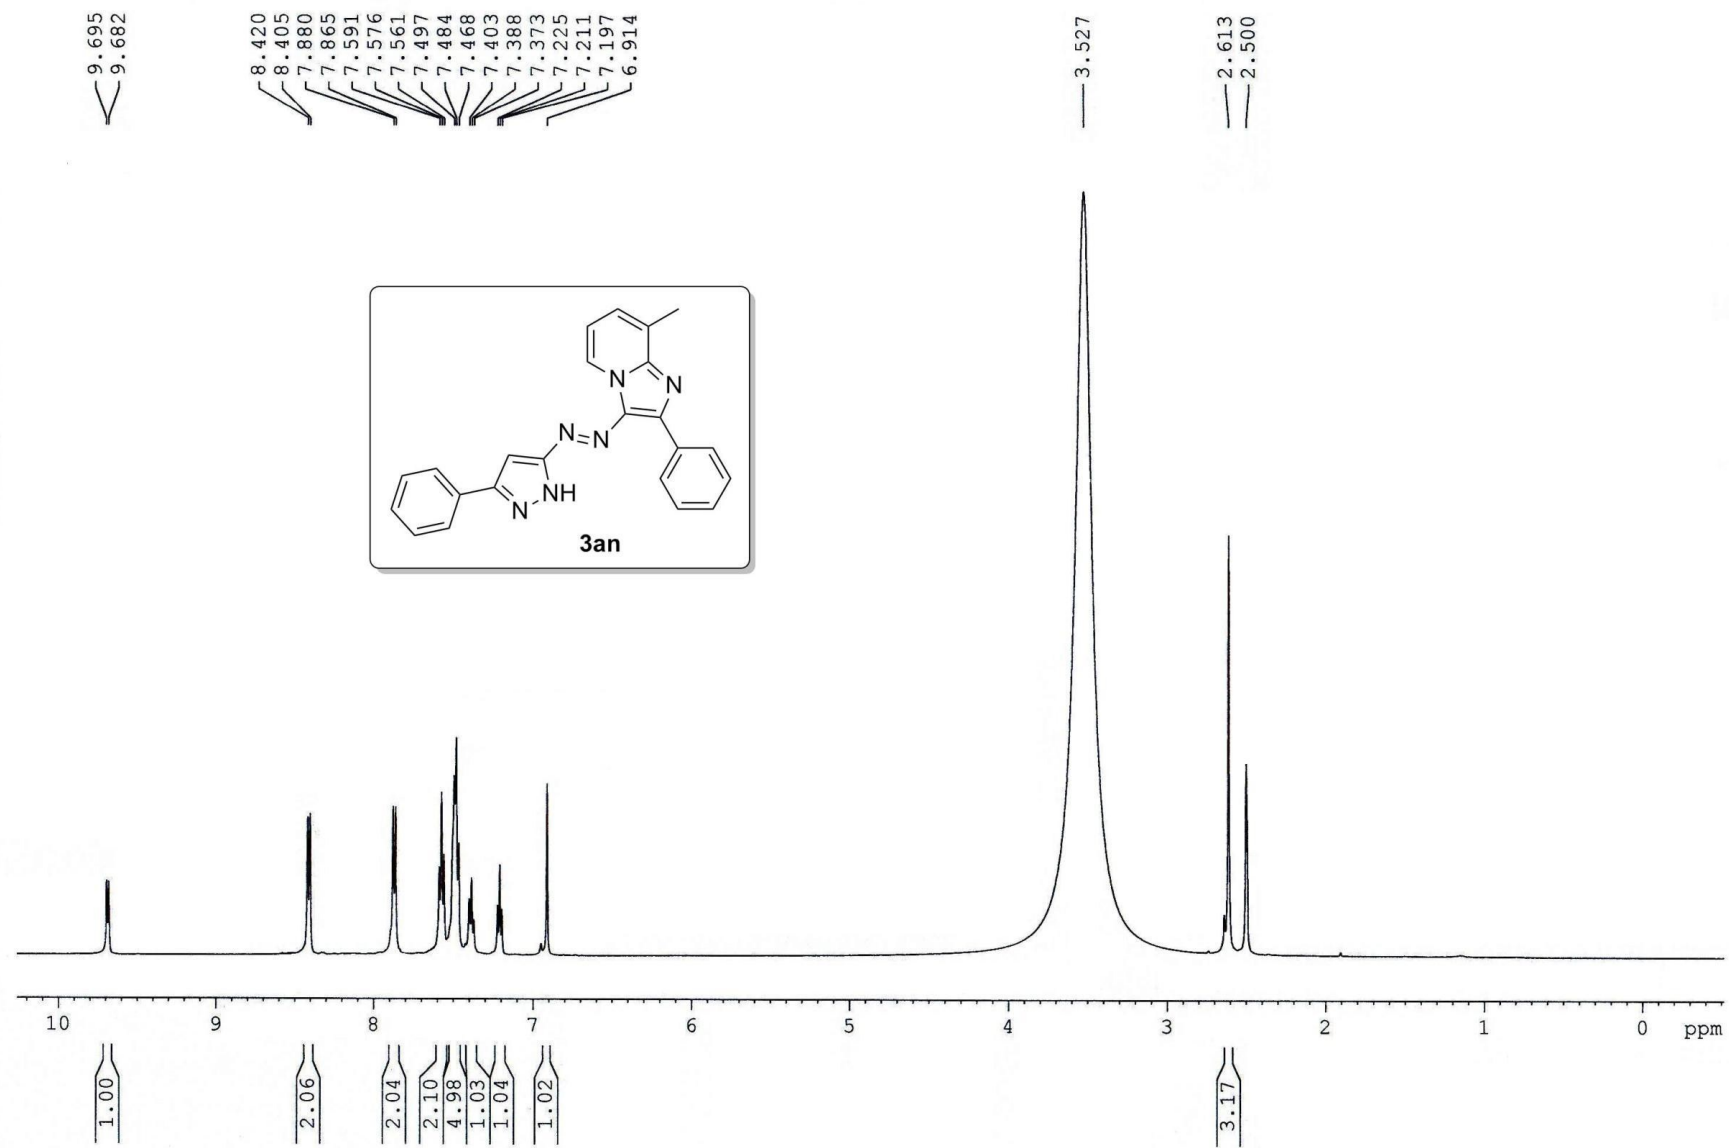

AC.P1.1-13C (SKD)

148.53  
145.68  
132.71  
132.09  
129.72  
129.56  
129.39  
129.06  
128.89  
128.73  
128.54  
126.89  
125.44  
116.24

90.79

40.01  
39.93  
39.84  
39.76  
39.67  
39.50  
39.34  
39.17  
39.01

16.30

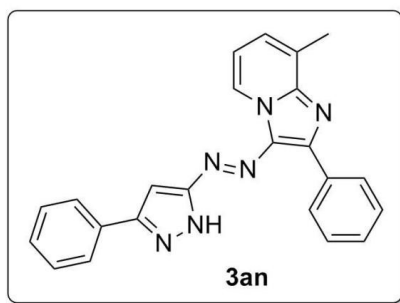

```

NAME      AC.P1.1-13C
EXPNO     1
PROCNO    1
Date_     20150824
Time      10.05
INSTRUM   spect
PROBHD    5 mm PABBO BB-
PULPROG   zgpg30
TD         32768
SOLVENT   DMSO
NS         1546
DS         4
SWH        29761.904 Hz
FIDRES     0.908261 Hz
AQ         0.5505524 sec
RG         32
DW         16.800 usec
DE         6.50 usec
TE         300.6 K
D1         2.0000000 sec
D11        0.0300000 sec
TD0        1
    
```

```

===== CHANNEL f1 =====
NUC1      13C
P1         9.88 usec
PL1        0.50 dB
PL1W      82.16106415 W
SFO1      125.7703643 MHz
    
```

```

===== CHANNEL f2 =====
CPDPRG2   waltz16
NUC2       1H
PCPD2     80.00 usec
PL2        1.00 dB
PL12       16.50 dB
PL13       20.00 dB
PL2W      15.50318813 W
PL12W     0.43693921 W
PL13W     0.19517358 W
SFO2      500.1320005 MHz
SI         16384
SF        125.7578356 MHz
WDW        EM
SSB         0
LB          1.00 Hz
GB          0
PC          1.40
    
```

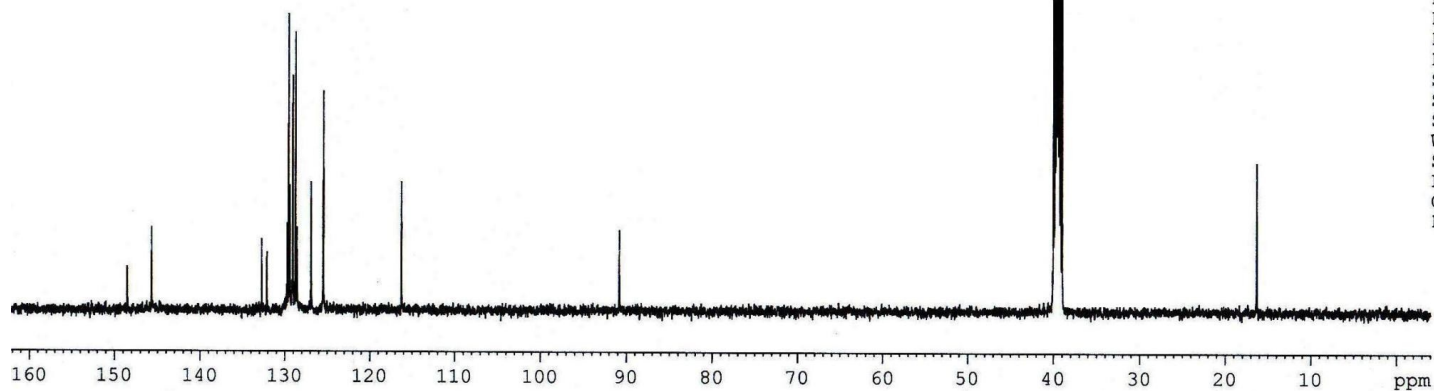

1H of VBAC-123

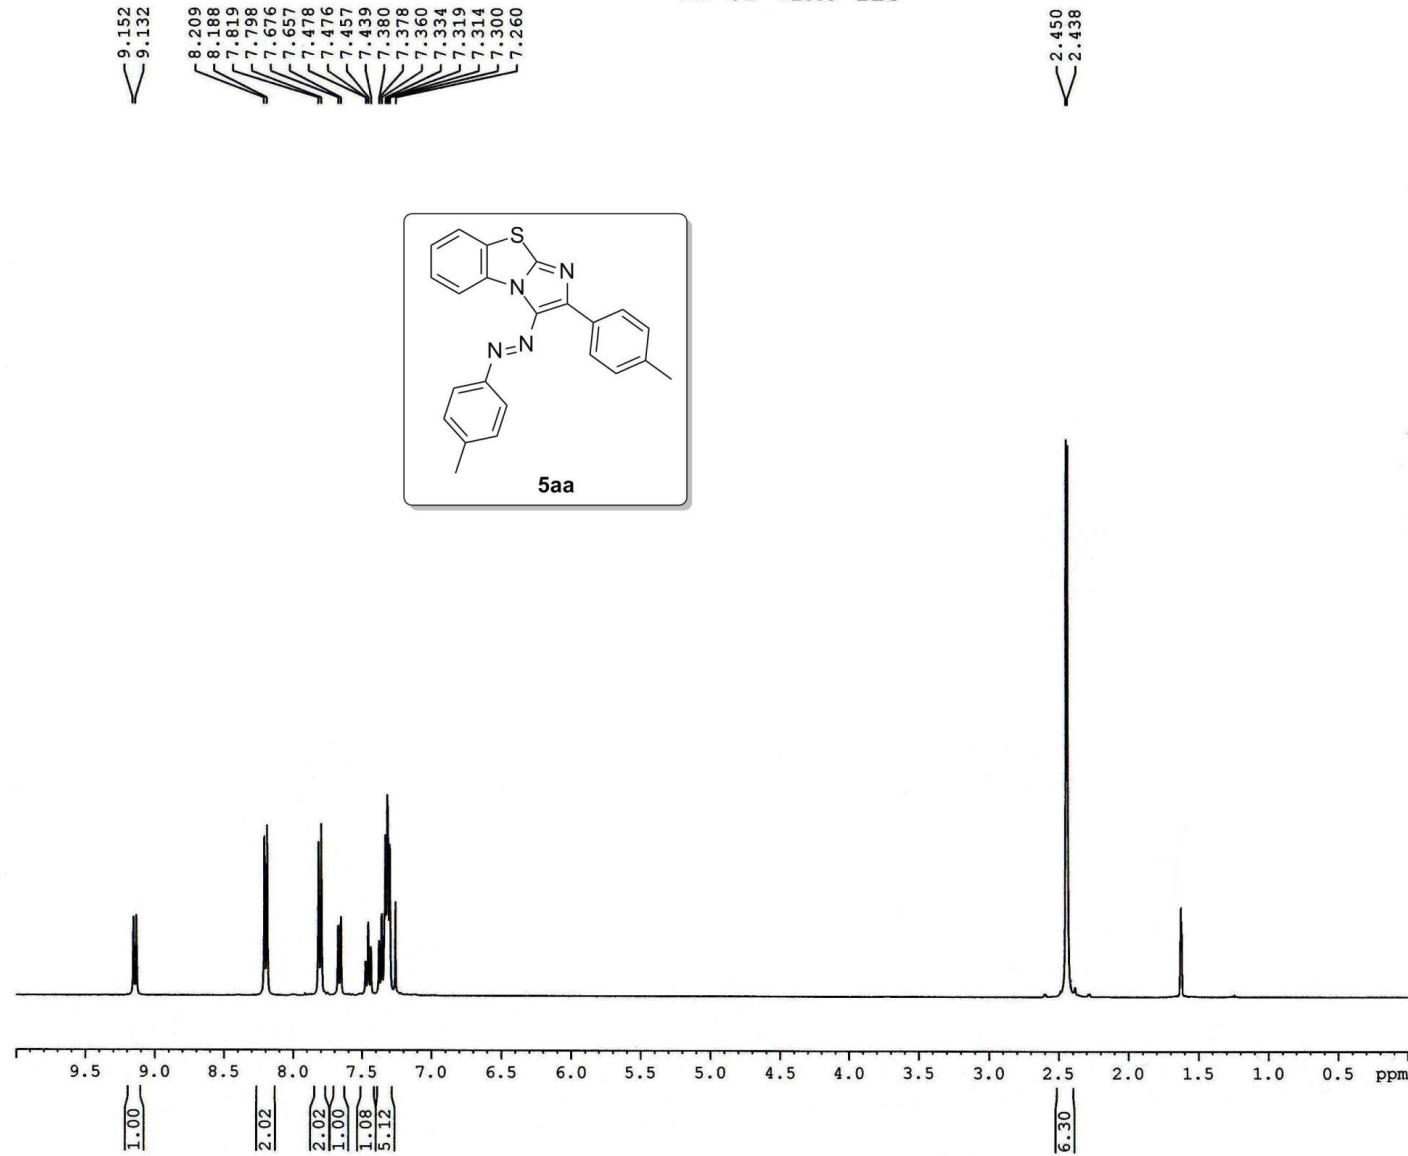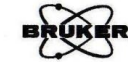

Current Data Parameters  
 NAME Dr. A HAJRA 2015  
 EXPNO 382  
 PROCNO 1

F2 - Acquisition Parameters  
 Date\_ 20150716  
 Time\_ 15.24  
 INSTRUM spect  
 PROBHD 5 mm PABBO BB/  
 PULPROG zg30  
 TD 32768  
 SOLVENT CDC13  
 NS 32  
 DS 1  
 SWH 8223.685 Hz  
 FIDRES 0.250967 Hz  
 AQ 1.9923444 sec  
 RG 120.16  
 DW 60.800 usec  
 DE 6.50 usec  
 TE 297.9 K  
 D1 1.0000000 sec  
 TD0 1

----- CHANNEL f1 -----  
 NUC1 1H  
 P1 14.75 usec  
 PLW1 11.99499989 W  
 SFO1 400.1524711 MHz

F2 - Processing parameters  
 SI 16384  
 SF 400.1500090 MHz  
 WDW EM  
 SSB 0  
 LB 0.30 Hz  
 GB 0  
 PC 1.00

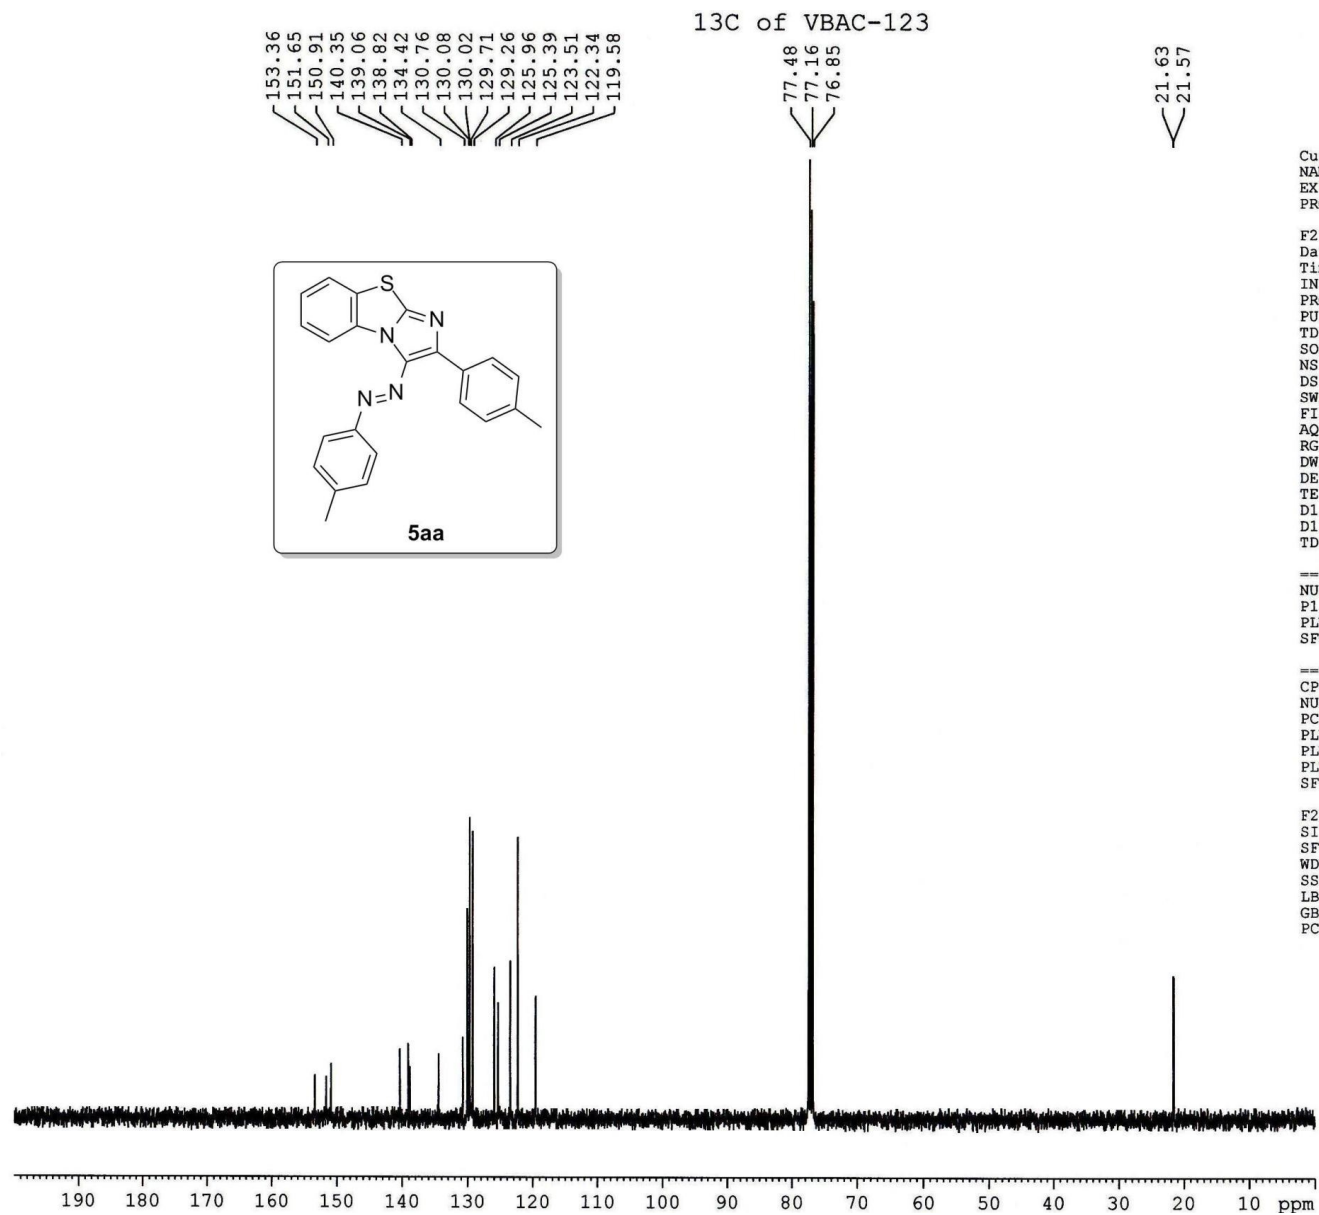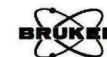

Current Data Parameters  
 NAME Dr. A HAJRA 2015  
 EXPNO 383  
 PROCNO 1

F2 - Acquisition Parameters  
 Date\_ 20150716  
 Time 15.46  
 INSTRUM spect  
 PROBHD 5 mm PABBO BB/  
 PULPROG zgpg30  
 TD 32768  
 SOLVENT CDCl3  
 NS 320  
 DS 2  
 SWH 24038.461 Hz  
 FIDRES 0.733596 Hz  
 AQ 0.6816244 sec  
 RG 87.66  
 DW 20.800 usec  
 DE 6.50 usec  
 TE 298.9 K  
 D1 2.0000000 sec  
 D11 0.0300000 sec  
 TD0 1

===== CHANNEL f1 =====  
 NUC1 13C  
 P1 8.90 usec  
 PLW1 54.0000000 W  
 SFO1 100.6278588 MHz

===== CHANNEL f2 =====  
 CPDPRG2 waltz16  
 NUC2 1H  
 PCPD2 80.00 usec  
 PLW2 12.0000000 W  
 PLW12 0.40792999 W  
 PLW13 0.26107001 W  
 SFO2 400.1516006 MHz

F2 - Processing parameters  
 SI 16384  
 SF 100.6177839 MHz  
 WDW EM  
 SSB 0  
 LB 1.00 Hz  
 GB 0  
 PC 1.40

1H of VBAC-134

9.520  
9.498  
8.279  
8.260  
7.997  
7.885  
7.864  
7.729  
7.709  
7.513  
7.494  
7.475  
7.466  
7.443  
7.424  
7.405  
7.260

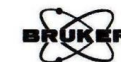

Current Data Parameters  
NAME Dr. A HAJRA 2015  
EXPNO 528  
PROCNO 1

F2 - Acquisition Parameters  
Date 20150812  
Time 11.07  
INSTRUM spect  
PROBHD 5 mm PABBO BB/  
PULPROG zg30  
TD 32768  
SOLVENT CDCl3  
NS 32  
DS 1  
SWH 8223.685 Hz  
FIDRES 0.250967 Hz  
AQ 1.9923444 sec  
RG 135.7  
DW 60.800 usec  
DE 6.50 usec  
TE 296.8 K  
D1 1.0000000 sec  
TDO 1

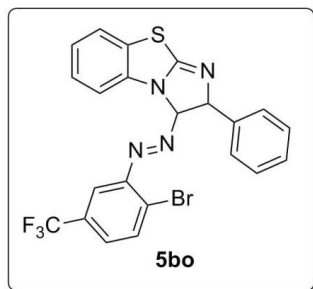

===== CHANNEL f1 =====  
NUC1 1H  
P1 14.75 usec  
PLW1 11.99499989 W  
SFO1 400.1524711 MHz

F2 - Processing parameters  
SI 16384  
SF 400.1500090 MHz  
WDW EM  
SSB 0  
LB 0.30 Hz  
GB 0  
PC 1.00

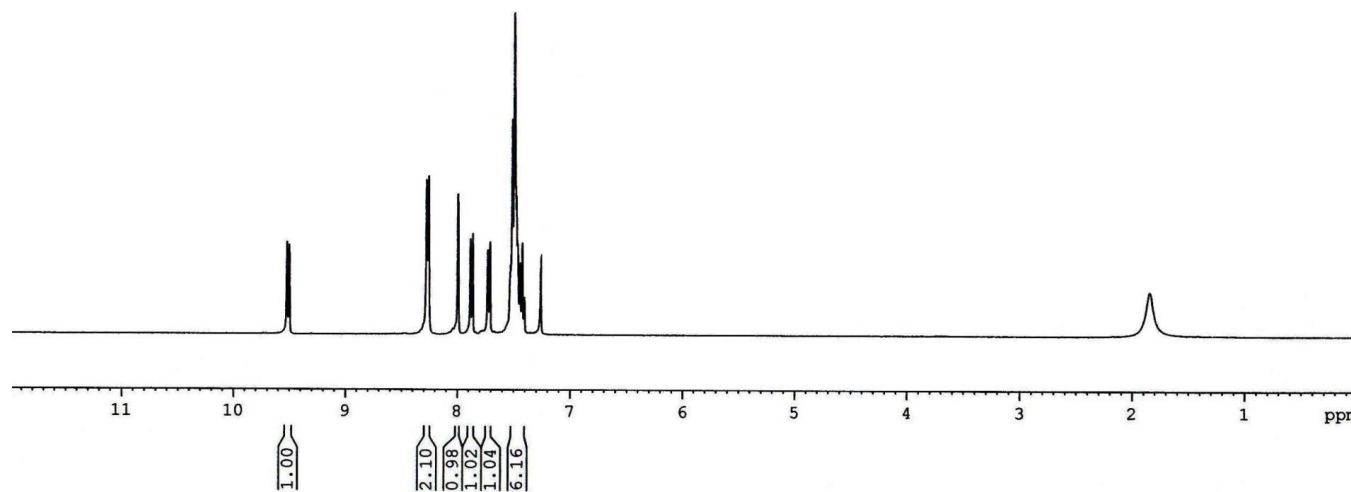

SG-CF3-13C (SR)

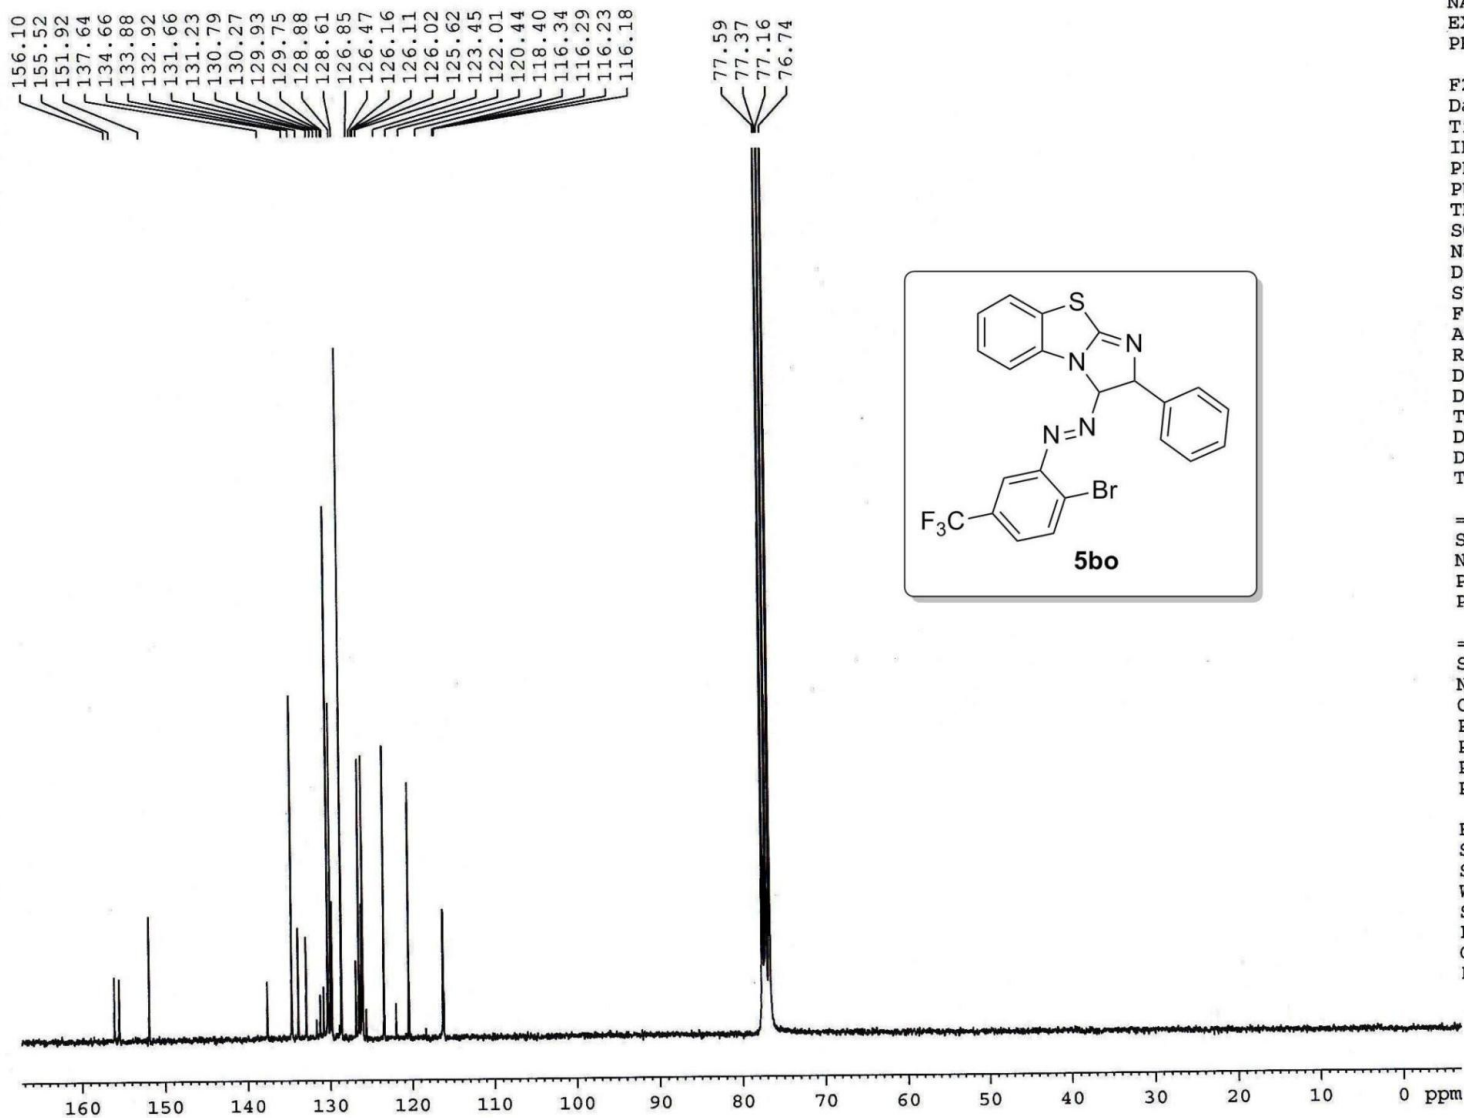

Current Data Parameters  
 NAME SG-CF3-13C  
 EXPNO 1  
 PROCNO 1

F2 - Acquisition Parameters  
 Date\_ 20151001  
 Time 20.12  
 INSTRUM spect  
 PROBHD 5 mm PABBO BB-  
 PULPROG zgpg30  
 TD 32768  
 SOLVENT CDCl3  
 NS 90000  
 DS 2  
 SWH 21929.824 Hz  
 FIDRES 0.669245 Hz  
 AQ 0.7471104 sec  
 RG 210.78  
 DW 22.800 usec  
 DE 6.50 usec  
 TE 303.8 K  
 D1 2.00000000 sec  
 D11 0.03000000 sec  
 TD0 1

==== CHANNEL f1 =====  
 SFO1 75.4752949 MHz  
 NUC1 13C  
 P1 9.25 usec  
 PLW1 34.00000000 W

==== CHANNEL f2 =====  
 SFO2 300.1312005 MHz  
 NUC2 1H  
 CPDPRG[2] waltz16  
 PCPD2 90.00 usec  
 PLW2 6.99840021 W  
 PLW12 0.17545000 W  
 PLW13 0.14211001 W

F2 - Processing parameters  
 SI 16384  
 SF 75.4677365 MHz  
 WDW EM  
 SSB 0  
 LB 1.00 Hz  
 GB 0  
 PC 1.40

1H of VBAC-122

8.508  
8.499  
8.384  
8.365  
7.753  
7.734  
7.515  
7.497  
7.478  
7.429  
7.411  
7.393  
7.273  
7.260  
6.889  
6.880

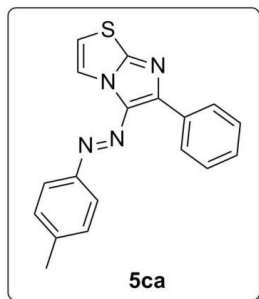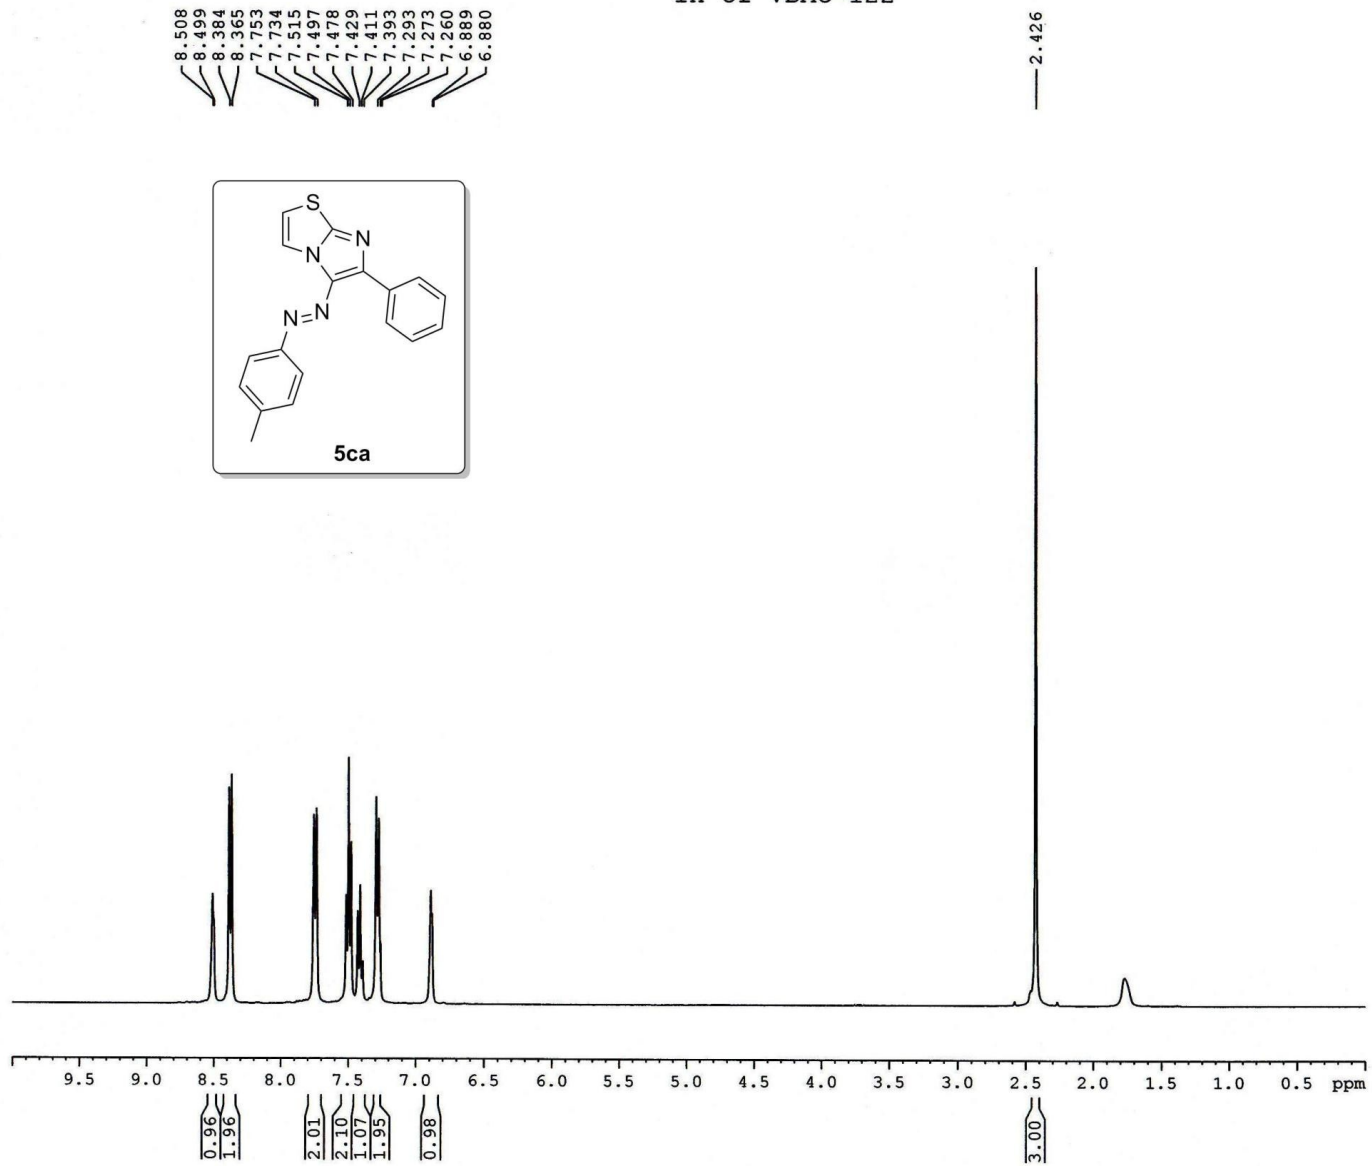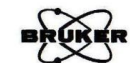

Current Data Parameters  
NAME Dr. A HAJRA 2015  
EXPNO 387  
PROCNO 1

F2 - Acquisition Parameters  
Date 20150718  
Time 12.33  
INSTRUM spect  
PROBHD 5 mm PABBO BB/  
PULPROG zg30  
TD 32768  
SOLVENT CDCl3  
NS 32  
DS 1  
SWH 8223.685 Hz  
FIDRES 0.250967 Hz  
AQ 1.9923444 sec  
RG 77.59  
DW 60.800 usec  
DE 6.50 usec  
TE 295.5 K  
D1 1.00000000 sec  
TD0 1

===== CHANNEL f1 =====  
NUC1 1H  
P1 14.75 usec  
PLW1 11.99499989 W  
SFO1 400.1524711 MHz

F2 - Processing parameters  
SI 16384  
SF 400.1500094 MHz  
WDW EM  
SSB 0  
LB 0.30 Hz  
GB 0  
PC 1.00



13C of VBAC-122

154.16  
151.46  
149.60  
140.27  
136.05  
133.44  
129.93  
129.02  
128.87  
128.60  
123.22  
122.32  
113.13

77.48  
77.16  
76.84

21.59

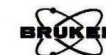

Current Data Parameters  
NAME Dr. A HAJRA 2015  
EXPNO 388  
PROCNO 1

F2 - Acquisition Parameters  
Date\_ 20150718  
Time 12.47  
INSTRUM spect  
PROBHD 5 mm PABBO BB/  
PULPROG zgpg30  
TD 32768  
SOLVENT CDCl3  
NS 256  
DS 2  
SWH 24038.461 Hz  
FIDRES 0.733596 Hz  
AQ 0.6816244 sec  
RG 77.59  
DW 20.800 usec  
DE 6.50 usec  
TE 296.8 K  
D1 2.0000000 sec  
D11 0.03000000 sec  
TD0 1

===== CHANNEL f1 =====  
NUC1 13C  
P1 8.90 usec  
PLW1 54.0000000 W  
SFO1 100.6278588 MHz

===== CHANNEL f2 =====  
CPDPRG2 waltz16  
NUC2 1H  
PCPD2 80.00 usec  
PLW2 12.0000000 W  
PLW12 0.40792999 W  
PLW13 0.26107001 W  
SFO2 400.1516006 MHz

F2 - Processing parameters  
SI 16384  
SF 100.6177880 MHz  
WDW EM  
SSB 0  
LB 1.00 Hz  
GB 0  
PC 1.40

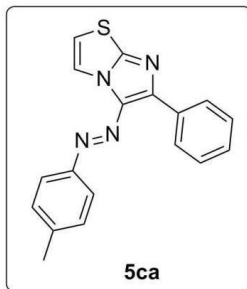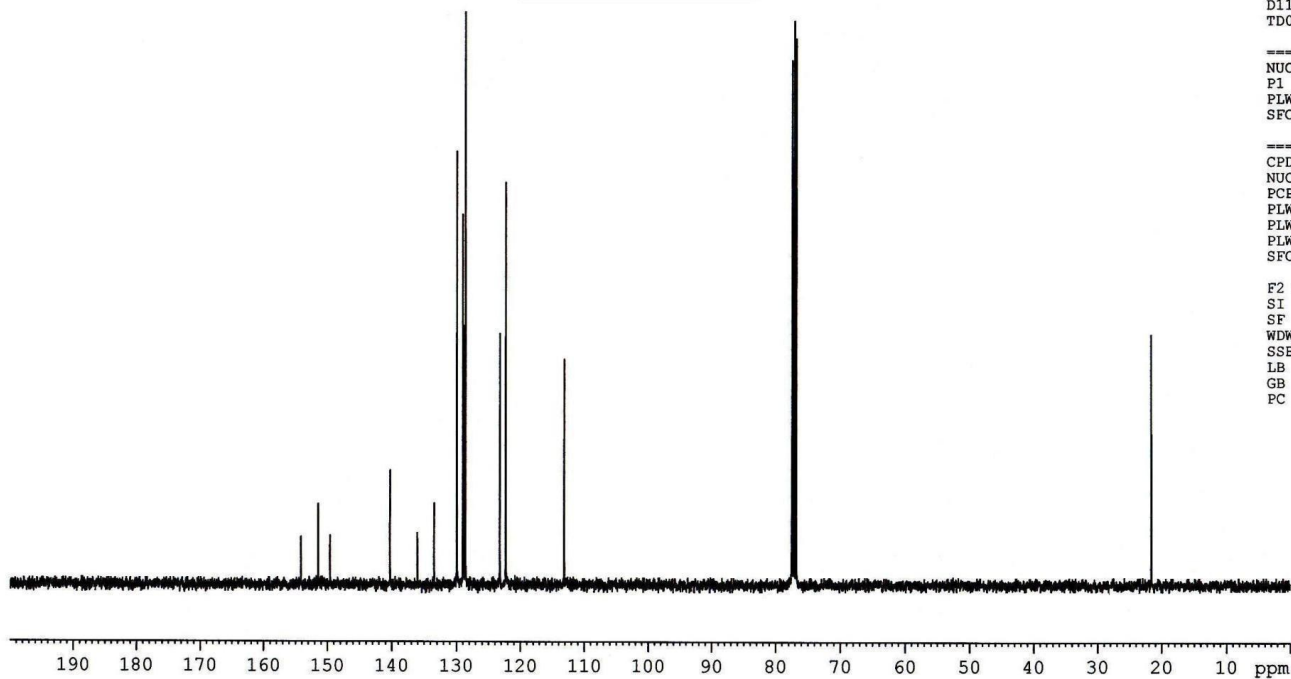

1H of VBAC-144

9.318  
 8.284  
 8.262  
 8.090  
 8.069  
 7.796  
 7.777  
 7.363  
 7.344  
 7.325  
 7.260  
 7.008  
 6.991  
 6.975

4.407  
 4.389  
 4.372  
 4.354  
 3.893

1.422  
 1.405  
 1.387

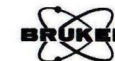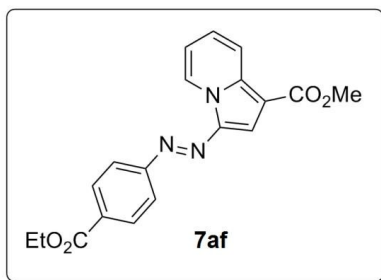

Current Data Parameters  
 NAME Dr. A HAJRA 2015  
 EXPNO 582  
 PROCNO 1

F2 - Acquisition Parameters  
 Date\_ 20150903  
 Time 12.35  
 INSTRUM spect  
 PROBHD 5 mm PABBO BB/  
 PULPROG zg30  
 TD 32768  
 SOLVENT CDC13  
 NS 24  
 DS 1  
 SWH 8223.685 Hz  
 FIDRES 0.250967 Hz  
 AQ 1.9923444 sec  
 RG 40.87  
 DW 60.800 usec  
 DE 6.50 usec  
 TE 297.2 K  
 D1 1.0000000 sec  
 TD0 1

===== CHANNEL f1 =====  
 NUC1 1H  
 P1 14.75 usec  
 PLW1 11.99499989 W  
 SFO1 400.1524711 MHz

F2 - Processing parameters  
 SI 16384  
 SF 400.1500090 MHz  
 WDW EM  
 SSB 0  
 LB 0.30 Hz  
 GB 0  
 PC 1.00

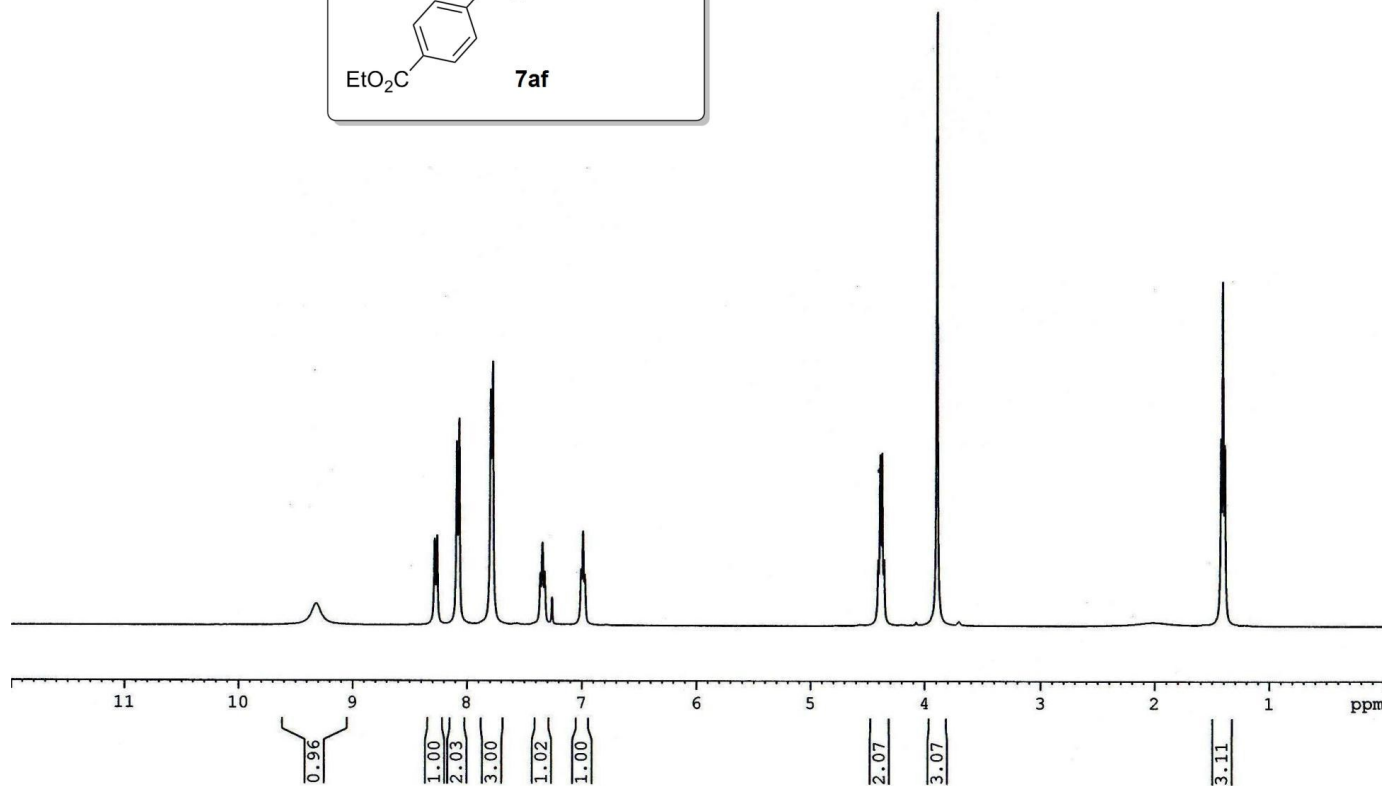

13C of VBAC-144

166.26  
 164.65  
 156.12  
 138.21  
 130.59  
 130.45  
 127.57  
 121.65  
 119.88  
 115.48  
 108.25  
 77.48  
 77.16  
 76.85  
 61.16  
 51.45  
 14.44

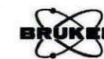

Current Data Parameters  
 NAME Dr. A HAJRA 2015  
 EXPNO 583  
 PROCNO 1

F2 - Acquisition Parameters  
 Date\_ 20150903  
 Time\_ 12.49  
 INSTRUM spect  
 PROBHD 5 mm PABBO BB/  
 PULPROG zgpg30  
 TD 32768  
 SOLVENT CDCl3  
 NS 256  
 DS 2  
 SWH 24038.461 Hz  
 FIDRES 0.733596 Hz  
 AQ 0.6816244 sec  
 RG 40.87  
 DW 20.800 usec  
 DE 6.50 usec  
 TE 298.3 K  
 D1 2.0000000 sec  
 D11 0.0300000 sec  
 TD0 1

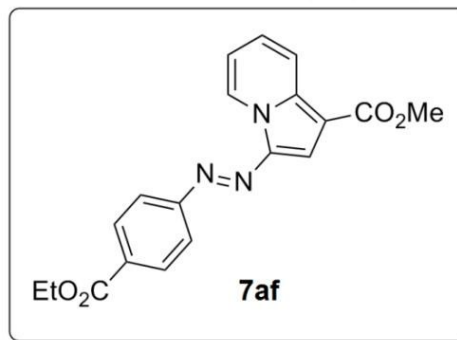

CHANNEL f1  
 NUC1 13C  
 P1 8.90 usec  
 PLW1 54.0000000 W  
 SFO1 100.6278588 MHz

CHANNEL f2  
 CPDPRG2 waltz16  
 NUC2 1H  
 PCPD2 80.00 usec  
 PLW2 12.0000000 W  
 PLW12 0.40792999 W  
 PLW13 0.26107001 W  
 SFO2 400.1516006 MHz

F2 - Processing parameters  
 SI 16384  
 SF 100.6177895 MHz  
 WDW EM  
 SSB 0  
 LB 1.00 Hz  
 GB 0  
 PC 1.40

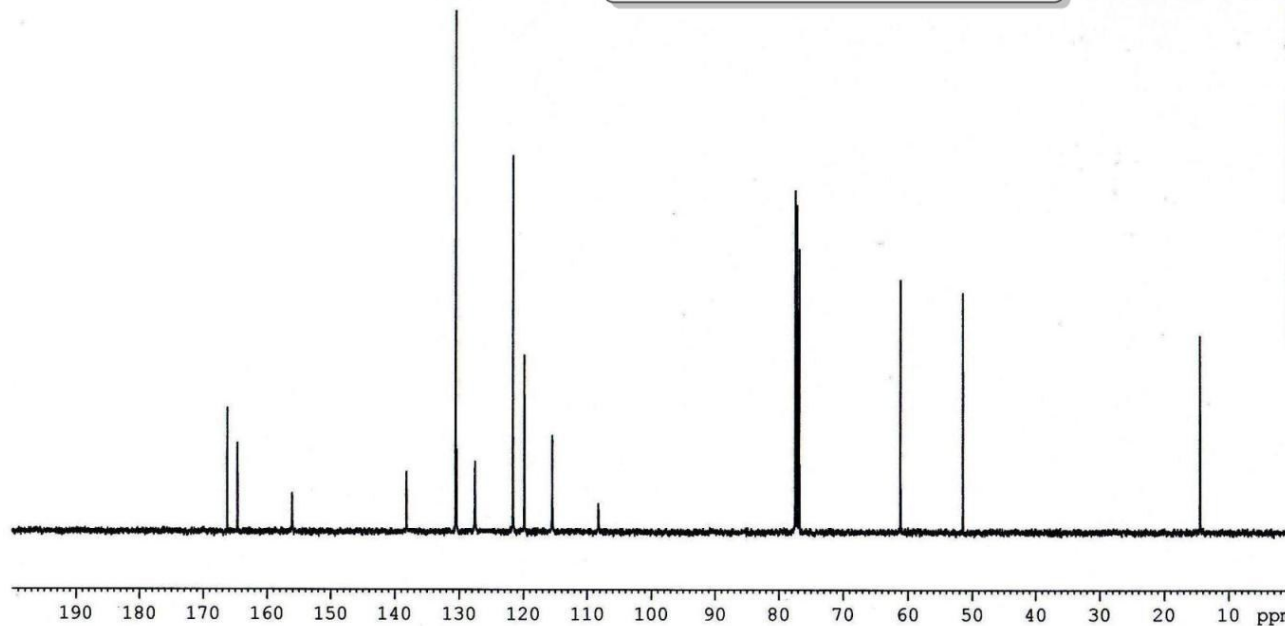

1H of VBAC-152

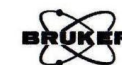

Current Data Parameters  
 NAME Dr. A HAJRA 2015  
 EXPNO 612  
 PROCNO 1

F2 - Acquisition Parameters  
 Date\_ 20150913  
 Time 16.22  
 INSTRUM spect  
 PROBHD 5 mm PABBO BB/  
 PULPROG zg30  
 TD 32768  
 SOLVENT CDCl3  
 NS 24  
 DS 1  
 SWH 8223.685 Hz  
 FIDRES 0.250967 Hz  
 AQ 1.9923444 sec  
 RG 93.46  
 DW 60.800 usec  
 DE 6.50 usec  
 TE 298.1 K  
 D1 1.0000000 sec  
 TD0 1

===== CHANNEL f1 =====  
 NUC1 1H  
 P1 14.75 usec  
 PLW1 11.99499989 W  
 SFO1 400.1524711 MHz

F2 - Processing parameters  
 SI 16384  
 SF 400.1500100 MHz  
 WDW EM  
 SSB 0  
 LB 0.30 Hz  
 GB 0  
 PC 1.00

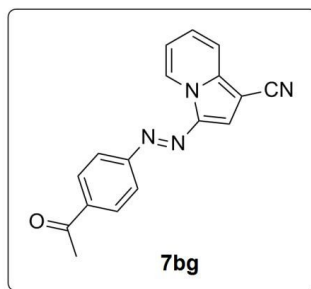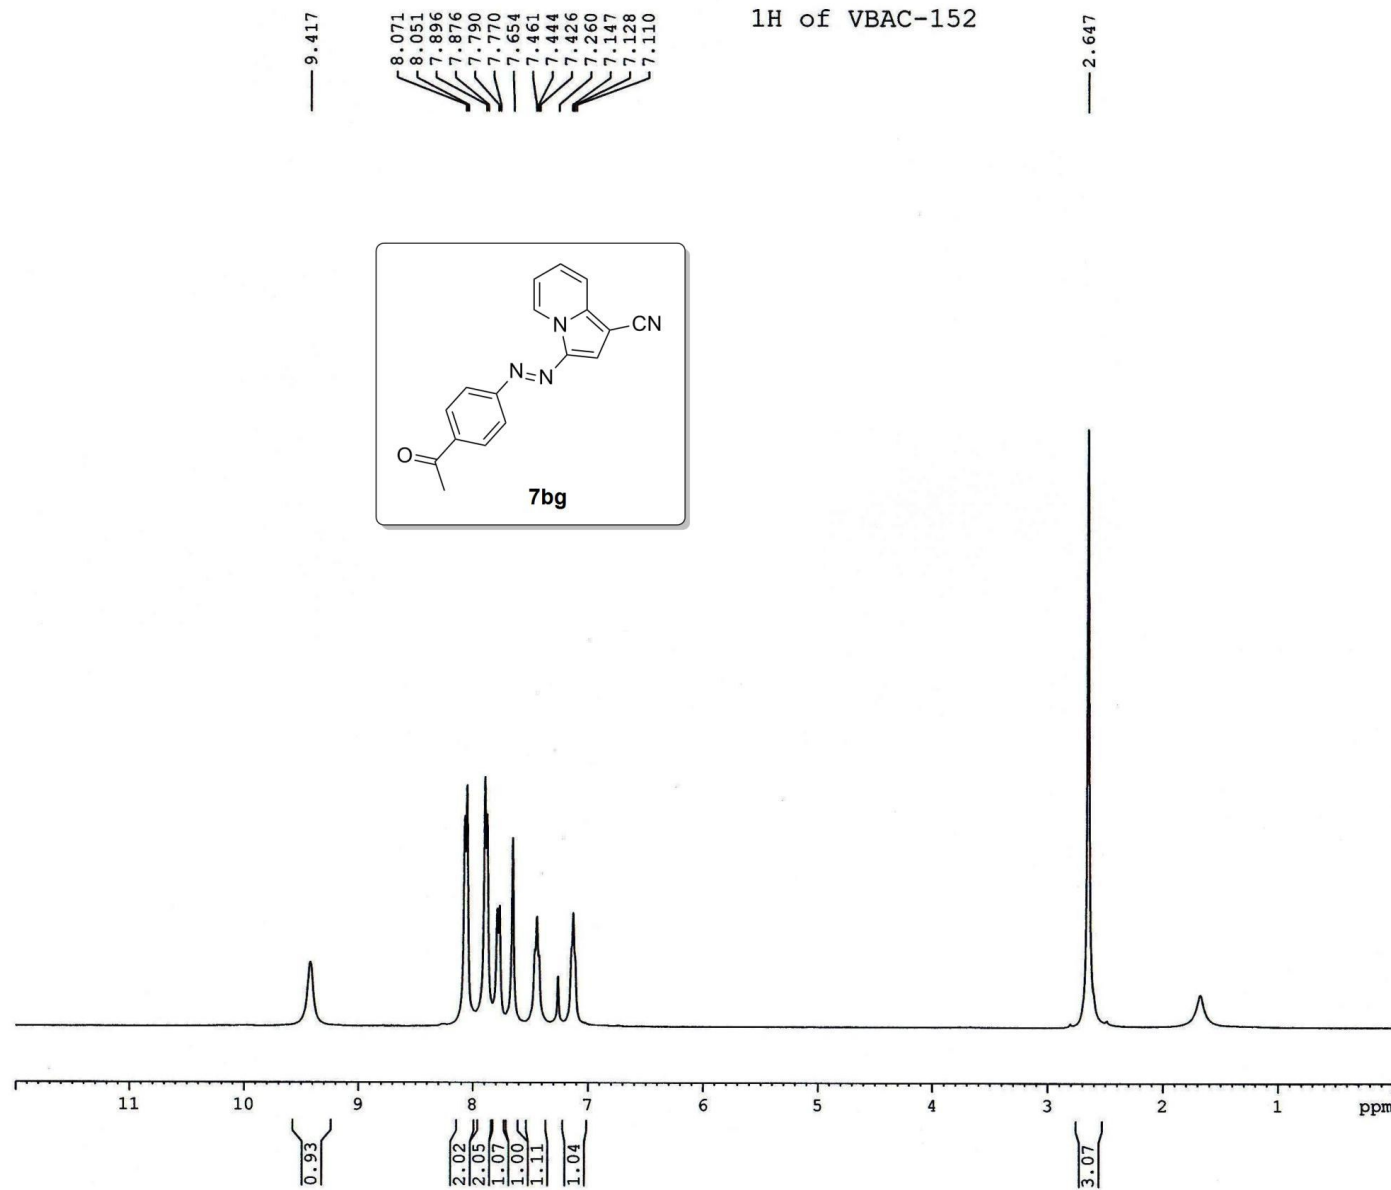

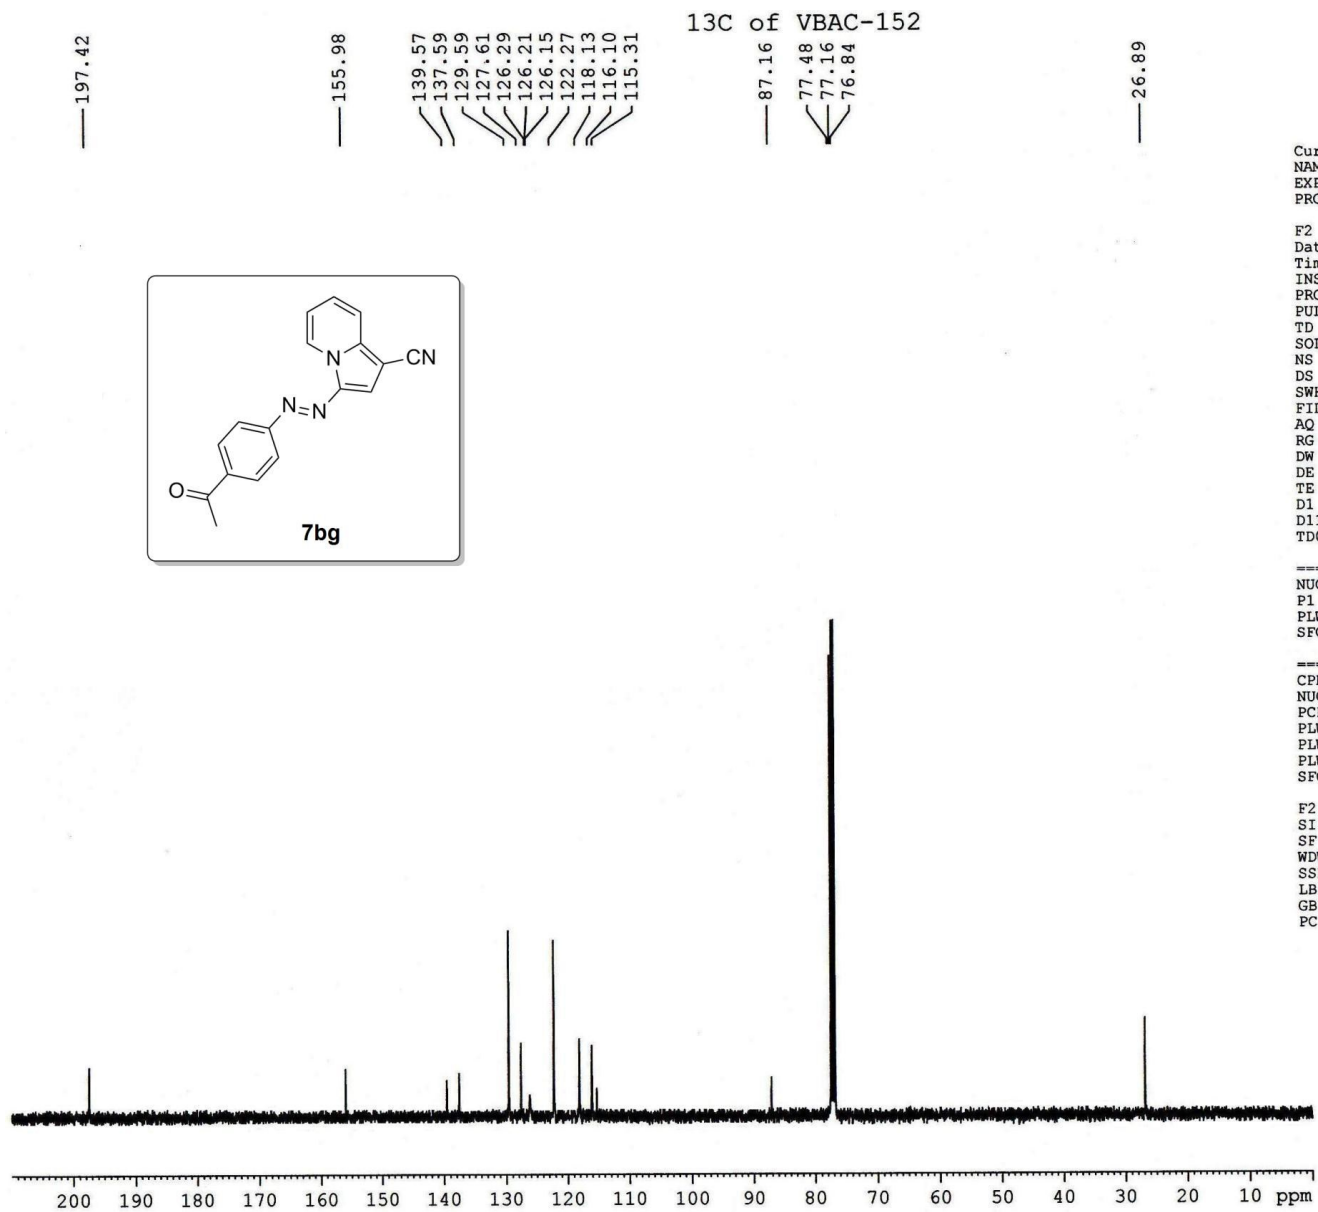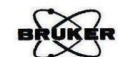

Current Data Parameters  
 NAME Dr. A HAJRA 2015  
 EXPNO 613  
 PROCNO 1

F2 - Acquisition Parameters  
 Date\_ 20150913  
 Time\_ 16.35  
 INSTRUM spect  
 PROBHD 5 mm PABBO BB/  
 PULPROG zgpg30  
 TD 32768  
 SOLVENT CDCl3  
 NS 256  
 DS 2  
 SWH 24038.461 Hz  
 FIDRES 0.733596 Hz  
 AQ 0.6816244 sec  
 RG 93.46  
 DW 20.800 usec  
 DE 6.50 usec  
 TE 299.1 K  
 D1 2.0000000 sec  
 D11 0.0300000 sec  
 TDO 1

===== CHANNEL f1 =====  
 NUC1 13C  
 P1 8.90 usec  
 PLW1 54.00000000 W  
 SFO1 100.6278588 MHz

===== CHANNEL f2 =====  
 CPDPRG2 waltz16  
 NUC2 1H  
 PCPD2 80.00 usec  
 PLW2 12.00000000 W  
 PLW12 0.40792999 W  
 PLW13 0.26107001 W  
 SFO2 400.1516006 MHz

F2 - Processing parameters  
 SI 16384  
 SF 100.6177865 MHz  
 WDW EM  
 SSB 0  
 LB 1.00 Hz  
 GB 0  
 PC 1.40

LH of VBAC-128

8.427  
8.406  
7.847  
7.837  
7.830  
7.737  
7.718  
7.700  
7.589  
7.569  
7.551  
7.424  
7.414  
7.260  
7.105  
7.098  
7.088

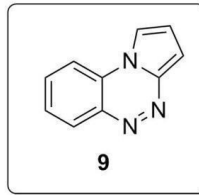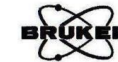

Current Data Parameters  
NAME Dr. A HAJRA 2015  
EXPNO 405  
PROCNO 1

F2 - Acquisition Parameters  
Date\_ 20150720  
Time\_ 16.50  
INSTRUM spect  
PROBHD 5 mm PABBO BB/  
PULPROG zg30  
TD 32768  
SOLVENT CDC13  
NS 32  
DS 1  
SWH 8223.685 Hz  
FIDRES 0.250967 Hz  
AQ 1.9923444 sec  
RG 106.66  
DW 60.800 usec  
DE 6.50 usec  
TE 297.9 K  
D1 1.00000000 sec  
TD0 1

===== CHANNEL f1 =====  
NUC1 1H  
P1 14.75 usec  
PLW1 11.99499989 W  
SF01 400.1524711 MHz

F2 - Processing parameters  
SI 16384  
SF 400.1500090 MHz  
WDW EM  
SSB 0  
LB 0.30 Hz  
GB 0  
PC 1.00

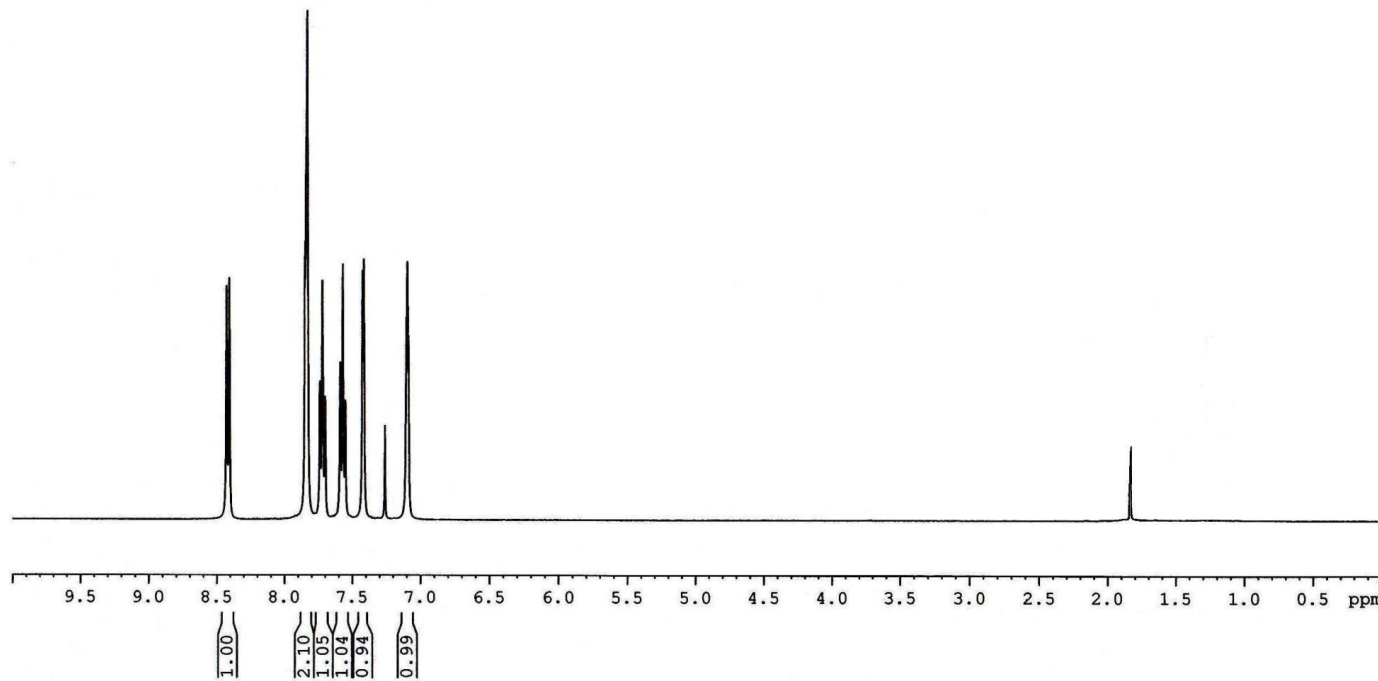

13C of VBAC-128

141.30  
136.49  
132.26  
130.76  
125.85  
124.90  
116.35  
113.45  
111.04  
108.95

77.48  
77.16  
76.85

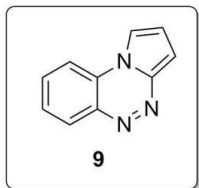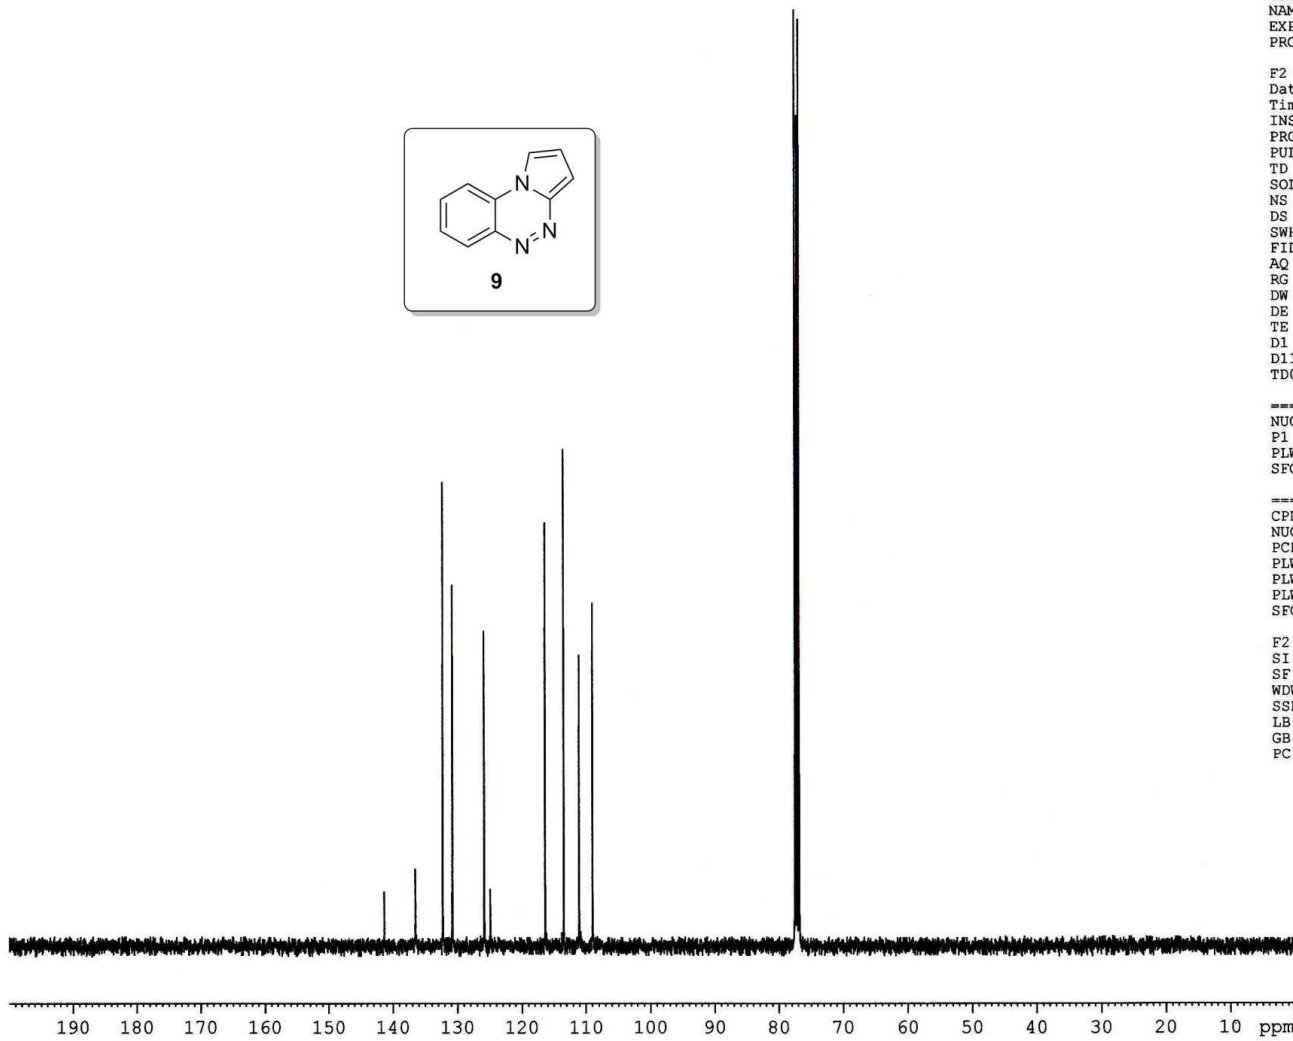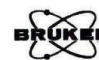

Current Data Parameters  
NAME Dr. A HAJRA 2015  
EXPNO 409  
PROCNO 1

F2 - Acquisition Parameters  
Date\_ 20150720  
Time\_ 19.23  
INSTRUM spect  
PROBHD 5 mm PABBO BB/  
PULPROG zgpg30  
TD 32768  
SOLVENT CDCl3  
NS 512  
DS 2  
SWH 24038.461 Hz  
FIDRES 0.733596 Hz  
AQ 0.6816244 sec  
RG 106.66  
DW 20.800 usec  
DE 6.50 usec  
TE 298.3 K  
D1 2.0000000 sec  
D11 0.0300000 sec  
TD0 1

===== CHANNEL f1 =====  
NUC1 13C  
P1 8.90 usec  
PLW1 54.0000000 W  
SFO1 100.6278588 MHz

===== CHANNEL f2 =====  
CPDPRG2 waltz16  
NUC2 1H  
PCPD2 80.00 usec  
PLW2 12.0000000 W  
PLW12 0.40792999 W  
PLW13 0.26107001 W  
SFO2 400.1516006 MHz

F2 - Processing parameters  
SI 16384  
SF 100.6177856 MHz  
WDW EM  
SSB 0  
LB 1.00 Hz  
GB 0  
PC 1.40
